# Supplementary material for: Construction of ratiometric optical thermometers by linking chiral cyclometalated dicyanidoiridates( iii ) with europium( iii ) luminophores into cluster compounds
Source: Royal Society of Chemistry journal article supplement (doi:10.1039/d5tc02747k), 2026-01-01
Supplement: d5tc02747k1.pdf [file d5tc02747k1.pdf]

## Supporting information

### Construction of ratiometric optical thermometers by linking chiral cyclometalated dicyanidoiridates(III) with europium(III) luminophores into cluster compounds

Jan Rzepiela,<sup>a,b</sup> Mikolaj Zychowicz,<sup>a,b</sup> Jakub J. Zakrzewski,<sup>a</sup> Shin-ichi Ohkoshi,<sup>c</sup> Sebastian Baś,<sup>a</sup>  
and Szymon Chorazy\*<sup>a</sup>

<sup>a</sup>Faculty of Chemistry, Jagiellonian University, Gronostajowa 2, 30-387 Kraków, Poland. <sup>b</sup>Jagiellonian University, Doctoral School of Exact and Natural Sciences, Łojasiewicza 11, 30-348 Kraków, Poland. <sup>c</sup>Department of Chemistry, School of Science, The University of Tokyo, 7-3-1 Hongo, Bunkyo-ku, Tokyo 113-0033, Japan

\*Corresponding author: simon.chorazy@uj.edu.pl

|                                                                                                                                                                                                                                                                                                                      |         |
|----------------------------------------------------------------------------------------------------------------------------------------------------------------------------------------------------------------------------------------------------------------------------------------------------------------------|---------|
| Experimental details.                                                                                                                                                                                                                                                                                                | S3–S5   |
| Infrared (IR) spectra of reported compounds (Fig. S1) with the comment.                                                                                                                                                                                                                                              | S8      |
| Thermogravimetric (TG) curves of reported compounds (Fig. S2) with the comment.                                                                                                                                                                                                                                      | S9      |
| Details of the crystal data and structure refinement for <b>R,R-Fpinppy</b> , <b>R,R-Flr</b> , and <b>Eu<sub>2</sub>Ir<sub>2</sub></b> , compared with the analogous data for previously reported TBA[Ir <sup>III</sup> (CN) <sub>2</sub> ( <i>R,R</i> -pinppy) <sub>2</sub> ] · 2MeCN ( <b>R,R-Ir</b> ). (Table S1) | S10     |
| Representative views of the crystal structures of <b>R,R-Fpinppy</b> and <b>R,R-Flr</b> . (Fig. S3 and S4)                                                                                                                                                                                                           | S11–S12 |
| Selected detailed structure parameters of <b>R,R-Flr</b> . (Table S2)                                                                                                                                                                                                                                                | S13     |
| Representative views of the crystal structure of <b>Eu<sub>2</sub>Ir<sub>2</sub></b> . (Fig. S5)                                                                                                                                                                                                                     | S14     |
| Selected detailed structure parameters of <b>Eu<sub>2</sub>Ir<sub>2</sub></b> . (Table S3)                                                                                                                                                                                                                           | S15     |
| Results of Continuous Shape Measure analysis for Ir(III) complexes in <b>R,R-Flr</b> and <b>Eu<sub>2</sub>Ir<sub>2</sub></b> . (Table S4)                                                                                                                                                                            | S16     |
| The experimental and calculated P-XRD patterns for obtained materials (Fig. S6) with the comment.                                                                                                                                                                                                                    | S17     |
| Detailed SHG characteristics for <b>R,R-Flr</b> and <b>Eu<sub>2</sub>Flr<sub>2</sub></b> , including the wavelength dependences for the SHG output light and the respective power dependences for the SHG light at 520 nm. (Fig. S7)                                                                                 | S18     |
| Comparison of the SHG intensities for the reported compounds and the reference materials. (Table S5)                                                                                                                                                                                                                 | S19     |
| Solid-state UV-vis absorption spectra of reported compounds. (Fig. S8)                                                                                                                                                                                                                                               | S20     |
| Solid-state room- and low-temperature (77 K) photoluminescent characteristics of <b>R,R-Flr</b> . (Fig. S9)                                                                                                                                                                                                          | S21     |
| Comparison of solid-state photoluminescence properties of used organic ligands of <b>R,R-Fpinppy</b> and <b>R,R-pinppy</b> , as well as the analogous properties of <b>R,R-Flr</b> and <b>R,R-Ir</b> . (Fig. S10)                                                                                                    | S22     |
| The emission color of <b>R,R-Fpinppy</b> and <b>R,R-Flr</b> presented on the CIE 1931 chromaticity diagram, and the related CIE 1931 parameters. (Fig. S11, Table S6)                                                                                                                                                | S23     |
| The set of emission lifetimes gathered for <b>R,R-Flr</b> at room temperature under three different emission maxima and analogously at low temperature, and the resulting best-fit parameters. (Fig. S12, Table S7)                                                                                                  | S24     |
| The set of temperature-variable photoluminescent characteristics of <b>Eu<sub>2</sub>Flr<sub>2</sub></b> . (Fig. S13)                                                                                                                                                                                                | S25     |
| The emission colors of <b>Eu<sub>2</sub>Flr<sub>2</sub></b> , presented on the CIE 1931 chromaticity diagram, representing the <i>T</i> -dependences of the emission, and the summary of CIE 1931 parameters. (Fig. S14, Table S8)                                                                                   | S26     |
| Emission decay profiles for <b>Eu<sub>2</sub>Flr<sub>2</sub></b> under the 361 nm excitation and the 617 nm emission, as well as the 374 nm excitation and the 460 nm emission, at variable indicated temperatures. (Fig. S15 and S16)                                                                               | S27–S28 |
| The best-fit parameters for emission decay profiles of <b>Eu<sub>2</sub>Flr<sub>2</sub></b> at variable <i>T</i> . (Tables S9 and S10)                                                                                                                                                                               | S29     |
| The set of temperature-variable photoluminescent characteristics of <b>Eu<sub>2</sub>Ir<sub>2</sub></b> . (Fig. S17)                                                                                                                                                                                                 | S30     |
| The emission colors of <b>Eu<sub>2</sub>Ir<sub>2</sub></b> , presented on the CIE 1931 chromaticity diagram, representing the <i>T</i> -dependences of the emission, and the summary of CIE 1931 parameters. (Fig. S18, Table S11)                                                                                   | S31–S32 |
| Emission decay profiles for <b>Eu<sub>2</sub>Ir<sub>2</sub></b> under the 356 nm excitation and the 617 nm emission, as well as the 374 nm excitation and the 470 nm emission, at variable indicated temperatures. (Fig. S19 and S20)                                                                                | S33–S34 |
| The best-fit parameters for emission decay profiles of <b>Eu<sub>2</sub>Ir<sub>2</sub></b> at variable <i>T</i> . (Tables S12 and S13)                                                                                                                                                                               | S35     |
| Comment on ratiometric optical thermometry studies.                                                                                                                                                                                                                                                                  | S36     |
| The full set of the characteristics of ratiometric optical thermometry based on excitation spectra of <b>Eu<sub>2</sub>Flr<sub>2</sub></b> and <b>Eu<sub>2</sub>Ir<sub>2</sub></b> , and the related best-fit parameters to the Mott-Seitz model. (Fig. S21, Table S14)                                              | S37–S38 |
| The set of the characteristics of ratiometric thermometry based on emission spectra of <b>Eu<sub>2</sub>Flr<sub>2</sub></b> under the 361 nm excitation, and the related best-fit parameters to the Mott-Seitz model. (Fig. S22, Table S15)                                                                          | S39–S40 |
| The set of the characteristics of ratiometric thermometry based on emission spectra of <b>Eu<sub>2</sub>Flr<sub>2</sub></b> under the 380 nm excitation, and the related best-fit parameters to the Mott-Seitz model. (Fig. S23, Table S16)                                                                          | S41–S42 |

|                                                                                                                                                                                                                                                                                                                                                                                                                                                         |         |
|---------------------------------------------------------------------------------------------------------------------------------------------------------------------------------------------------------------------------------------------------------------------------------------------------------------------------------------------------------------------------------------------------------------------------------------------------------|---------|
| The set of the characteristics of ratiometric thermometry based on emission spectra of <b>Eu<sub>2</sub>Flr<sub>2</sub></b> using the ratios between the integrated areas of the peaks instead of the ratios between the intensities for the maxima, and the related best-fit parameters to the Mott-Seitz model. (Fig. S24, Table S17)                                                                                                                 | S43–S44 |
| The set of the characteristics of ratiometric thermometry based on emission spectra of <b>Eu<sub>2</sub>Ir<sub>2</sub></b> under the 340 nm excitation, and the related best-fit parameters to the Mott-Seitz model. (Fig. S25, Table S18)                                                                                                                                                                                                              | S45–S46 |
| The set of the characteristics of ratiometric thermometry based on emission spectra of <b>Eu<sub>2</sub>Ir<sub>2</sub></b> under the 356 nm excitation, and the related best-fit parameters to the Mott-Seitz model. (Fig. S26, Table S19)                                                                                                                                                                                                              | S47–S48 |
| The set of the characteristics of ratiometric thermometry based on emission spectra of <b>Eu<sub>2</sub>Ir<sub>2</sub></b> under the 380 nm excitation, and the related best-fit parameters to the Mott-Seitz model. (Fig. S27, Table S20)                                                                                                                                                                                                              | S49–S50 |
| The set of the characteristics of ratiometric thermometry based on emission spectra of <b>Eu<sub>2</sub>Ir<sub>2</sub></b> under the 407 nm excitation, and the related best-fit parameters to the Mott-Seitz model. (Fig. S28, Table S21)                                                                                                                                                                                                              | S51–S52 |
| The set of the characteristics of ratiometric thermometry based on emission spectra of <b>Eu<sub>2</sub>Ir<sub>2</sub></b> using the ratios between the integrated areas of the peaks instead of the ratios between the intensities for the maxima, and the related best-fit parameters to the Mott-Seitz model. (Fig. S29, Table S22)                                                                                                                  | S53–S54 |
| The characteristics of thermometry based on emission lifetimes of Ir(III) and Eu(III), and their ratio, in <b>Eu<sub>2</sub>Flr<sub>2</sub></b> and <b>Eu<sub>2</sub>Ir<sub>2</sub></b> , and the related best-fit parameters to the Mott-Seitz model. (Fig. S30, Table S23)                                                                                                                                                                            | S55–S56 |
| Computational details.                                                                                                                                                                                                                                                                                                                                                                                                                                  | S57     |
| Comparison of the geometry of the [Ir <sup>III</sup> (CN) <sub>2</sub> ( <i>R,R</i> -Fpinppy) <sub>2</sub> ] <sup>−</sup> complex from the SC-XRD data for <b><i>R,R</i>-Flr</b> with its optimized geometry for the ground state and the first excited spin-orbit state. (Fig. S31, Table S24)                                                                                                                                                         | S58–S59 |
| Selected molecular orbitals for the optimized ground state of [Ir <sup>III</sup> (CN) <sub>2</sub> ( <i>R,R</i> -Fpinppy) <sub>2</sub> ] <sup>−</sup> ions. (Fig. S32)                                                                                                                                                                                                                                                                                  | S60     |
| The computed energies of the five lowest-lying excited singlet and triplet states of [Ir <sup>III</sup> (CN) <sub>2</sub> ( <i>R,R</i> -Fpinppy) <sub>2</sub> ] <sup>−</sup> complexes in their optimized geometry of the ground electronic state, shown together with the weights of molecular orbitals that contribute to each excitation. (Table S25)                                                                                                | S62     |
| The computed energies of singlet states and SO-states for the ground geometry of [Ir <sup>III</sup> (CN) <sub>2</sub> ( <i>R,R</i> -Fpinppy) <sub>2</sub> ] <sup>−</sup> complexes, and the composition of SO-states for the 30 lowest-lying states. (Table S26)                                                                                                                                                                                        | S62     |
| The difference electron density maps of the nine lowest SO-states for the ground state geometry of [Ir <sup>III</sup> (CN) <sub>2</sub> ( <i>R,R</i> -Fpinppy) <sub>2</sub> ] <sup>−</sup> complexes. (Fig. S33)                                                                                                                                                                                                                                        | S63     |
| Comparison of the experimental solid-state UV-vis absorption spectra of <b><i>R,R</i>-Flr</b> , containing [Ir <sup>III</sup> (CN) <sub>2</sub> ( <i>R,R</i> -Fpinppy) <sub>2</sub> ] <sup>−</sup> ions, with the calculated spectra for these complexes. (Fig. S34)                                                                                                                                                                                    | S64     |
| Selected molecular orbitals for the optimized excited state of [Ir <sup>III</sup> (CN) <sub>2</sub> ( <i>R,R</i> -Fpinppy) <sub>2</sub> ] <sup>−</sup> ions. (Fig. S35)                                                                                                                                                                                                                                                                                 | S65     |
| The computed energies of the five lowest-lying excited singlet and triplet states of [Ir <sup>III</sup> (CN) <sub>2</sub> ( <i>R,R</i> -Fpinppy) <sub>2</sub> ] <sup>−</sup> complexes in their optimized geometry of the excited electronic state, shown together with the weights of molecular orbitals that contribute to each excitation. (Table S27)                                                                                               | S66     |
| The computed energies of singlet states and SO-states for the excited-state geometry of [Ir <sup>III</sup> (CN) <sub>2</sub> ( <i>R,R</i> -Fpinppy) <sub>2</sub> ] <sup>−</sup> complexes, and the composition of SO-states for the 30 lowest-lying states. (Table S28)                                                                                                                                                                                 | S67     |
| The difference electron density maps of the nine lowest SO-states for the excited-state geometry of [Ir <sup>III</sup> (CN) <sub>2</sub> ( <i>R,R</i> -Fpinppy) <sub>2</sub> ] <sup>−</sup> complexes. (Fig. S36)                                                                                                                                                                                                                                       | S68     |
| Comparison of experimental emission spectra gathered for <b><i>R,R</i>-Flr</b> and the previously published <b><i>R,R</i>-Ir</b> with the energies of the electronic transitions calculated TD-DFT and SOC-containing TD-DFT approaches for the optimized excited-state geometry of related Ir(III) complexes. (Fig. S37)                                                                                                                               | S69     |
| Summary of the representative parameters of luminescent thermometry in <b>Eu<sub>2</sub>Ir<sub>2</sub></b> and <b>Eu<sub>2</sub>Flr<sub>2</sub></b> . (Table S29)                                                                                                                                                                                                                                                                                       | S70     |
| Comparison of the experimental P-XRD patterns gathered for the samples of <b>Eu<sub>2</sub>Ir<sub>2</sub></b> and <b>Eu<sub>2</sub>Flr<sub>2</sub></b> after performing on them the full set of <i>T</i> -variable photoluminescent measurements with the P-XRD pattern calculated for the structural model of <b>Eu<sub>2</sub>Ir<sub>2</sub></b> obtained within the SC-XRD experiment. (Fig. S38)                                                    | S71     |
| Comparison of the molecular building units of the reported compound of <b>Eu<sub>2</sub>Ir<sub>2</sub></b> with those for the previously reported <b>La<sub>2</sub>Ir<sub>2</sub></b> analog, and the previously reported closely related <b>Eu<sub>2</sub>Ir<sub>2</sub></b> compound with ppy ligands used instead of <i>R,R</i> -pinppy as well as PPN <sup>+</sup> cations used instead of the TBA <sup>+</sup> ones. (Fig. S39)                    | S72     |
| Detailed calculations of the charges of cationic and anionic components of the molecular building units of <b>Eu<sub>2</sub>Ir<sub>2</sub></b> , the previously reported <b>La<sub>2</sub>Ir<sub>2</sub></b> structural analog, and the previously reported closely related <b>Eu<sub>2</sub>Ir<sub>2</sub></b> compound with ppy ligands used instead of <i>R,R</i> -pinppy as well as PPN <sup>+</sup> used instead of TBA <sup>+</sup> . (Table S30) | S73     |
| ESI-TOF mass spectra (MS) for the acetonitrile solutions of <b>Eu<sub>2</sub>Ir<sub>2</sub></b> and <b>Eu<sub>2</sub>Flr<sub>2</sub></b> . (Fig. S40 and S41, Table S31)                                                                                                                                                                                                                                                                                | S74–S76 |
| Comment on the negative charge of pinppy ligands within Ir(III) complexes in reported compounds.                                                                                                                                                                                                                                                                                                                                                        | S77     |
| The representative set of published cyclometalated Ir(III) complexes bearing the carbanion form of 2-phenylpyridine and its derivatives. (Fig. S42)                                                                                                                                                                                                                                                                                                     | S78     |
| References to the Supporting Information.                                                                                                                                                                                                                                                                                                                                                                                                               | S79–S80 |

## Experimental details

### Materials

Iridium(III) chloride hydrate, 4-fluoroacetophenone, (*R,S*)-myrtenal, and bromine were purchased from Sigma-Aldrich and used without any purification. All other common reagents and solvents were purchased from Sigma-Aldrich or TCI Chemicals and used as received unless otherwise noted. The reagents used for the preparation of previously reported compounds (*R,R*-pinppyH and *R,R*-Ir) are described in Ref. S1.

### Synthesis of 2-phenyl-4,5-pinenopyridine (*R,R*-pinppyH) and TBA[ $\text{Ir}^{\text{III}}(\text{CN})_2(\text{R,R-pinppy})_2$ ] · 2MeCN (*R,R*-Ir)

The TBA[ $\text{Ir}^{\text{III}}(\text{CN})_2(\text{R,R-pinppy})_2$ ] · 2MeCN (*R,R*-Ir, TBA = tetrabutylammonium, *R,R*-pinppy = carbanion of (*R,R*)-2-phenyl-4,5-pinenopyridine) hybrid salt, further used for the synthesis of one of the reported heterometallic molecular assemblies (i.e., **Eu<sub>2</sub>Ir<sub>2</sub>**, see below), was prepared starting from the (*R,R*)-2-phenyl-4,5-pinenopyridine (*R,R*-pinppyH) organic precursor. Both the *R,R*-Ir salt as well as the *R,R*-pinppyH precursor were obtained following the recently published procedures.<sup>S1</sup>

### Synthesis of 2-(4-fluorophenyl)-4,5-pinenopyridine (*R,R*-FpinppyH)

The solution of 4-fluoroacetophenone (**P1**, see scheme below; 15.0 g, 109 mmol, i.e., 13.18 mL, 1.0 eq.) in 50 mL of acetic acid was prepared and cooled to 0 °C. Then, at this decreased temperature, bromine (19.7 g, 120 mmol, i.e., 6.15 mL, 1.1 eq.) was added dropwise. While still keeping 0 °C, the reaction was mixed for 20 minutes and then allowed to warm up to room temperature. After the resulting disappearance of the red color, the reaction mixture was diluted with dichloromethane (dcm) and extracted carefully with the 3 M NaOH solution. The organic layers were dried over  $\text{MgSO}_4$ , filtered, and evaporated to dryness. The obtained residue was dissolved in 50 mL of dcm and pyridine (12.9 g, 164 mmol, i.e., 13.2 mL, 1.5 eq.) was added. Then, the reaction mixture was mixed overnight. The precipitated product (**P2**, see scheme below) was filtered off, washed with diethyl ether, and dried. It was used in the next step without further purification or characterization. Yield: 28.7 g (89%).

To the Ace pressure vessel, the solution of **P2** (10.85 g, 36.6 mmol, 1.1 eq) and  $\text{NH}_4\text{OAc}$  (5.13 g, 66.6 mmol, 2.0 eq) in 100 mL of anhydrous ethanol was added. To this mixture, the (*R,S*)-myrtenal precursor (5.0 g, 33.3 mmol, i.e., 5.05 mL, 1.0 eq) was added. Then, the pressure vessel was closed and heated to 110 °C overnight. After cooling, the reaction mixture was diluted with dcm (300 mL). The precipitated solid was filtered on a silica pad, and the resulting solution was washed three times with water. The organic layers were dried over anhydrous sodium sulfate, evaporated, and purified by column chromatography of silica gel (Hex:AcOEt, 95:5) to give the final pure product of 2-(4-fluorophenyl)-4,5-pinenopyridine (*R,R*-FpinppyH, see scheme below). Yield: 8.90 g (72 %). Single crystals for XRD studies were obtained by cooling the saturated solution of the powder sample of *R,R*-FpinppyH in pentane to 0 °C overnight.

**Rf**: 0.29 (Hex:AcOEt, 95:5)

**<sup>1</sup>H NMR** (400 MHz,  $\text{CDCl}_3$ ,  $\text{Me}_4\text{Si}$ )  $\delta$  8.19 (s, 1H), 7.97 – 7.90 (m, 2H), 7.45 (s, 1H), 7.16 – 7.07 (m, 2H), 3.00 (d,  $J$  = 2.6 Hz, 2H), 2.84 (t,  $J$  = 5.5 Hz, 1H), 2.70 (dt,  $J$  = 9.6, 5.8 Hz, 1H), 2.30 (tt,  $J$  = 5.8, 2.8 Hz, 1H), 1.41 (s, 3H), 1.22 (d,  $J$  = 9.6 Hz, 1H), 0.65 (s, 3H).

**<sup>13</sup>C{<sup>1</sup>H} NMR** (101 MHz,  $\text{CDCl}_3$ ,  $\text{Me}_4\text{Si}$ )  $\delta$  163.3 (d,  $J$  = 247.4 Hz), 154.7, 146.0, 145.4, 141.2, 136.1, 128.5 (d,  $J$  = 8.2 Hz), 119.8, 115.6 (d,  $J$  = 21.5 Hz), 44.4, 40.2, 39.4, 33.0, 32.0, 26.1, 21.5. <sup>13</sup>C NMR spectrum was not decoupled from fluorine. The scheme below visualizes the whole synthetic pathway leading to enantiopure *R,R*-FpinppyH.

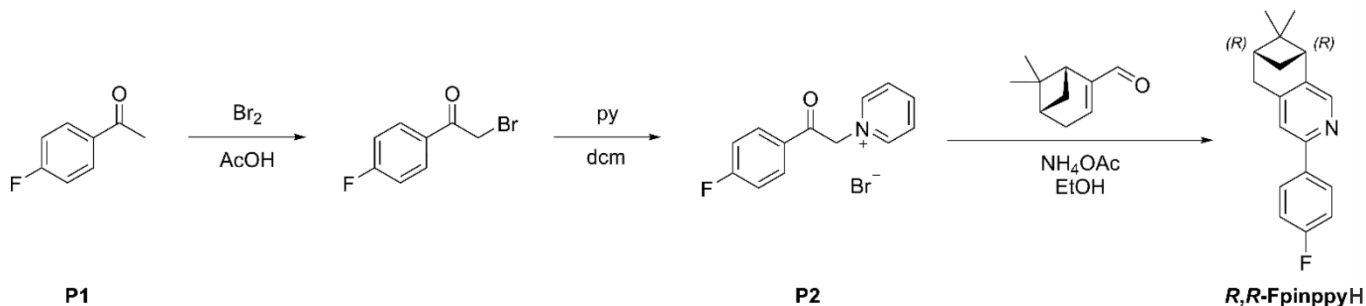

### Synthesis of TBA[ $\text{Ir}^{\text{III}}(\text{CN})_2(\text{R,R-Fpinppy})_2$ ] · 2MeCN (*R,R*-FIr)

The three-step synthesis of *R,R*-FIr started by mixing iridium(III) chloride hydrate (200 mg, 0.67 mmol, 1.0 eq) and *R,R*-FpinppyH (450 mg, 1.68 mmol, 2.5eq) in a mixture of 15 mL of ethoxyethanol and 5 mL of water. After 24 h of refluxing this mixture, the product of  $[\text{Ir}^{\text{III}}_2(\mu_2\text{-Cl})_2(\text{R,R-Fpinppy})_4]^{\text{S1}}$  was precipitated with water, filtered on a sintered glass funnel, washed subsequently with water and pentane, then dried. Yield: 436 mg, about 90%.

In the second step, the as-prepared powder sample of  $[\text{Ir}^{\text{III}}_2(\mu_2\text{-Cl})_2(\text{R,R-Fpinppy})_4]$  (436 mg, 0.30 mmol, 1 eq) was dissolved in the mixture of methanol (100 mL) and dcm (50 mL). Then, KCN (80 mg, 1.23 mmol, 4.1 eq) was added, and the reaction mixture was refluxed for 24 h. After being cooled, the reaction mixture was filtered, and the resulting

filtrate was evaporated to dryness. The resulting potassium salt of the objective Ir(III) complex, i.e.,  $K[Ir^{III}(CN)_2(R,R\text{-Fpinppy})_2]$  was dried and used directly in the last step.

The entire product was dissolved in 100 mL of methanol, and 215 mg of tetrabutylammonium (TBA) perchlorate (0.63 mmol, ca. two times the excess) was added. The resulting mixture was refluxed for 24 h, and the resulting precipitate was filtered. The filtrate was evaporated to dryness, dissolved in a small amount of chloroform, filtered, and the product was precipitated with diethyl ether. The last two steps resulted in 560 mg (yield of ca. 95 %) of yellow powder of the objective Ir(III) complex in the form of an organic salt. A single crystal of ***R,R*-Flr** was obtained by slow diffusion of diethyl ether into the acetonitrile (MeCN) solution of the respective originally obtained powder sample. Its composition of  $TBA[Ir^{III}(CN)_2(R,R\text{-Fpinppy})_2] \cdot 2MeCN$  (***R,R*-Flr<sup>solution</sup>**,  $M_W = 1060.46 \text{ g} \cdot \text{mol}^{-1}$ ) was determined by the single-crystal X-ray diffraction (SC-XRD) analysis. The crystals of ***R,R*-Flr<sup>solution</sup>** are hygroscopic and in the air atmosphere slowly lose the acetonitrile molecule and replace it with two water molecules, creating the hydrate form with the formula of  $TBA[Ir^{III}(CN)_2(R,R\text{-Fpinppy})_2] \cdot 2H_2O$  (***R,R*-Flr**,  $M_W = 1055.54 \text{ g} \cdot \text{mol}^{-1}$ ). This compositional change was confirmed by TGA and IR spectroscopy. Moreover, during this solvent exchange, the crystallinity of the product is not lost, and the phase purity and its air stability were proven by the powder X-ray diffraction (P-XRD) method. Elemental analysis calculated for the hydrated form, ***R,R*-Flr** ( $C_{54}H_{76}F_2Ir_1N_5O_2$ ): C, 61.45 %; H, 7.07 %; N, 6.64 %. Found: C, 61.91 %; H, 7.14 %; N, 6.57 %. TG (Fig. S2) shows the loss of 2  $H_2O$  molecules per formula unit. Calcd.: 3.41%; found: 3.51 %.

### Synthesis of **Eu<sub>2</sub>Ir<sub>2</sub>** cluster compound

The equimolar solution of freshly filtrated crystals of ***R,R*-Ir** (31 mg, 0.0315 mmol, 1.0 eq.) and europium(III) nitrate hexahydrate (14.1 mg, 0.0315 mmol, 1.0 eq.) in 2 mL of acetonitrile was prepared and slowly diffused with diethyl ether. After a few days, well-shaped yellow crystals of **Eu<sub>2</sub>Ir<sub>2</sub>** appeared. Yield: 37 mg (44%). Their composition of  $(TBA)_2\{[Eu^{III}(NO_3)_3(H_2O)_{0.5}]_2[Ir^{III}(CN)_2(R,R\text{-pinppy})_2]_2\} \cdot 2H_2O$  (**Eu<sub>2</sub>Ir<sub>2</sub><sup>solution</sup>**,  $M_W = 2687.84 \text{ g} \cdot \text{mol}^{-1}$ ) was determined by the SC-XRD analysis, while the purity of the phase and its air stability were proven by the P-XRD method. Exposure of **Eu<sub>2</sub>Ir<sub>2</sub><sup>solution</sup>** in the air causes the stabilization of the tetrahydrate composition of  $(TBA)_2\{[Eu^{III}(NO_3)_3(H_2O)_{0.5}]_2[Ir^{III}(CN)_2(R,R\text{-pinppy})_2]_2\} \cdot 4H_2O$  (**Eu<sub>2</sub>Ir<sub>2</sub>**,  $M_W = 2714.85 \text{ g} \cdot \text{mol}^{-1}$ ), without any structural transformation, which was confirmed by P-XRD, CHN elemental analysis, and TGA results. Elemental analysis calculated for the hydrated form, **Eu<sub>2</sub>Ir<sub>2</sub>** ( $C_{108}H_{152}Ir_2Eu_2N_{16}O_{22}$ ): C, 47.78 %; H, 5.64 %; N, 8.26 %. Found: C, 48.23 %; H, 5.56 %; N, 8.19 %. TG (Fig. S2) shows the loss of 4  $H_2O$  molecules per formula unit. Calcd.: 2.66 %; found: 3.12 %.

### Synthesis of **Eu<sub>2</sub>Flr<sub>2</sub>** cluster compound

The equimolar solution of freshly filtrated crystals of ***R,R*-Flr** (30 mg, 0.0284 mmol, 1.0 eq.) and europium(III) nitrate hexahydrate (12.7 mg, 0.0284 mmol, 1.0 eq.) in 2 mL of acetonitrile was prepared and slowly diffused by diethyl ether. After a few days, well-shaped yellow crystals of **Eu<sub>2</sub>Flr<sub>2</sub>** appeared. Yield 30 mg (39%). Their composition of  $(TBA)_2\{[Eu^{III}(NO_3)_3(H_2O)_{0.5}]_2[Ir^{III}(CN)_2(R,R\text{-Fpinppy})_2]_2\} \cdot nH_2O$  (**Eu<sub>2</sub>Flr<sub>2</sub><sup>solution</sup>**,  $M_W = 2732.77(+nH_2O) \text{ g} \cdot \text{mol}^{-1}$ ) was proven by the comparison of P-XRD diffractograms with **Eu<sub>2</sub>Ir<sub>2</sub>** (as the related single crystals of the sufficient quality for the SC-XRD analysis were not obtained). The P-XRD data also confirm the phase purity and the air stability of the obtained material. Exposure of **Eu<sub>2</sub>Flr<sub>2</sub><sup>solution</sup>** in the air causes the stabilization of the hexahydrate composition of  $(TBA)_2\{[Eu^{III}(NO_3)_3(H_2O)_{0.5}]_2[Ir^{III}(CN)_2(R,R\text{-Fpinppy})_2]_2\} \cdot 6H_2O$  (**Eu<sub>2</sub>Flr<sub>2</sub>**,  $M_W = 2822.85 \text{ g} \cdot \text{mol}^{-1}$ ), without any structural transformation, which was confirmed by P-XRD, CHN elemental analysis, and TGA results. Elemental analysis calculated for the hydrated form, **Eu<sub>2</sub>Flr<sub>2</sub>·6H<sub>2</sub>O** ( $C_{108}H_{152}F_4Ir_2Eu_2N_{16}O_{24}$ ): C, 45.95 %; H, 5.43 %; N, 7.94 %. Found: C, 45.46 %; H, 5.36 %; N, 7.63 %. TG (Fig. S2) shows the loss of 6  $H_2O$  molecules per formula unit. Calcd.: 3.83 %; found: 3.44 %.

**Comment on the determination of the composition of **Eu<sub>2</sub>Ir<sub>2</sub>** and **Eu<sub>2</sub>Flr<sub>2</sub>** cluster compounds:** It is worth discussing the method used for the precise determination of the composition of the two obtained cluster compounds of **Eu<sub>2</sub>Ir<sub>2</sub>** and **Eu<sub>2</sub>Flr<sub>2</sub>**. The first evidence on their composition was provided by the results of the SC-XRD data, which were successfully gathered and analyzed for **Eu<sub>2</sub>Ir<sub>2</sub>** (see Structural studies, as well as Fig. S5 and Table S1, below). The analogous analysis was unsuccessful for **Eu<sub>2</sub>Flr<sub>2</sub>**, but the P-XRD data proved that this compound is isostructural to **Eu<sub>2</sub>Ir<sub>2</sub>** (Fig. S6); thus, the conclusions from the SC-XRD analysis of **Eu<sub>2</sub>Ir<sub>2</sub>** were assumed to be valid for **Eu<sub>2</sub>Flr<sub>2</sub>**. From the SC-XRD data of **Eu<sub>2</sub>Ir<sub>2</sub>**, it can be undoubtedly stated that the molecular building unit (determined by taking into account the asymmetric unit and the symmetry elements) contains a single tetrametallic coordination (i.e., cyanido-bridged) cluster based on two Eu(III) and two Ir(III) complexes, i.e.,  $\{Eu_2Ir_2\}$ . For each such molecular cluster, two positively charged TBA<sup>+</sup> cations are present in the crystal structure (Fig. S5 and S39). Despite the large structural disorder detected in the crystal structure in the remaining space between the mentioned molecular components, no additional TBA<sup>+</sup> cation may be present in the structure due to its too large size and the lack of residual electron densities that could suggest its presence. Thus, the remaining space is occupied by the weakly bonded solvent molecules of crystallization. Most probably, there are water molecules of crystallization, whose a few representative positions with



partial occupancies were found. The other solvent used in the synthesis, i.e., acetonitrile, was not found in the SC-XRD data. There was also no sign of its presence in the results of other measurements, such as IR spectra (Fig. S1). Therefore, it can be concluded that the coordination  $\{\text{Eu}_2\text{Ir}_2\}$  cluster should reveal the overall negative charge of (2–) to complete the neutral composition of the whole material, assuming that no other, i.e., besides  $\text{TBA}^+$ , counter-ions (e.g.,  $\text{OH}^-$  or  $\text{H}_3\text{O}^+$ , which could have been difficult to detect by the accessible SC-XRD data) exist in the crystal structure. With this information, we attempted to analyze the crucial composition of the  $\{\text{Eu}_2\text{Ir}_2\}$  cluster. It was found to be a difficult task due to the large structural disorder of the part of the clusters related to the nitrato ligands coordinated to Eu(III) centers. Most of their atoms had to be refined with two alternative positions with partial occupancies. Moreover, some of these nitrato ligands partially occupied the same position as the coordinated water molecule. In our initial attempts to describe this disordered part of the cluster, we found that presumably six nitrato ligands and one water molecule are present in the single  $\{\text{Eu}_2\text{Ir}_2\}$  cluster; however, taking into account the large structural disorder, these findings demanded additional evidence. Thus, we analyzed the other parts of the cluster, which were found from the SC-XRD data easily and without doubt on their number and integrity. In each cluster, we found two  $\text{Eu}^{3+}$  ions, two  $\text{Ir}^{3+}$  ions, four cyanido ( $\text{CN}^-$ ) ligands, and four *R,R*-pinppy ligands (each *R,R*-pinppy ligand reveals (1–) charge due to the deprotonation of a single C–H bond in the *R,R*-pinppyH precursor, which is a typical behavior for cyclometalated Ir(III) complexes, visible in the SC-XRD data, observed also in the precursor complex, and supported by the broad related literature, see ref. S1 and references therein; see the more detailed comment on this issue on Page S77 and the accompanying Fig. S42). Thus, the overall charge of non-nitrato molecular components (with the well-established charges) in the cluster can be calculated as follows:  $2 \times (3+) + 2 \times (3+) + 4 \times (1-) + 4 \times (1-) = (4+)$ . As mentioned above, two  $\text{TBA}^+$  cations correspond to each  $\{\text{Eu}_2\text{Ir}_2\}$  cluster. Thus, to fulfill the requirement of the neutrality of the whole material, six  $\text{NO}_3^-$  anions should be present in each cluster, which agrees with our findings from the initial analysis of the SC-XRD data. Following these considerations, we described the structural disorder of the nitrato ligands accordingly, finding six nitrato ligands and a single water molecule corresponding to each  $\{\text{Eu}_2\text{Ir}_2\}$  cluster. In such a case, the combined charge of all cationic molecular components of the material is well balanced by the combined charge of all embedded anionic molecular components, leading to the neutral composition of the whole material. The precise analysis of the charges of all components of the molecular building unit of **Eu<sub>2</sub>Ir<sub>2</sub>** is presented in Fig. S39 and Table S30 (see below). This output leads to the presented composition of **Eu<sub>2</sub>Ir<sub>2</sub>** of  $(\text{TBA})_2\{[\text{Eu}^{\text{III}}(\text{NO}_3)_3(\text{H}_2\text{O})_{0.5}]_2[\text{Ir}^{\text{III}}(\text{CN})_2(\text{R,R-pinppy})_2]_2\} \cdot 2\text{H}_2\text{O}$  (note two non-coordinated water molecules were also found in the SC-XRD analysis, but they do not affect the charge balance). Therefore, the tetrametallic coordination cluster reveals the charge (2–) (Table S30) counter-balanced by two  $\text{TBA}^+$  cations. The analogous composition was proposed for the isostructural **Eu<sub>2</sub>Flr<sub>2</sub>**, i.e.,  $(\text{TBA})_2\{[\text{Eu}^{\text{III}}(\text{NO}_3)_3(\text{H}_2\text{O})_{0.5}]_2[\text{Ir}^{\text{III}}(\text{CN})_2(\text{R,R-Fpinppy})_2]_2\} \cdot n\text{H}_2\text{O}$  (the number of non-coordinated water molecules was not proposed due to the lack of the related SC-XRD data). Therefore, also for the second reported compound, the tetrametallic cluster was assumed to reveal the charge (2–) counter-balanced by two  $\text{TBA}^+$  cations.

The additional evidence of the proposed number of intracluster nitrato ligands (i.e., six per the formula unit) is provided by the CHN elemental analyses, which were found to confirm the proposed composition, only with a different number of water molecules of crystallization. This is not surprising, as only part of the water molecules of crystallization could have been detected crystallographically for **Eu<sub>2</sub>Ir<sub>2</sub>** due to their large structural disorder. More importantly, the number of water molecules of crystallization is not crucial in confirming the presence of the proposed number of nitrato ligands per the formula unit, as they do not affect the key C-to-N ratio. This ratio is dependent on the number of other molecular components, including those containing N-atoms (cyanido, nitrato, and pinppy ligand, as well as  $\text{TBA}^+$  cations) and those containing C-atoms (cyanido and pinppy ligands, as well as  $\text{TBA}^+$  cations, but not nitrato ligands). The calculated C-to-N ratios for the proposed formula are expected to be identical for **Eu<sub>2</sub>Ir<sub>2</sub>** and **Eu<sub>2</sub>Flr<sub>2</sub>**, as both these compounds contain 108 C-atoms and 16 N-atoms for the formula unit. This leads to the calculated C/N ratio of 5.8, which agrees well with the experimental ones that were found to be 5.9(2) and 6.0(2) for **Eu<sub>2</sub>Ir<sub>2</sub>** and **Eu<sub>2</sub>Flr<sub>2</sub>**, respectively.

Our findings on the formulas of **Eu<sub>2</sub>Ir<sub>2</sub>** and **Eu<sub>2</sub>Flr<sub>2</sub>**, including the postulated composition and the overall (2–) charge of the incorporated tetrametallic cluster moiety, are supported by the comparison with the previously reported compounds.<sup>S1, S29</sup> In 2024, we reported the La<sup>III</sup>-containing structural analog of **Eu<sub>2</sub>Ir<sub>2</sub>**, i.e.,  $(\text{TBA})_2\{[\text{La}^{\text{III}}(\text{NO}_3)_3(\text{H}_2\text{O})_{0.5}]_2[\text{Ir}^{\text{III}}(\text{CN})_2(\text{R,R-pinppy})_2]_2\}$  (**La<sub>2</sub>Ir<sub>2</sub>**). They contain the analogous tetrametallic clusters based on two  $\text{La}^{3+}$  ions (instead of  $\text{Eu}^{3+}$ , presented in this work), two  $\text{Ir}^{3+}$  ions, four *R,R*-pinppy ligands, and four cyanido ligands, which were postulated to be completed with six nitrato ligands, leading to the overall (2–) charge, counter-balanced by two  $\text{TBA}^+$  cations (Fig. S39 and Table S30). Thus, the analogous case as described above was found in our previous work, including also the significant structural disorder detected in the part of the molecular cluster related to coordinated nitrato anions. The considerations and conclusions were analogous to what is presented above. Moreover, in 2012, M. D. Ward et al. reported the structurally similar compound of  $(\text{PPN})_2\{[\text{Eu}^{\text{III}}(\text{NO}_3)_3(\text{H}_2\text{O})_{0.5}]_2[\text{Ir}^{\text{III}}(\text{CN})_2(\text{ppy})_2]_2\} \cdot 5\text{MeCN}$  (PPN = bis

(triphenylphosphine)iminium, ppy = a carbanion of 2-phenylpyridine, Fig. S39). This compound was based on dicyanido  $\text{Ir}^{\text{III}}$  complexes with the non-chiral ppy ligands instead of *R,R*-pinppy ligands, which are presented here. The different counter-ion of  $\text{PPN}^+$  was also used instead of  $\text{TBA}^+$  ions, explored in this work. However, even with these changes, the mentioned compound reveals an analogous crystal structure to the reported materials. It also contains tetrametallic coordination clusters  $\{\text{Eu}_2\text{Ir}_2\}$  built of two  $\text{Eu}^{3+}$  ions, two  $\text{Ir}^{3+}$  ions, four ppy ligands (each with the (1–) charge), four cyanido ligands, and six nitrato ligands. They altogether lead to the overall (2–) charge of the cluster, identical to those found in  $\text{Eu}_2\text{Ir}_2$  and  $\text{Eu}_2\text{Flr}_2$ , and the mentioned  $\text{La}_2\text{Ir}_2$  (Fig. S39, Table S30). This charge is counter-balanced by two organic counter-ions of  $\text{PPN}^+$ . The cluster's charge in the work of M. D. Ward et al. was more precisely identified due to the lack of structural disorder within the cluster and the lowered crystal symmetry (i.e., a  $P\bar{1}$  space group of a triclinic crystal system versus a  $P6_222$  space group of a hexagonal crystal system for  $\text{Eu}_2\text{Ir}_2$  in this work). As a result of both mentioned effects, there were no overlapping positions of nitrato ligands and coordinated water molecules, and the determination of the positions of all related atoms was very certain. The resulting number of these components per the formula unit, i.e., six nitrato ligands and one coordinated water molecule, is identical to those proposed for the compounds reported here. This additionally indicates the tendency of the investigated tetrametallic cyanido-bridged clusters to crystallize in the form of (2–) molecular anions, as was postulated and discussed above.

**Comment on the air stability of *R,R*-Ir, *R,R*-Flr,  $\text{Eu}_2\text{Ir}_2$ , and  $\text{Eu}_2\text{Flr}_2$ :** All the obtained materials change the solvent content upon exposure to air. However, this solvent change is slow and does not modify the respective P-XRD patterns (Fig. S6). Thus, the integrity of the structural features upon exposure to air can be postulated. However, to prevent eventual problems in the data interpretation, for all crucial optical measurements, the freshly prepared powder samples of the presented compounds were used, which eliminates the role of the variation in the solvent content as much as possible.

## Structural studies

Single crystal X-ray diffraction (SC-XRD) analyses of *R,R*-FpinppyH, *R,R*-Flr, and  $\text{Eu}_2\text{Ir}_2$  were performed at 100(2) K, ensured by the CRYOStream 800 Plus system, using the Bruker D8 Quest Eco Photo50 CMOS diffractometer, equipped with a molybdenum X-ray lamp (Mo  $\text{K}\alpha$  0.71073 Å), TRIUMPH monochromator, and CPAD Photon II detector. The single crystals of the respective compound were taken directly from the mother liquid, covered in Apiezon® N grease, and mounted on the Micro Mounts™ holder. The crystal structures were solved by an intrinsic phasing method using the SHELXT program within the Apex3 package.<sup>52</sup> The crystal structures were refined within the WinGx software (ver. 2021.3) by the application of a weighted full-matrix least squares method on  $F^2$ .<sup>53</sup> All non-hydrogen metals were refined anisotropically, while hydrogen atoms were calculated in their ideal positions and refined using the riding model. In a few special cases, hydrogen atoms were found directly from the electron density map. A reasonable number of DFIX, ISOR, and DELU restraints were applied for some of the most disordered atoms to ensure proper geometry and convergence of the refinement process. This was necessary as, especially in the case of  $\text{Eu}_2\text{Ir}_2$ , a large structural disorder was detected. By applying all of these procedures, satisfactory refinement parameters for all reported crystal structures were obtained. For  $\text{Eu}_2\text{Ir}_2$ , two structural A-type alerts remained, which were thoroughly explained in the CIF file along with the B-type alerts that are present both in  $\text{Eu}_2\text{Ir}_2$  as well as *R,R*-Flr (see respective CIF files for details). In addition, due to the non-negligible structural disorder, larger in  $\text{Eu}_2\text{Ir}_2$  and smaller in *R,R*-Flr, the respective Flack x-parameters deviate from the ideal value of zero. They are, however, at the very low levels of 0.066(6) and 0.025(3) for  $\text{Eu}_2\text{Ir}_2$  and *R,R*-Flr, respectively, as expected for the enantiopure compounds. The SC-XRD data of all investigated compounds, *R,R*-FpinppyH, *R,R*-Flr, and  $\text{Eu}_2\text{Ir}_2$ , were deposited in the CCDC database with numbers 2420768, 2420770, and 2420769, respectively. The details of the refinement process and crystal data are summarized in Table S1, while the detailed structure parameters were gathered in Tables S2 and S3. Fig. 1 and S3–S5 visualize the crystal structures of the obtained compounds. They were prepared using Mercury 2022.3 software. Powder X-ray diffraction (P-XRD) experiments were performed on a Bruker D8 Advance ECO diffractometer equipped with a Cu  $\text{K}\alpha$  lamp (X-ray wavelength of 1.5419 Å) and an SSD160 detector. Polycrystalline samples of all compounds were ground, inserted into a 0.5 mm glass capillary, and mounted into the diffractometer. All the measurements were performed at room temperature in the transmission mode with an appropriate setup for rotating capillaries.

## Physical techniques

$^1\text{H}$  and  $^{13}\text{C}\{^1\text{H}\}$  NMR spectra were recorded for solutions in  $\text{CDCl}_3$  containing TMS ( $\text{Me}_4\text{Si}$ ) as an internal standard, at room temperature, by using a Jeol 400 MHz ECZR spectrometer. CHN elemental analyses were performed with standard microanalysis procedures using the Elementar Vario Micro Cube CHN analyzer. The infrared (IR) absorption spectra were collected on a Nicolet iN10 MX FT-IR microscope in transmission mode. Measurements were made in the range of 3800–670  $\text{cm}^{-1}$  for selected single crystals on a  $\text{BaF}_2$  window. Thermogravimetric (TG) measurements were performed on a NETZSCH TG 209 F1 Libra apparatus under inert gas ( $\text{N}_2$ ) at a heating rate of 1  $^\circ\text{C}\cdot\text{min}^{-1}$  in the

temperature range of 20–400 °C. The ESI-TOF mass spectra (MS) were gathered for the acetonitrile solutions of the investigated compounds using a microTOF-II mass spectrometer of Bruker Daltonics.

The second harmonic generation (SHG) activity was checked using a homemade optical setup equipped with a 1040 nm femtosecond laser as an excitation light source.<sup>54</sup> To verify the SHG origin of the output light, its power and wavelength dependencies were measured. To quantify the SH intensities, a potassium dihydrogen phosphate (KDP) was used as a reference sample under identical experimental conditions.

Solid-state UV-vis absorption spectra were measured in the range of 220–750 nm on a Shimadzu UV-3600i plus spectrometer using the thin films of the powder samples of respective compounds inserted between quartz plates. Solid-state photoluminescent properties were measured using an FS5 spectrofluorometer equipped with an Xe (150 W) arc lamp as an excitation source and a Hamamatsu photomultiplier of the R928P type as a detector. Emission lifetime measurements were conducted on the FS5 spectrofluorometer using a time-correlated single photon counting method with an EPLED-380 picosecond pulsed light-emitting diode (wavelength of 374.4 nm). Absolute photoluminescence quantum yields (PL-QYs) were determined using a direct excitation method with an integrating sphere module for the FS5 spectrofluorometer.<sup>55</sup> The temperature-variable emission and excitation spectra were collected on the same spectrofluorometer using a CS204SI-FMX-1SS cooling power optical helium cryostat equipped with a DE-204SI closed cycle cryo-cooler (cold head), water-cooled He compressor (ARS-4HW model), and the model 335 cryogenic temperature controller. Luminescent background corrections were performed within the Fluoracle software provided by Edinburgh Instruments.

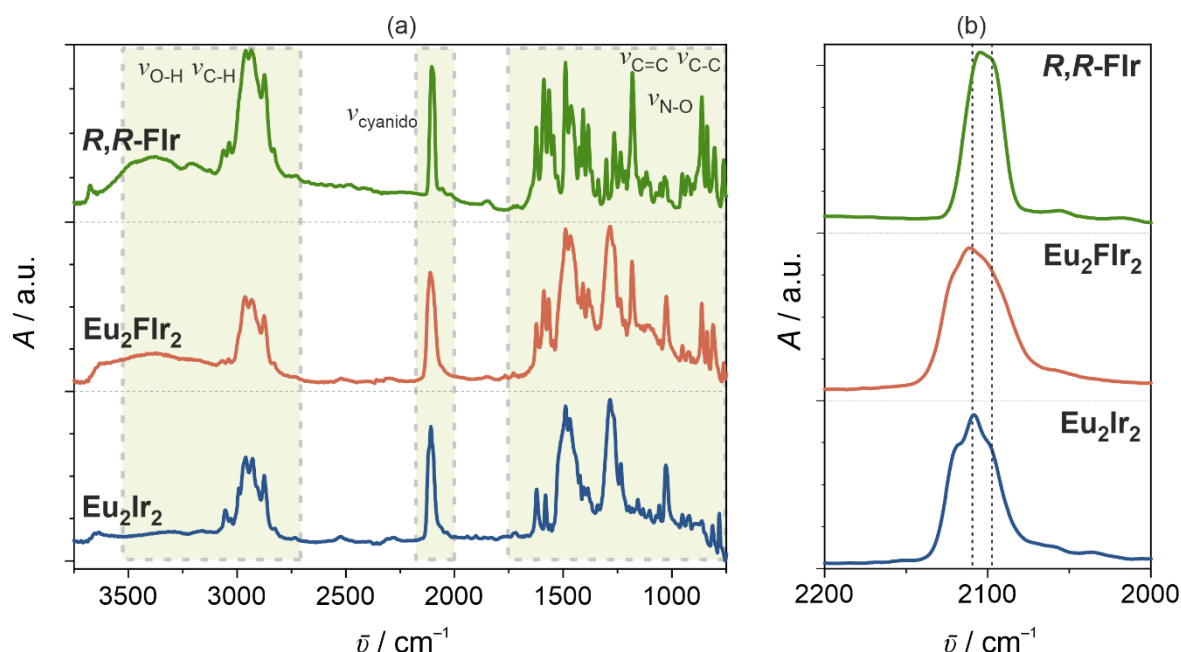

**Fig. S1** Infrared (IR) absorption spectra for the crystalline samples of *R,R*-Flr,  $\text{Eu}_2\text{Flr}_2$ , and  $\text{Eu}_2\text{Ir}_2$ , presented in the broad range of 3750–750  $\text{cm}^{-1}$  (a) and the limited range of 2200–2000  $\text{cm}^{-1}$  that corresponds to the stretching vibrations of cyanido ligands (b). The vertical dotted lines in (b) visualize the shift of the maxima going from *R,R*-Flr to  $\text{Eu}_2\text{Flr}_2$  and  $\text{Eu}_2\text{Ir}_2$ .

**Comment to Fig. S1:** Absorption of IR light in the range of 3150–2600  $\text{cm}^{-1}$  is related to stretching vibrations  $\nu(\text{C-H})$  of the aromatic and aliphatic parts of organic ligands, cations, and solvent molecules. The IR spectra in the 1700–670  $\text{cm}^{-1}$  range are composed of many characteristic absorption peaks connected with skeletal vibrations such as  $\nu(\text{C-C})$ ,  $\nu(\text{N=O})$ , and  $\nu(\text{N-O})$ . In part (b), the peaks corresponding to the characteristic stretching vibrations of cyanido ligands are presented. There is a shift of these absorption going from *R,R*-Flr to  $\text{Eu}_2\text{Flr}_2$  and  $\text{Eu}_2\text{Ir}_2$  which agrees well with the structural data as the *R,R*-Flr compound contains only the terminal cyanido ligands whose stretching vibrations are of lower energy while  $\text{Eu}_2\text{Flr}_2$  and  $\text{Eu}_2\text{Ir}_2$  contain only the bridging cyanido ligands whose stretching vibrations are expected to be of higher energy. This is a typical trend observed for cyanido stretching vibrations in the family of polycyanidometallate-based coordination compounds.<sup>S1,S6</sup>

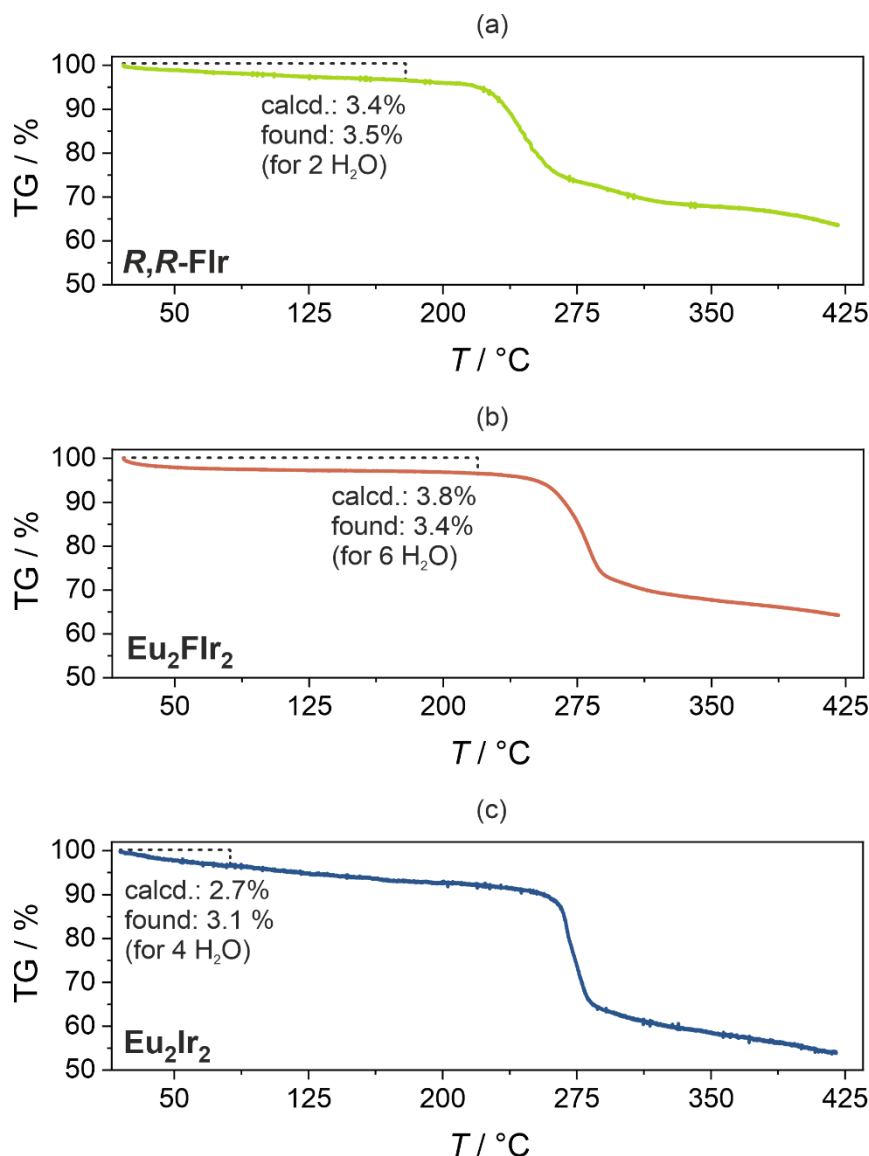

**Fig. S2** Thermogravimetric (TG) curves for crystalline samples of ***R,R*-Flr**, **Eu<sub>2</sub>Flr<sub>2</sub>**, and **Eu<sub>2</sub>Ir<sub>2</sub>** (a–c, respectively), collected in the range of 20–420 °C. On each curve, the calculated and experimental steps related to the removal of solvent molecules of crystallization are depicted.

**Comment to Fig. S2:** The data gathered in the figure above were measured for polycrystalline samples, which were filtered and left in air for a few hours. As indicated by the CHN analyses, all investigated compounds contain water molecules of crystallization. The TG analyses confirm the presence of solvent molecules. The related steps in the thermogravimetric curves can be observed, and they are depicted on the graphs. In all cases, there is a gradual, relatively small decrease in the sample weight (TG) upon heating as only the weakly solvent molecules of crystallization (water) are removed. For ***R,R*-Flr** and **Eu<sub>2</sub>Flr<sub>2</sub>**, the observed mass change within the broad, gradual heating-induced step corresponds well to the values expected for the water content indicated by the CHN analyses (see Experimental details). For **Eu<sub>2</sub>Ir<sub>2</sub>**, this gradual heating-induced step is deeper, so it can be interpreted by means of the further removal of other molecular components, e.g., coordinated water molecules and/or organic counter-ions. In all cases, at higher temperatures, above 250–275 °C, a much larger decrease in the sample mass is observed, which is related to the decomposition of the respective crystal structures.

**Table S1** Crystal data and structure refinement parameters for *R,R*-FpinppyH, *R,R*-Flr, and  $\text{Eu}_2\text{Ir}_2$ , compared with the analogous data for previously reported  $\text{TBA}[\text{Ir}^{\text{III}}(\text{CN})_2(\text{R,R-pinppy})_2] \cdot 2\text{MeCN}$  (*R,R*-Ir).<sup>S1</sup>

| Compound                                                                | <i>R,R</i> -FpinppyH                             | <i>R,R</i> -Flr                                    | $\text{Eu}_2\text{Ir}_2$                                                       | <i>R,R</i> -Ir [ref. S1]                           |
|-------------------------------------------------------------------------|--------------------------------------------------|----------------------------------------------------|--------------------------------------------------------------------------------|----------------------------------------------------|
| Formula                                                                 | $\text{C}_{18}\text{H}_{18}\text{FN}$            | $\text{C}_{58}\text{H}_{76}\text{F}_2\text{IrN}_7$ | $\text{C}_{108}\text{H}_{150}\text{Eu}_2\text{Ir}_2\text{N}_{16}\text{O}_{21}$ | $\text{C}_{58}\text{H}_{78}\text{IrN}_7$           |
| Formula weight / $\text{g}\cdot\text{mol}^{-1}$                         | 267.33                                           | 1101.45                                            | 2696.75                                                                        | 1065.47                                            |
| $T / \text{K}$                                                          | 100(2)                                           |                                                    |                                                                                |                                                    |
| $\lambda / \text{\AA}$                                                  | 0.71073 (Mo K $\alpha$ )                         |                                                    |                                                                                |                                                    |
| Crystal system                                                          | orthorhombic                                     | orthorhombic                                       | hexagonal                                                                      | orthorhombic                                       |
| Space group                                                             | $P 2_1 2_1 2_1$                                  | $P 2_1 2_1 2_1$                                    | $P 6_2 22$                                                                     | $P 2_1 2_1 2_1$                                    |
| $a / \text{\AA}$                                                        | 5.7780(3)                                        | 13.8335(7)                                         | 17.3485(8)                                                                     | 13.624(3)                                          |
| $b / \text{\AA}$                                                        | 12.3807(8)                                       | 14.0896(6)                                         | 17.3485(8)                                                                     | 14.206(2)                                          |
| $c / \text{\AA}$                                                        | 19.4561(12)                                      | 27.5937(13)                                        | 37.291(3)                                                                      | 27.254(5)                                          |
| $\alpha / ^\circ$                                                       | 90                                               | 90                                                 | 90                                                                             | 90                                                 |
| $\beta / ^\circ$                                                        | 90                                               | 90                                                 | 90                                                                             | 90                                                 |
| $\gamma / ^\circ$                                                       | 90                                               | 90                                                 | 120                                                                            | 90                                                 |
| $V / \text{\AA}^3$                                                      | 1391.81(14)                                      | 5378.2(4)                                          | 9719.8(11)                                                                     | 5275.0(16)                                         |
| $Z$                                                                     | 4                                                | 4                                                  | 3                                                                              | 4                                                  |
| Density / $\text{g}\cdot\text{cm}^{-3}$                                 | 1.276                                            | 1.360                                              | 1.382                                                                          | 1.342                                              |
| Crystal shape                                                           | block                                            | block                                              | block                                                                          | block                                              |
| Crystal size / mm x mm x mm                                             | 0.900 x 0.600 x 0.450                            | 0.470 x 0.170 x 0.120                              | 0.360 x 0.290 x 0.250                                                          | 0.150 x 0.140 x 0.130                              |
| Absorption coefficient / $\text{cm}^{-1}$                               | 0.083                                            | 2.533                                              | 3.066                                                                          | 2.575                                              |
| $F(000)$                                                                | 568                                              | 2272                                               | 4074                                                                           | 2208                                               |
| $\theta$ range / $^\circ$                                               | 2.663–25.015                                     | 2.537–25.025                                       | 2.348–25.034                                                                   | 2.554–35.027                                       |
| Limiting indices                                                        | $-6 < h < 6$<br>$-14 < k < 14$<br>$-23 < l < 23$ | $-16 < h < 16$<br>$-16 < k < 16$<br>$-32 < l < 32$ | $-20 < h < 18$<br>$-14 < k < 20$<br>$-44 < l < 43$                             | $-16 < h < 16$<br>$-16 < k < 16$<br>$-32 < l < 32$ |
| Collected reflections                                                   | 20763                                            | 149958                                             | 58162                                                                          | 61588                                              |
| Unique reflections                                                      | 2442                                             | 9483                                               | 5741                                                                           | 9286                                               |
| $R_{\text{int}}$                                                        | 0.0215                                           | 0.0400                                             | 0.0553                                                                         | 0.0455                                             |
| Completeness / %                                                        | 99.1                                             | 99.9                                               | 99.7                                                                           | 99.7                                               |
| Flack $x$ -parameter                                                    | −0.06(16)                                        | 0.025(3)                                           | 0.066(6)                                                                       | 0.015(3)                                           |
| Data/restraints/parameters                                              | 2442/0/181                                       | 9483/32/631                                        | 5741/142/382                                                                   | 9286/0/597                                         |
| GOF on $F^2$                                                            | 1.061                                            | 1.121                                              | 1.262                                                                          | 1.088                                              |
| Final $R$ indices ( $R_1$ for $[I > 2\sigma(I)]$ , $wR_2$ for all data) | $R_1 = 0.029$<br>$wR_2 = 0.077$                  | $R_1 = 0.0264$<br>$wR_2 = 0.0626$                  | $R_1 = 0.0723$<br>$wR_2 = 0.1786$                                              | $R_1 = 0.0244$<br>$wR_2 = 0.0524$                  |
| Largest diff. peak and hole / $\text{e}\cdot\text{\AA}^{-3}$            | 0.161<br>−0.140                                  | 0.959<br>−0.787                                    | 1.001<br>−2.560                                                                | 0.907<br>−1.087                                    |

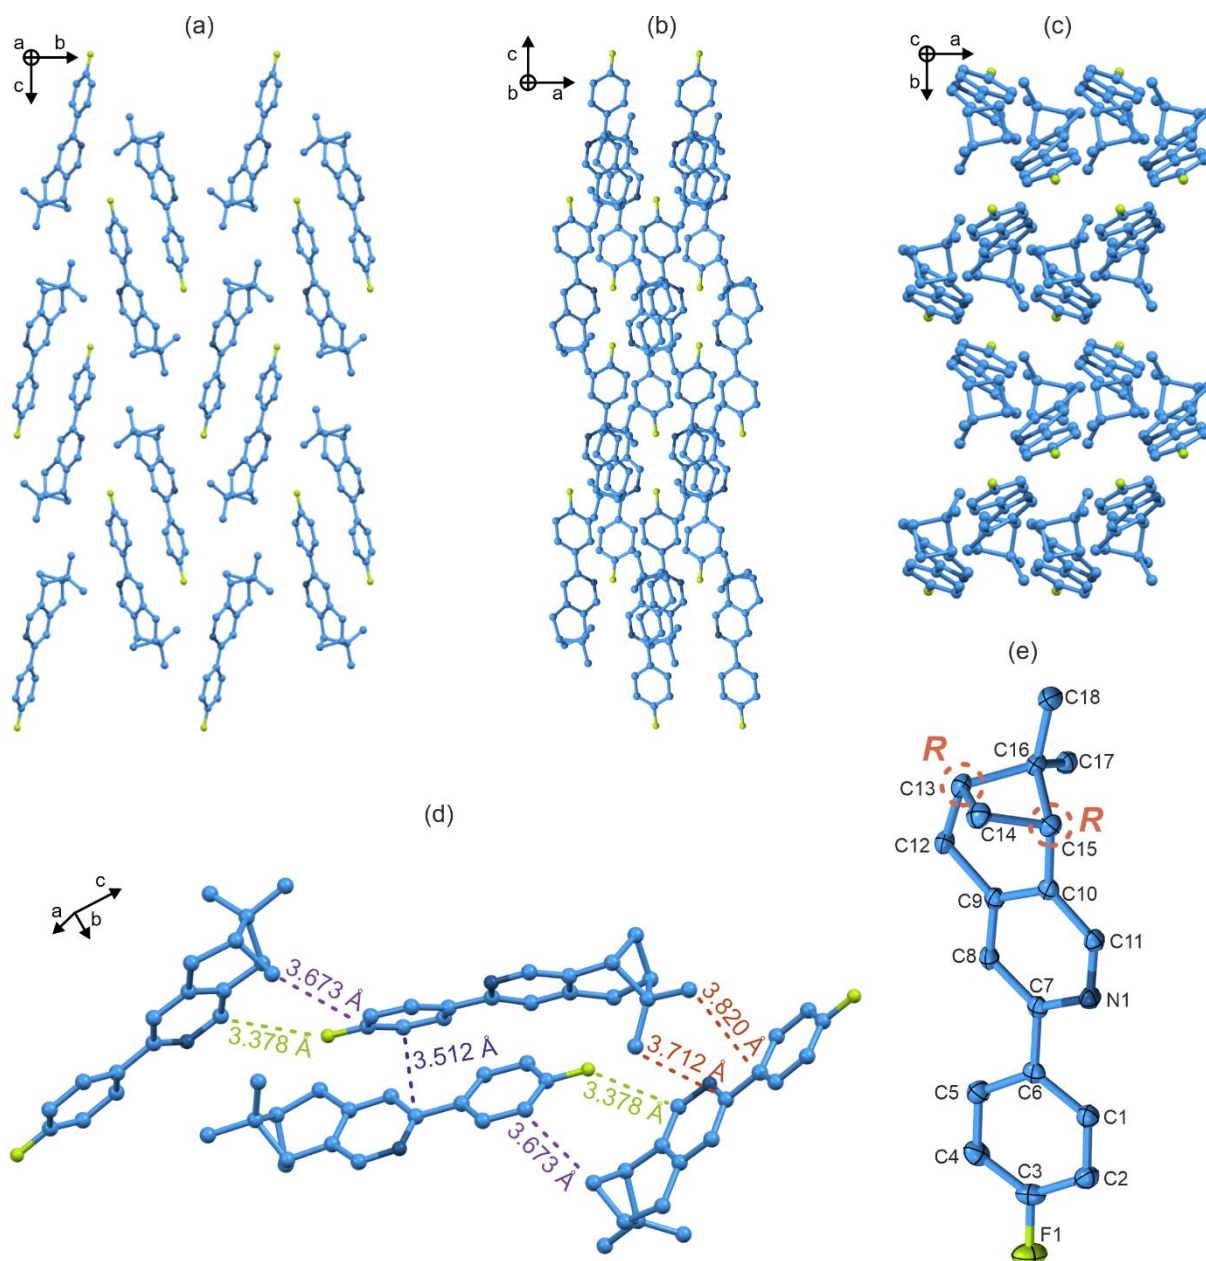

**Fig. S3** The representative views of the crystal structure of *R,R*-FpinppyH, including its presentation along main crystallographic axes (*a*, *b*, and *c*), the detailed insight into the intermolecular interaction with the depicted closest intermolecular distances (d), and the asymmetric unit of the structure with thermal ellipsoids of atoms shown at the 50% probability level (the atoms labeling scheme is additionally presented; hydrogen atoms were omitted for clarity) (e). The chirality of the ligand is depicted in the (e) part.



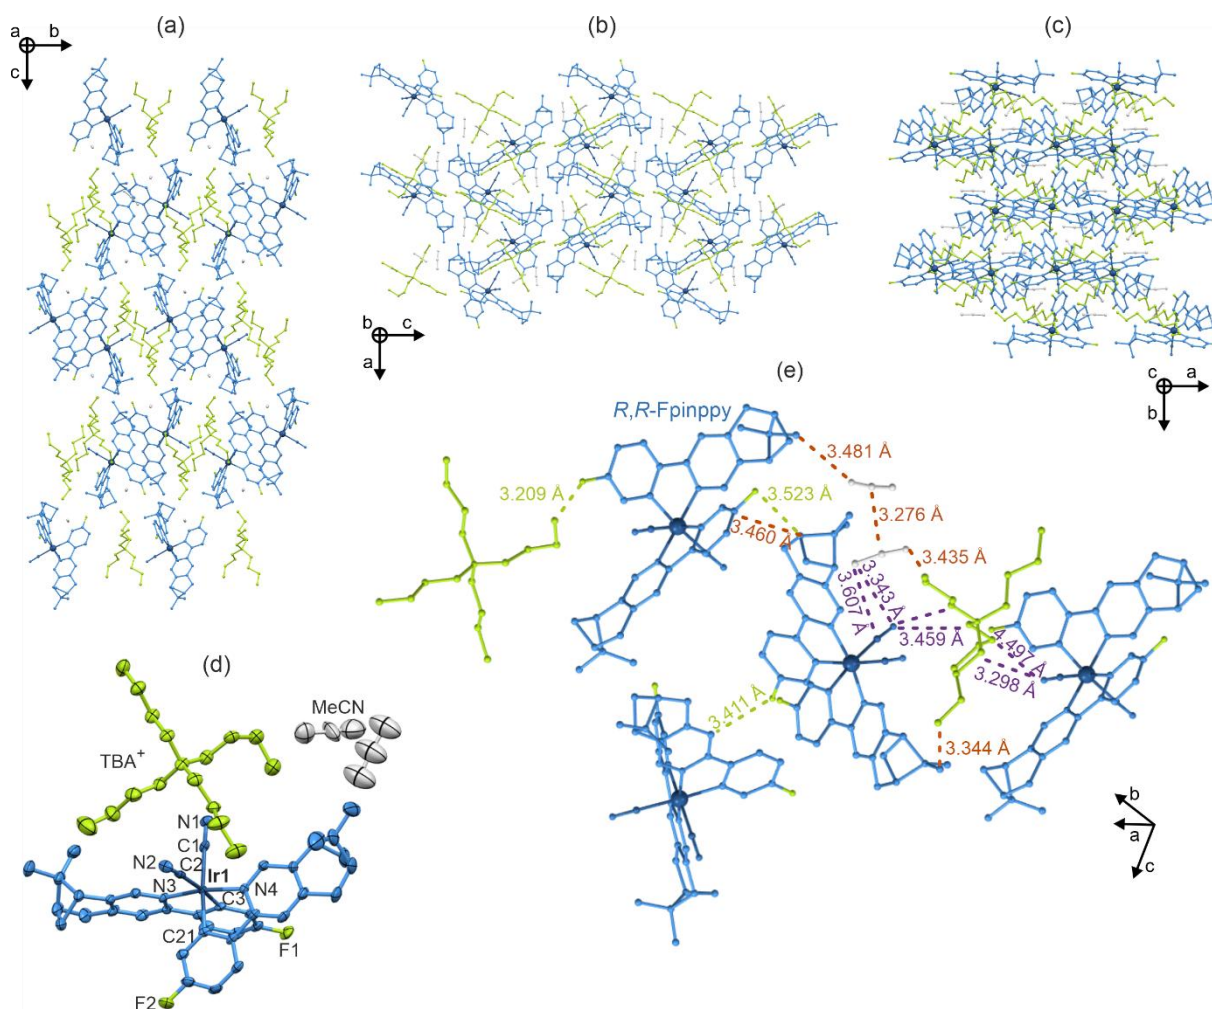

**Fig. S4** Representative views of the crystal structure of *R,R*-Flr, including its presentation along main crystallographic axes (*a*, *b*, and *c*), the detailed insight into the asymmetric unit with the atoms presented with their thermal ellipsoids (50% probability level) and labeling scheme (d), and the view on the intermolecular contacts between cationic and anionic molecular building blocks (e). Hydrogen atoms were omitted everywhere for clarity.

**Table S2** Selected detailed structure parameters of *R,R*-Flr.

| Selected bond distances in <i>cis</i> -[Ir1(CN) <sub>2</sub> ( <i>R,R</i> -Fpinppy) <sub>2</sub> ] <sup>−</sup> complexes / Å |          |                   |          |                   |          |
|-------------------------------------------------------------------------------------------------------------------------------|----------|-------------------|----------|-------------------|----------|
| <b>Ir1–C1</b>                                                                                                                 | 2.052(6) | <b>Ir1–C3</b>     | 2.047(5) | <b>Ir1–N3</b>     | 2.059(5) |
| <b>Ir1–C2</b>                                                                                                                 | 2.057(6) | <b>Ir1–C21</b>    | 2.048(6) | <b>Ir1–N4</b>     | 2.051(5) |
| Selected angles in <i>cis</i> -[Ir1(CN) <sub>2</sub> ( <i>R,R</i> -Fpinppy) <sub>2</sub> ] <sup>−</sup> complexes / °         |          |                   |          |                   |          |
| <b>C1–Ir1–C2</b>                                                                                                              | 87.9(2)  | <b>C2–Ir1–C3</b>  | 173.7(2) | <b>C3–Ir1–N3</b>  | 80.0(2)  |
| <b>C1–Ir1–C3</b>                                                                                                              | 93.1(2)  | <b>C2–Ir1–C21</b> | 90.5(2)  | <b>C3–Ir1–N4</b>  | 90.8(2)  |
| <b>C1–Ir1–C21</b>                                                                                                             | 173.5(3) | <b>C2–Ir1–N3</b>  | 93.8(2)  | <b>C21–Ir1–N3</b> | 94.8(2)  |
| <b>C1–Ir1–N3</b>                                                                                                              | 91.6(2)  | <b>C2–Ir1–N4</b>  | 95.3(2)  | <b>C21–Ir1–N4</b> | 79.8(2)  |
| <b>C1–Ir1–N4</b>                                                                                                              | 94.1(2)  | <b>C3–Ir1–C21</b> | 89.1(2)  | <b>N3–Ir1–N4</b>  | 169.4(2) |

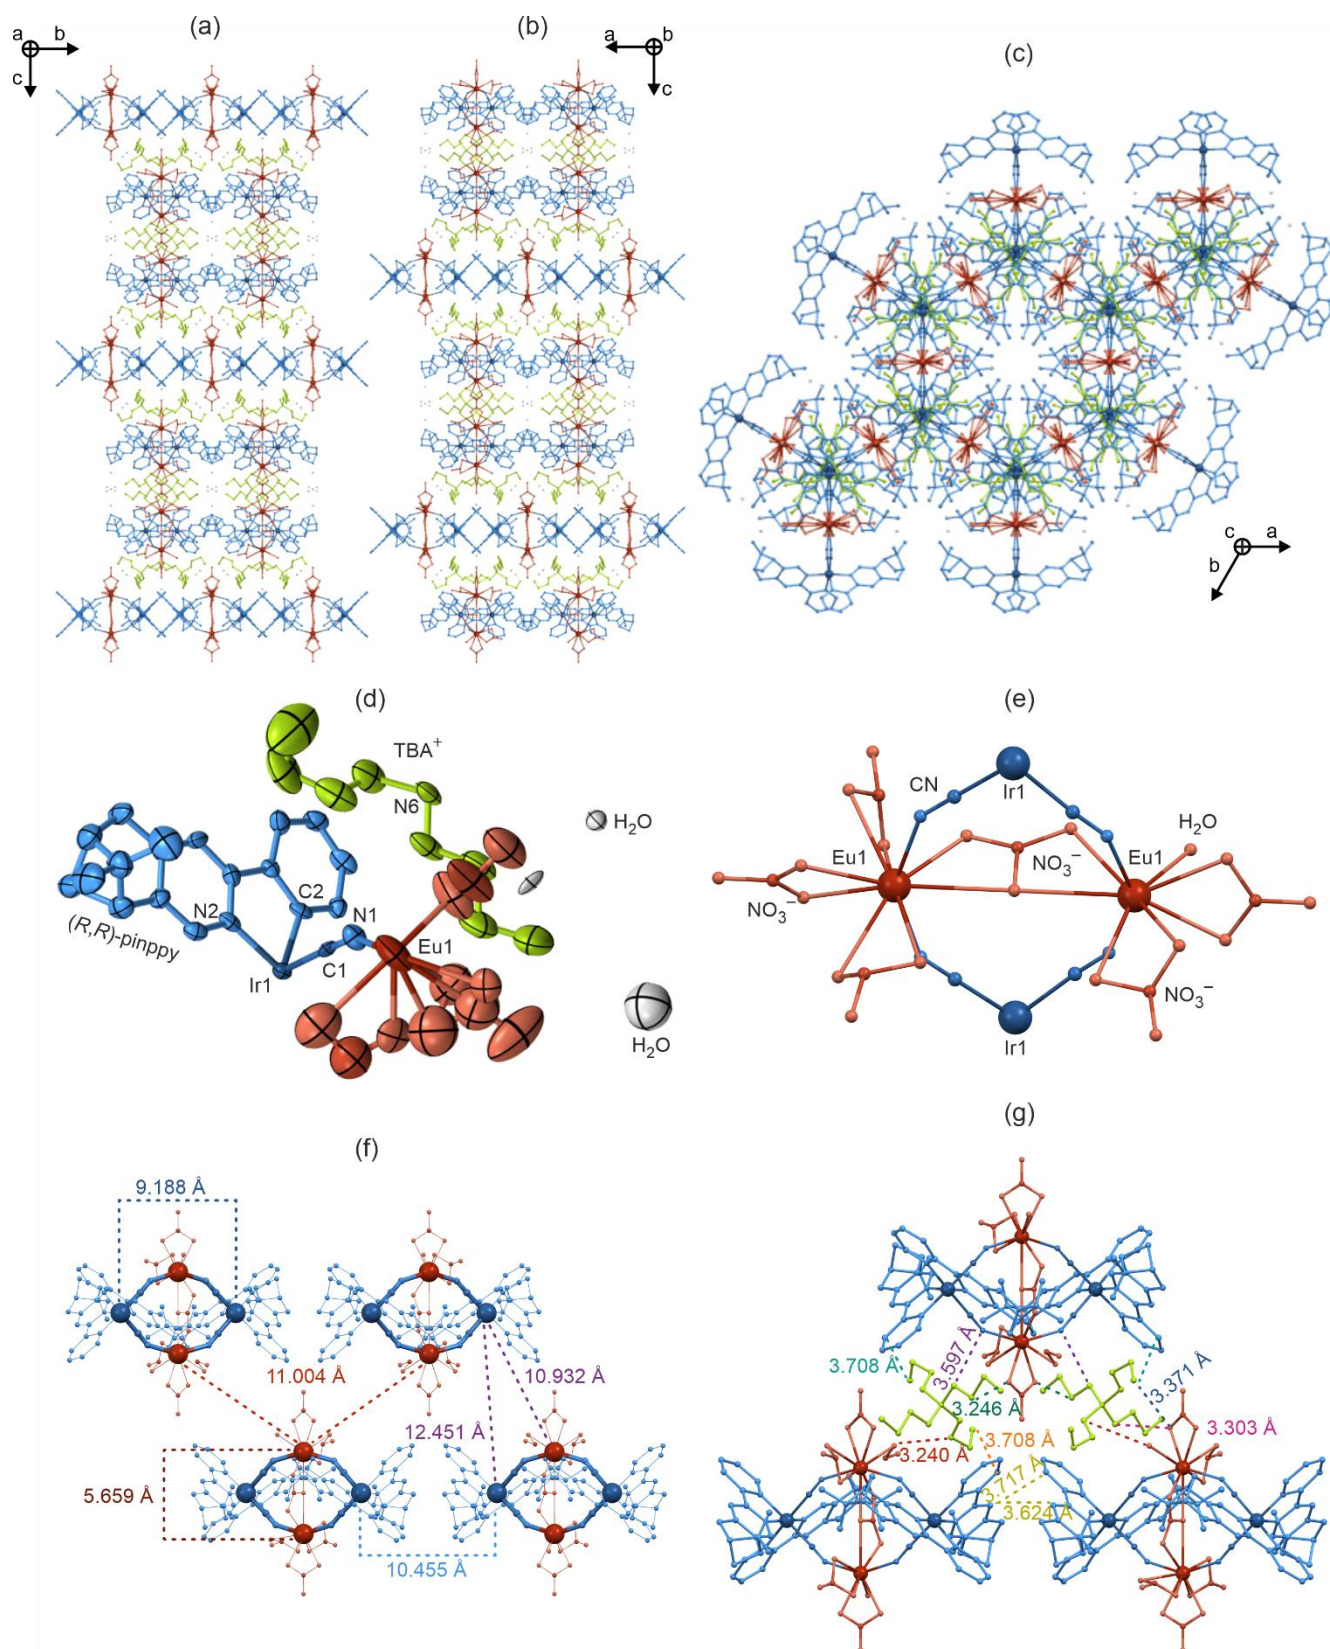

**Fig. S5** Representative views of the crystal structure of  $\text{Eu}_2\text{Ir}_2$ , including its presentation along main crystallographic axes (a, b, and c), the detailed view of the asymmetric unit with the atoms presented by thermal ellipsoids at the 40% probability level (d), the visualization of the arrangement of bridging nitrato and cyanido ligands within the molecular anions (e), the visualization of the intercluster interactions within the structure (f), and the analogous view of the intermolecular interactions between the cationic and anionic components embedded in the structure (g). Hydrogen atoms were omitted everywhere for clarity.

**Table S3** Selected detailed structure parameters of  $\text{Eu}_2\text{Ir}_2$ .

| Selected bond distances and angles in $\text{cis-}[\text{Ir1}(\mu\text{-CN})_2(\text{R,R-pinppy})_2]^-$ complexes / Å, °                                                                                                                                    |                        |                  |                                                                                                                         |                  |                         |
|-------------------------------------------------------------------------------------------------------------------------------------------------------------------------------------------------------------------------------------------------------------|------------------------|------------------|-------------------------------------------------------------------------------------------------------------------------|------------------|-------------------------|
| <b>Ir1–C1</b>                                                                                                                                                                                                                                               | 2.050(17)              | <b>Ir1–C2</b>    | 2.062(14))                                                                                                              | <b>Ir1–N2</b>    | 2.045(15)               |
| <b>C1–Ir1–C1</b>                                                                                                                                                                                                                                            | 87.3(9)                | <b>C1–Ir1–N2</b> | 95.6(6) /<br>88.9(6)                                                                                                    | <b>C2–Ir1–N2</b> | 80.7(6) /<br>94.7(7)    |
| <b>C1–Ir1–C2</b>                                                                                                                                                                                                                                            | 92.2(6) /<br>176.3(8)  | <b>C2–Ir1–C2</b> | 88.5(8)                                                                                                                 | <b>N2–Ir1–N2</b> | 173.7(7)                |
| Selected bond distances and angles in $[\text{Eu1}(\mu\text{-NC})_2(\kappa^2\text{-NO}_3)_3(\mu,\kappa^2\text{-NO}_3)]^{3-}$ and $[\text{Eu1}(\mu\text{-NC})_2(\kappa^2\text{-NO}_3)_2(\mu,\kappa^2\text{-NO}_3)(\text{H}_2\text{O})]^{2-}$ complexes / Å ° |                        |                  |                                                                                                                         |                  |                         |
| <b>Eu1–N1</b>                                                                                                                                                                                                                                               | 2.411(15)              | <b>N1–Eu1–O7</b> | 78.6(9) /<br>81.7(10)                                                                                                   | <b>O3–Eu1–O8</b> | 73.10                   |
| <b>Eu1–O1</b>                                                                                                                                                                                                                                               | 2.43(2)                | <b>N1–Eu1–O8</b> | 75.11                                                                                                                   | <b>O4–Eu1–O4</b> | 126.0(5)                |
| <b>Eu1–O3</b>                                                                                                                                                                                                                                               | 2.62(3)                | <b>O1–Eu1–O1</b> | 53.7(11)                                                                                                                | <b>O4–Eu1–O5</b> | 50.32(8) /<br>120.4(3)  |
| <b>Eu1–O4</b>                                                                                                                                                                                                                                               | 2.627(6)               | <b>O1–Eu1–O3</b> | 94.6(17) /<br>116.0(12)                                                                                                 | <b>O4–Eu1–O7</b> | 73.0(10) /<br>153.4(8)  |
| <b>Eu1–O5</b>                                                                                                                                                                                                                                               | 2.687(6)               | <b>O1–Eu1–O4</b> | 66.1(10) /<br>66.1(9)                                                                                                   | <b>O4–Eu1–O8</b> | 117.01                  |
| <b>Eu1–O7</b>                                                                                                                                                                                                                                               | 2.42(4)                | <b>O1–Eu1–O5</b> | 62.0(9) /<br>102.1(9)                                                                                                   | <b>O5–Eu1–O5</b> | 163.25                  |
| <b>Eu1–O8</b>                                                                                                                                                                                                                                               | 2.830                  | <b>O1–Eu1–O7</b> | 138.3(13) /<br>115.8(14)                                                                                                | <b>O5–Eu1–O7</b> | 53.8(11) /<br>141.5(11) |
| <b>N1–Eu1–N1</b>                                                                                                                                                                                                                                            | 150.2(7)               | <b>O1–Eu1–O8</b> | 153.28                                                                                                                  | <b>O5–Eu1–O8</b> | 98.37                   |
| <b>N1–Eu1–O1</b>                                                                                                                                                                                                                                            | 80.5(6)/<br>128.6(6)   | <b>O3–Eu1–O3</b> | 146.2(17)                                                                                                               | <b>O7–Eu1–O7</b> | 97(2)                   |
| <b>N1–Eu1–O3</b>                                                                                                                                                                                                                                            | 86.3(16) /<br>85.1(19) | <b>O3–Eu1–O4</b> | 49.9(6) /<br>155.1(18)                                                                                                  | <b>O7–Eu1–O8</b> | 48.62                   |
| <b>N1–Eu1–O4</b>                                                                                                                                                                                                                                            | 76.6(14)/<br>114.8(13) | <b>O3–Eu1–O5</b> | 35.3(17) /<br>154.2(19)                                                                                                 | <b>C1–N1–Eu1</b> | 148.9(14)               |
| <b>N1–Eu1–O5</b>                                                                                                                                                                                                                                            | 75.6(5) /<br>118.9(5)  | <b>O3–Eu1–O7</b> | 24.7(12) /<br>121.6(15)                                                                                                 | -                | -                       |
| Selected distances and angles between metal centers within the $\{\text{Eu}^{\text{III}}_2\text{Ir}^{\text{III}}_2\}$ clusters / Å °                                                                                                                        |                        |                  | Selected distances between metal centers within the $\{\text{Eu}^{\text{III}}_2\text{Ir}^{\text{III}}_2\}$ clusters / Å |                  |                         |
| <b>Eu1–Eu1</b>                                                                                                                                                                                                                                              | 5.659                  |                  | <b>Eu1–Eu1</b><br>(in [021] and [02-1])                                                                                 | 11.004           |                         |
| <b>Eu1–Ir1</b>                                                                                                                                                                                                                                              | 5.396                  |                  | <b>Eu1–Eu1</b><br>(in [100] and [010])                                                                                  | 17.349           |                         |
| <b>Ir1–Ir1</b>                                                                                                                                                                                                                                              | 9.188                  |                  | <b>Ir1–Ir1</b> (in [001])                                                                                               | 12.451           |                         |
| <b>Eu1–Ir1–Eu1</b>                                                                                                                                                                                                                                          | 63.26                  |                  | -                                                                                                                       | -                |                         |
| <b>Ir1–Eu1–Ir1</b>                                                                                                                                                                                                                                          | 116.74                 |                  | -                                                                                                                       | -                |                         |

**Table S4** Results of Continuous Shape Measure (CShM) analysis for six-coordinated Ir(III) complexes in ***R,R*-Flr** and ***Eu*<sub>2</sub>Ir<sub>2</sub>**.

| Compound                                   | CShM parameter* |        |              |        |        | Geometry    |
|--------------------------------------------|-----------------|--------|--------------|--------|--------|-------------|
|                                            | HP-6            | PPY-6  | OC-6         | TPR-6  | JPPY-6 |             |
| <b><i>R,R</i>-Flr</b>                      | 30.400          | 26.347 | <b>0.570</b> | 14.050 | 30.239 | <b>OC-6</b> |
| <b><i>Eu</i><sub>2</sub>Ir<sub>2</sub></b> | 28.566          | 27.725 | <b>0.454</b> | 15.783 | 31.146 | <b>OC-6</b> |

**Comment on Table S4:** Continuous Shape Measure (CShM) analysis for the Ir(III) and Eu(III) complexes was performed using SHAPE software ver. 2.1.21.<sup>57</sup> The Continuous Shape Measure (CShM) parameter represents the distortion from ideal geometry. It equals 0 for an ideal polyhedron and increases with increasing distortion. Due to the significant disorder in the crystal structure of ***Eu*<sub>2</sub>Ir<sub>2</sub>** (see Experimental section above), some DFIX restraints were applied for the Eu–O bond distances to ensure its proper geometry and the convergence of the refinement procedure. Therefore, the CShM analysis is strongly affected providing a large error. Thus, the results for the Eu(III) complexes are not presented (9- and 10-coordinated complexes were considered). However, for the record, the geometries for the nine-coordinated Eu(III) complexes in ***Eu*<sub>2</sub>Ir<sub>2</sub>** were found the best described by the strongly distorted MFF-9 (muffin, *C<sub>s</sub>*), while the ten-coordinated complexes are best characterized by the geometry of strongly deformed JSPC-10 (sphenocorona, *C<sub>2v</sub>*). On the other hand, the Ir(III) complexes in both ***R,R*-Flr** and ***Eu*<sub>2</sub>Ir<sub>2</sub>** are well described by an octahedral geometry.

\*Continuous Shape Measure (CShM) Parameters:<sup>58</sup>

six-coordinated complexes

- CShM HP-6 – the parameter related to the hexagon (*D<sub>6h</sub>* symmetry)
- CShM PPY-6 – the parameter related to the pentagonal pyramid (*C<sub>5v</sub>*)
- CShM OC-6 – the parameter related to the octahedron (*O<sub>h</sub>*)
- CShM TPR-6 – the parameter related to the trigonal prism (*D<sub>3h</sub>*)
- CShM JPPY-6 – the parameter related to the Johnson pentagonal pyramid (*C<sub>5v</sub>*)

nine-coordinated complexes<sup>59</sup>

- CShM MFF-9 – the parameter related to the Muffin (*C<sub>s</sub>*)

ten-coordinated complexes<sup>510</sup>

- CShM JSPC-10 the parameter related to the sphenocorona (*C<sub>2v</sub>*)



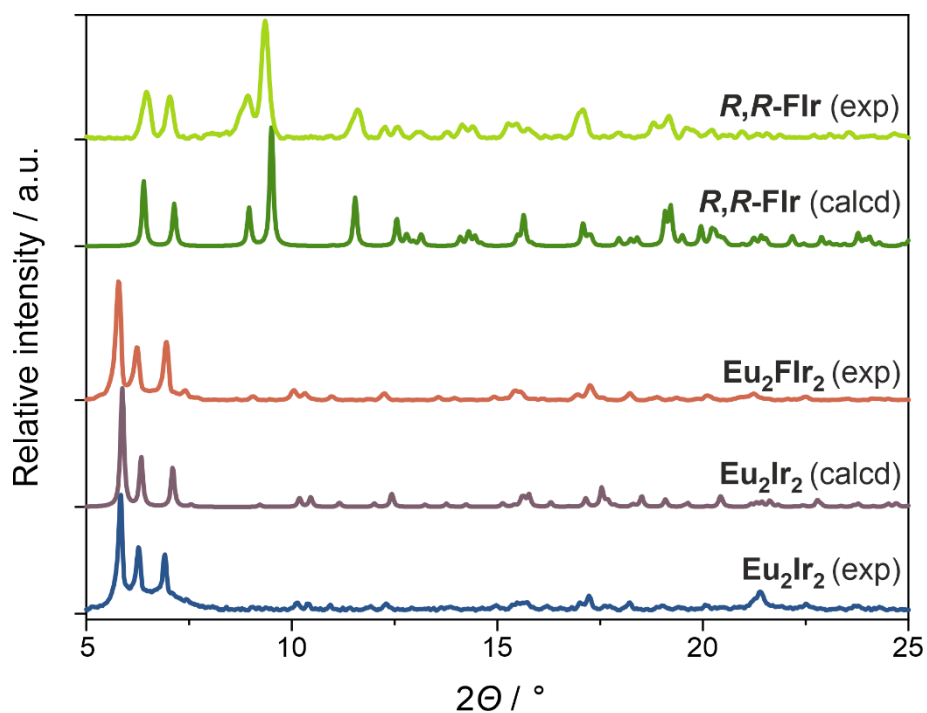

**Fig. S6** Comparison of experimental (exp) and theoretical (calcd, i.e., calculated based on the structural model obtained within the SC-XRD structural analysis) powder XRD diffractograms for reported compounds, presented in the range of 5–30° of the  $2\theta$  angle.

**Comment on Fig. S6:** The crystals of compound  $\text{Eu}_2\text{Flr}_2$  were not suitable for the reliable SC-XRD analysis. However, the P-XRD analysis of the obtained polycrystalline sample of this material reveals that it is isostructural with the  $\text{Eu}_2\text{Ir}_2$  compound for which both the SC-XRD as well as the P-XRD analyses were successfully performed.

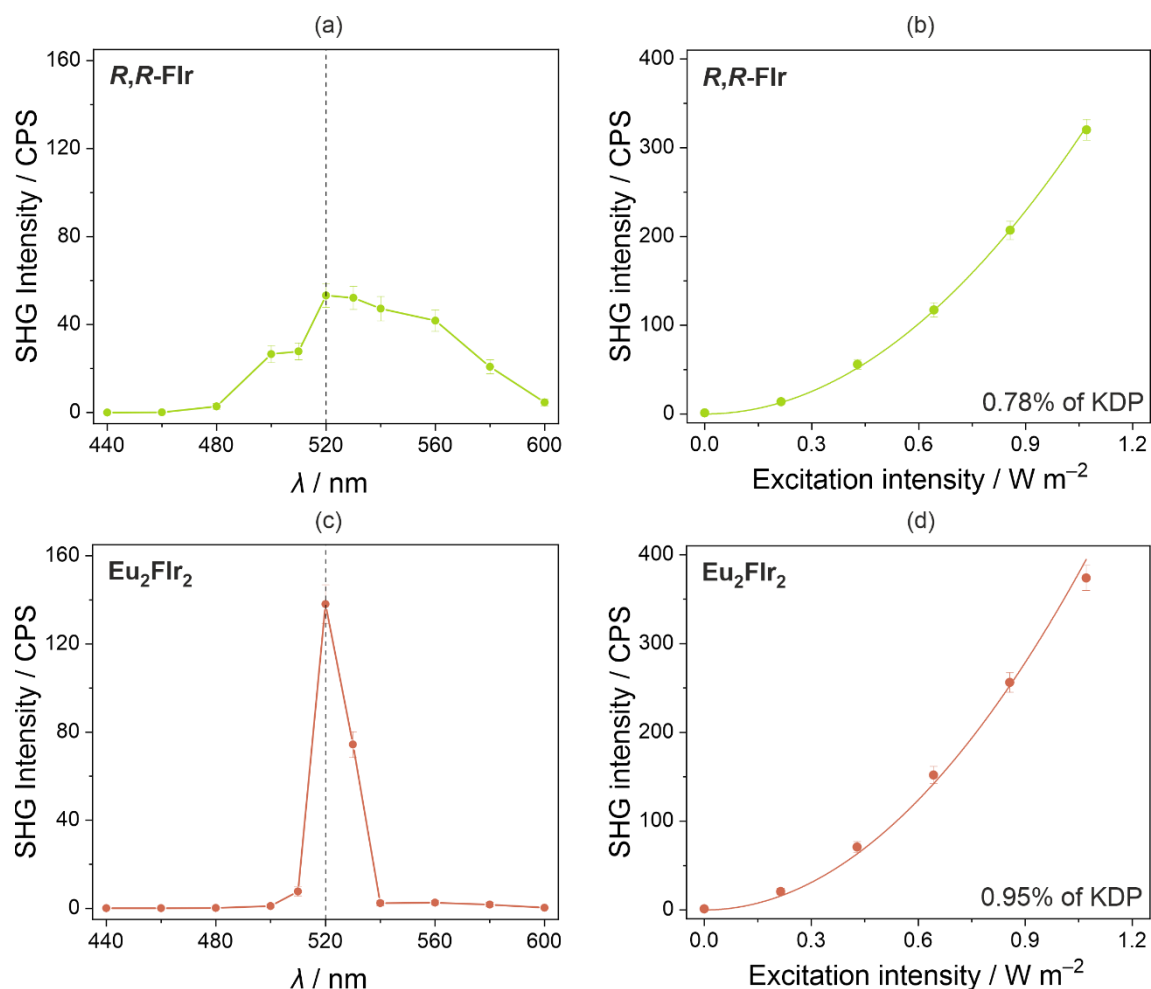

**Fig. S7** Detailed SHG characteristics for *R,R*-Flr and  $\text{Eu}_2\text{Flr}_2$  for the irradiation by the 1040 nm laser, including the wavelength dependences for the SHG output light (a and c for *R,R*-Flr and  $\text{Eu}_2\text{Flr}_2$ , respectively) and the respective power dependences for the SHG light at 520 nm (b and d). In the (b) and (d) parts, the strength of the SHG light for the depicted compound compared with that for the KDP (potassium dihydrogen phosphate) reference material is presented. Note that the wavelength dependences were gathered for the maximal accessible excitation intensity, but the observed SHG intensity was found to be weaker than for the preceded measurement of the power dependences due to the gradual degradation of the samples under the prolonged strong laser irradiation. For such a reason, the analogous data could not be reliably measured for  $\text{Eu}_2\text{Flr}_2$ , which was found to be much more sensitive to laser irradiation.



**Table S5** Comparison of the SHG intensities for the reported compounds and the previously published reference materials.<sup>S1</sup>

| Compound                                            | Formula                                                                                                                                                                                                                                      | Space group                                           | SHG intensity as a percentage of the signal for KDP |
|-----------------------------------------------------|----------------------------------------------------------------------------------------------------------------------------------------------------------------------------------------------------------------------------------------------|-------------------------------------------------------|-----------------------------------------------------|
| <b><i>R,R</i>-Flr</b><br>/this work/                | TBA[Ir <sup>III</sup> (CN) <sub>2</sub> ( <i>R,R</i> -Fpinppy) <sub>2</sub> ] $\cdot$ 2H <sub>2</sub> O                                                                                                                                      | <i>P</i> 2 <sub>1</sub> 2 <sub>1</sub> 2 <sub>1</sub> | 0.78%                                               |
| <b><i>R,R</i>-Ir</b> <sup>S1</sup>                  | TBA[Ir <sup>III</sup> (CN) <sub>2</sub> ( <i>R,R</i> -pinppy) <sub>2</sub> ] $\cdot$ 2H <sub>2</sub> O                                                                                                                                       | <i>P</i> 2 <sub>1</sub> 2 <sub>1</sub> 2 <sub>1</sub> | 0.17%                                               |
| <b>Eu<sub>2</sub>Flr<sub>2</sub></b><br>/this work/ | (TBA) <sub>2</sub> {[Eu <sup>III</sup> (NO <sub>3</sub> ) <sub>3</sub> (H <sub>2</sub> O) <sub>0.5</sub> ] <sub>2</sub> [Ir <sup>III</sup> (CN) <sub>2</sub> ( <i>R,R</i> -Fpinppy) <sub>2</sub> ] <sub>2</sub> } $\cdot$ 6H <sub>2</sub> O  | <i>P</i> 6 <sub>2</sub> 22                            | 0.96%                                               |
| <b>Eu<sub>2</sub>Ir<sub>2</sub></b><br>/this work/  | (TBA) <sub>2</sub> {[Eu <sup>III</sup> (NO <sub>3</sub> ) <sub>3</sub> (H <sub>2</sub> O) <sub>0.5</sub> ] <sub>2</sub> [Ir <sup>III</sup> (CN) <sub>2</sub> ( <i>R,R</i> -pinppy) <sub>2</sub> ] <sub>2</sub> } $\cdot$ 4H <sub>2</sub> O   | <i>P</i> 6 <sub>2</sub> 22                            | ~0% /not stable under the laser irradiation/        |
| <b>La<sub>2</sub>Ir<sub>2</sub></b> <sup>S1</sup>   | (TBA) <sub>2</sub> {[La <sup>III</sup> (NO <sub>3</sub> ) <sub>3</sub> (H <sub>2</sub> O) <sub>0.5</sub> ] <sub>2</sub> [Ir <sup>III</sup> (CN) <sub>2</sub> ( <i>R,R</i> -pinppy) <sub>2</sub> ] <sub>2</sub> } $\cdot$ 4.5H <sub>2</sub> O | <i>P</i> 6 <sub>2</sub> 22                            | 0.045 %                                             |

**Comment on Table S5:** According to the Kleinman symmetry rule,<sup>S11,S12</sup> the 422, 432, and 622 point groups should not exhibit second harmonic generation. However, according to the literature,<sup>S13–S15</sup> this principle was shown to be often violated in non-ideal media, i.e., dispersive ones, such as in the powder samples of molecular materials. This explains why the non-zero SHG values can be obtained in the **Eu<sub>2</sub>Flr<sub>2</sub>** material, and were observed in the analogous La(III)-containing compound, **La<sub>2</sub>Ir<sub>2</sub>**.<sup>S1</sup>

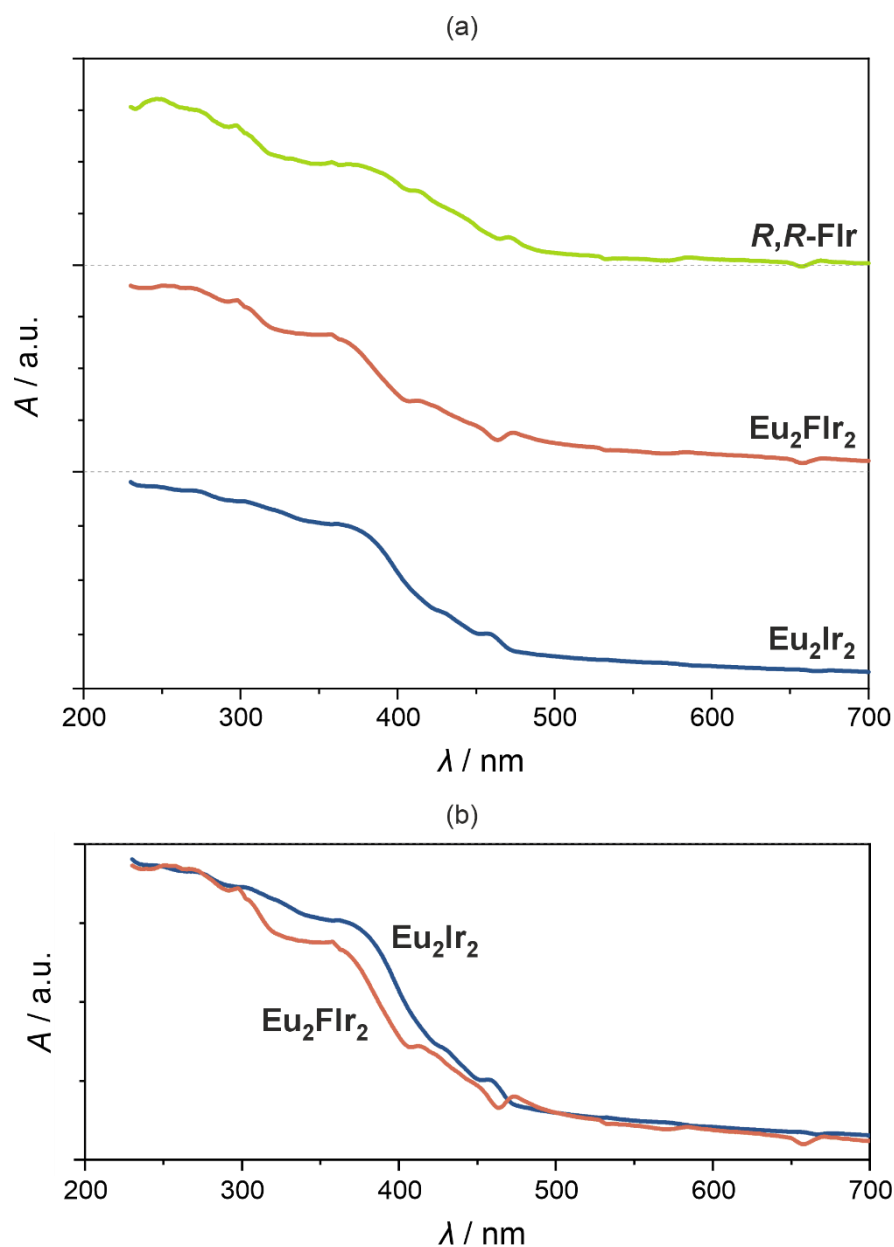

**Fig. S8** Solid-state UV-Vis absorption spectra of reported compounds, recorded at room temperature (300K) in the 230–700 nm wavelength range (a), and the additional presentation of the overlapped normalized spectra for two heterometallic compounds, illustrating the blueshift of the absorption bands occurring when going from  $\text{Eu}_2\text{Ir}_2$  to its fluorinated analogue of  $\text{Eu}_2\text{Flr}_2$  (b, see the main text for details).

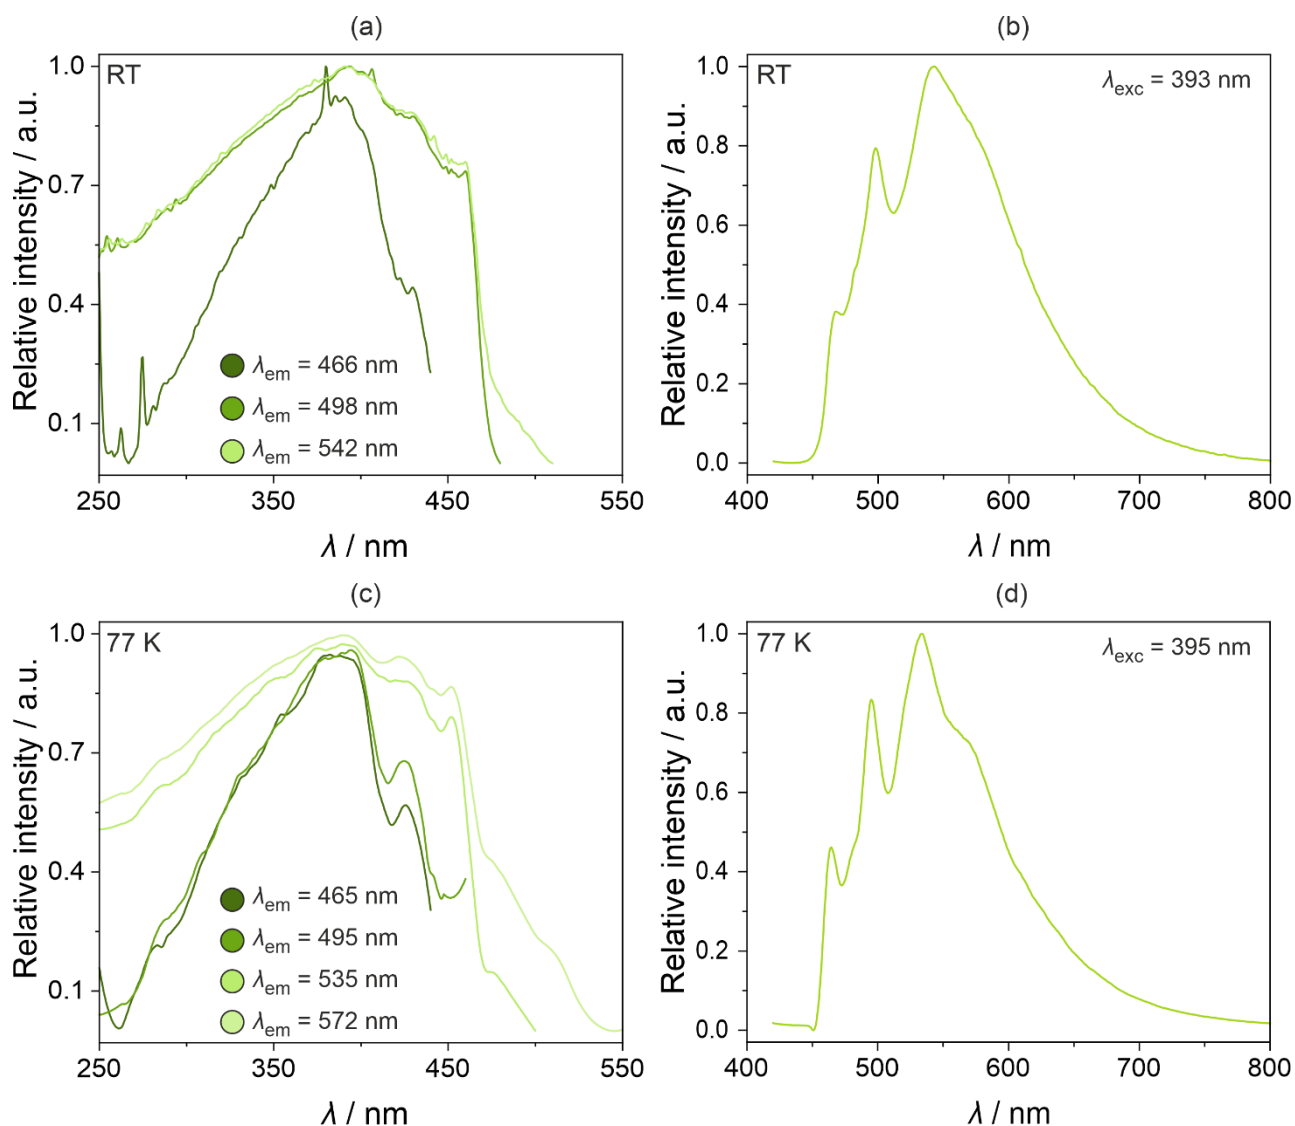

**Fig. S9** Representative solid-state photoluminescent characteristics of *R,R*-Flr, including room-temperature (RT) excitation spectra for the indicated emission maxima (a), the room-temperature emission spectrum for the optimal indicated excitation (b), low-temperature (77 K) excitation spectra for the indicated emission maxima (c), and the low-temperature (77 K) emission spectrum for the optimal indicated excitation (d).

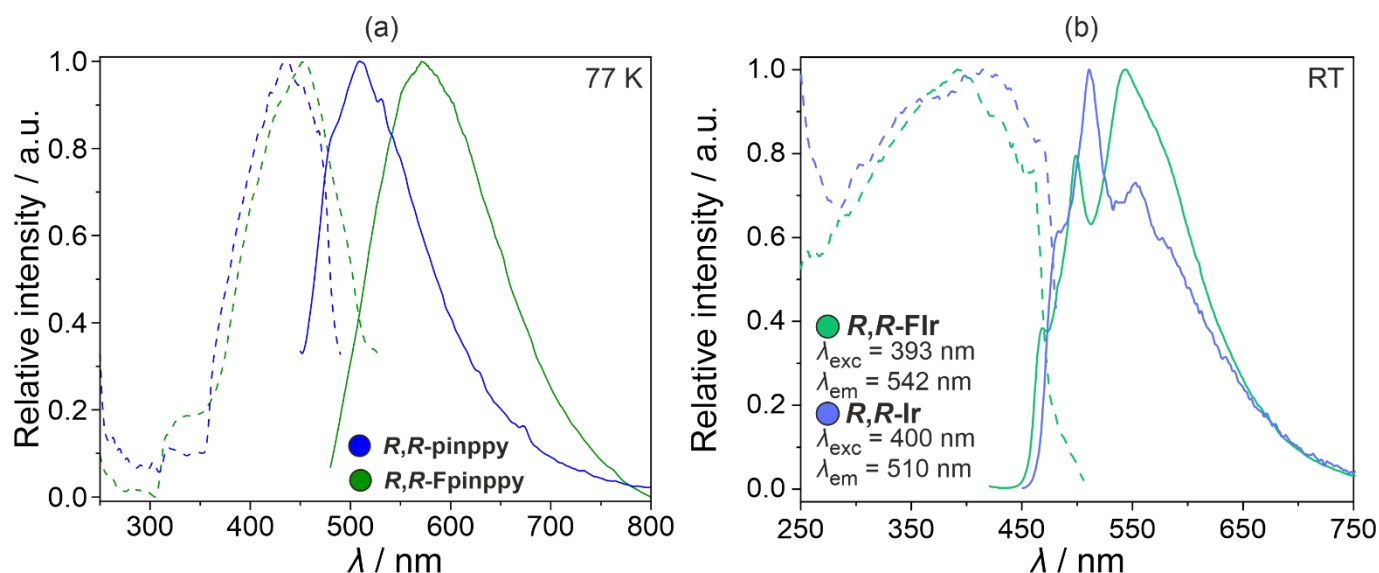

**Fig. S10** Comparison of solid-state photoluminescence properties of used organic ligands of *R,R*-FpinppyH and *R,R*-pinppyH<sup>S1</sup> (a, measured in their free forms, without metal ions), as well as the analogous properties of *R,R*-Flr and *R,R*-Ir<sup>S1</sup> (b). Each comparison contains the excitation spectra for the monitored emission maximum and the respective emission spectra for the optimal excitation. As the bands are much more complex for *R,R*-Flr and *R,R*-Ir, the detailed wavelength values used are depicted on the graph for their cases. The spectra for the ligands were gathered at a decreased temperature (77 K) as they are not luminescent at room temperature.

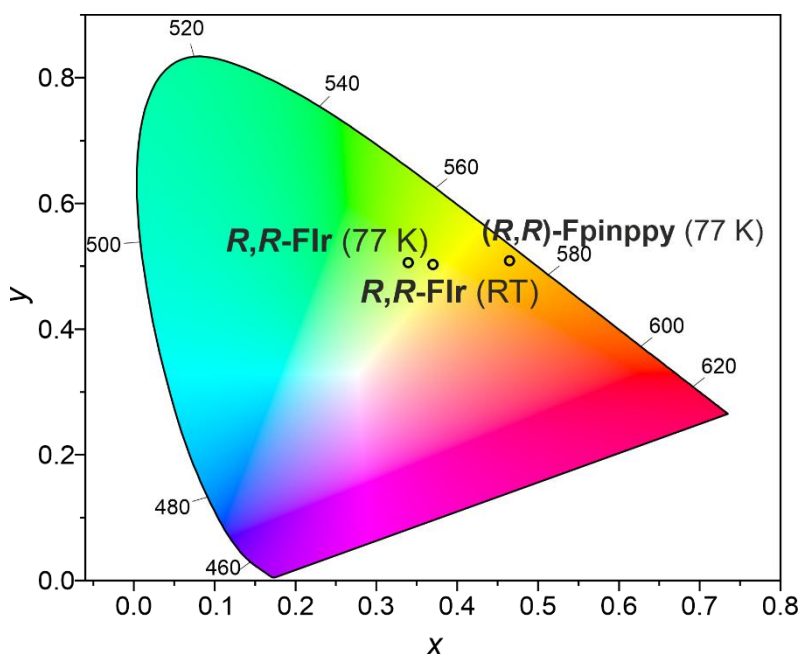

**Fig. S11** The emission color of ***R,R*-FpinppyH** (77 K) and ***R,R*-Flr** (77 K and RT) presented on the CIE 1931 chromaticity diagram. Corresponding *x* and *y* parameters were gathered in Table S6.

**Table S6** The CIE 1931 chromaticity parameters for the solid-state emission of *R,R*-FpinppyH and ***R,R*-Flr**.

| Compound              | Temperature | CIE 1931 chromaticity parameters |          |
|-----------------------|-------------|----------------------------------|----------|
|                       |             | <i>x</i>                         | <i>y</i> |
| <i>R,R</i> -FpinppyH  | 77 K        | 0.465                            | 0.509    |
| <b><i>R,R</i>-Flr</b> | RT          | 0.340                            | 0.506    |
| <b><i>R,R</i>-Flr</b> | 77 K        | 0.370                            | 0.503    |

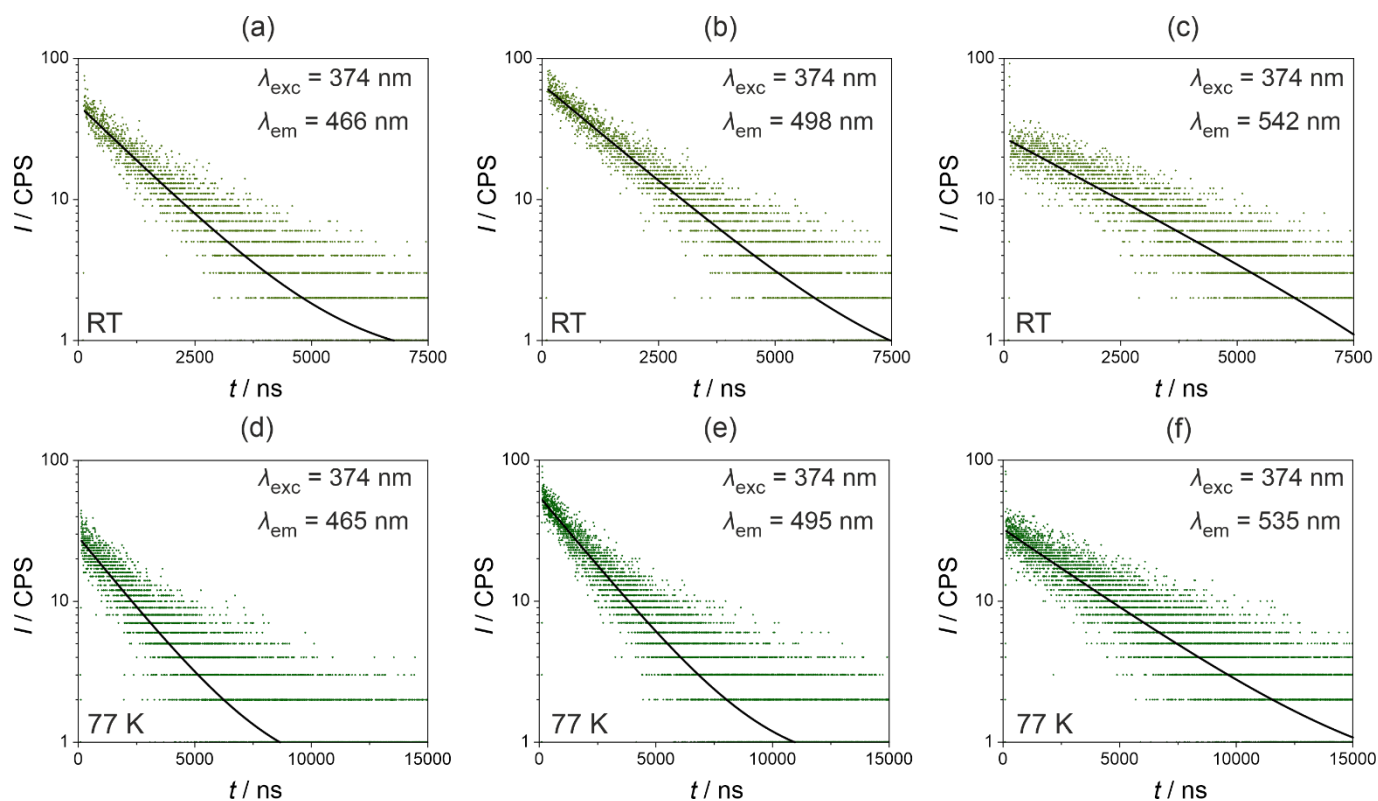

**Fig. S12** The set of emission lifetimes gathered for ***R,R*-Flr** at room temperature under three different emission maxima (a–c) and low temperature (77 K) under three different emission maxima (d–f). In both cases, the selected emission wavelengths correspond to the distinct maxima detectable on the respective emission pattern (see Fig. S9). The dots represent data gathered to which the exponential decay functions were fitted (solid black lines). The resulting best-fit parameters are presented in Table S7.

**Table S7** Best-fit parameters for the emission decay profiles for ***R,R*-Flr** to the mono-exponential decay function for data gathered for different emission bands at room temperature and 77 K under the 374 nm picosecond laser diode irradiation.

| RT                      |                               |          | 77 K                    |                               |          |
|-------------------------|-------------------------------|----------|-------------------------|-------------------------------|----------|
| Emission wavelength /nm | $\tau(\pm\tau) / \mu\text{s}$ | $\chi^2$ | Emission wavelength /nm | $\tau(\pm\tau) / \mu\text{s}$ | $\chi^2$ |
| 466                     | 1.353( $\pm 0.018$ )          | 1.0006   | 465                     | 2.117( $\pm 0.032$ )          | 1.0387   |
| 498                     | 1.567( $\pm 0.016$ )          | 1.0053   | 495                     | 2.174( $\pm 0.018$ )          | 1.0123   |
| 542                     | 2.491( $\pm 0.041$ )          | 1.0077   | 535                     | 3.812( $\pm 0.038$ )          | 1.0440   |

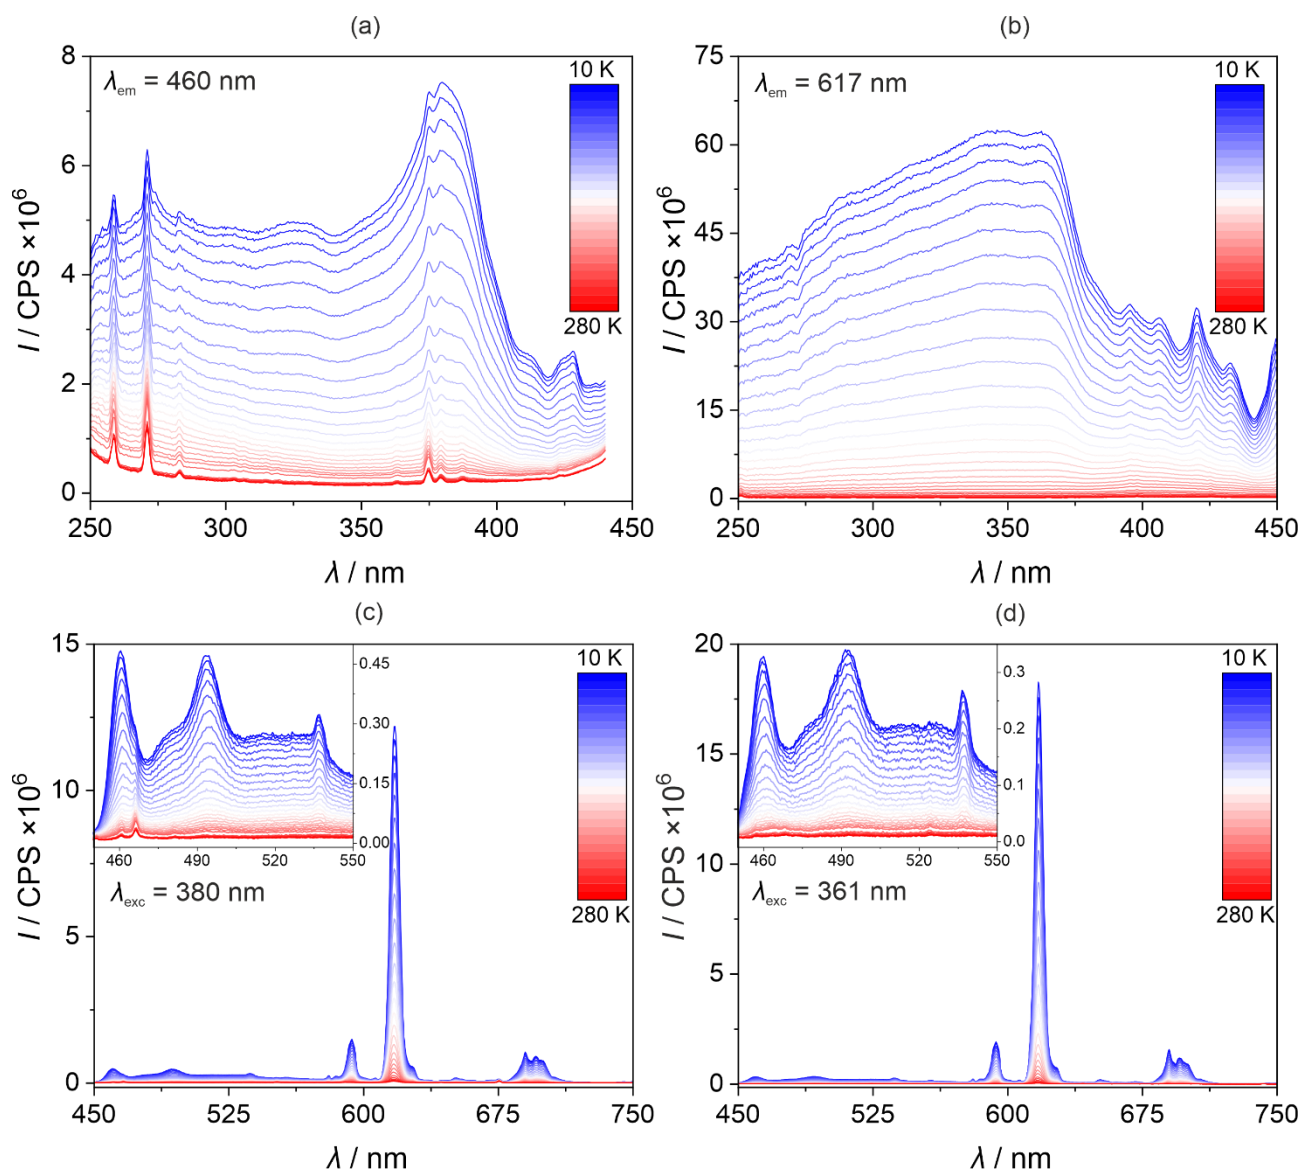

**Fig. S13** Temperature-variable photoluminescent characteristics of  $\text{Eu}_2\text{FIr}_2$ , including the excitation spectra for the monitored emission at 460 nm (a), the excitation spectra for the monitored emission at 617 nm (b), the emission spectra under the 380 nm excitation (c), and the emission spectra under the 361 nm excitation (d). In (c) and (d), the inset contains the enlargement of the spectra for the limited wavelength range of 450–550 nm, corresponding to the emission of Ir(III) complexes.



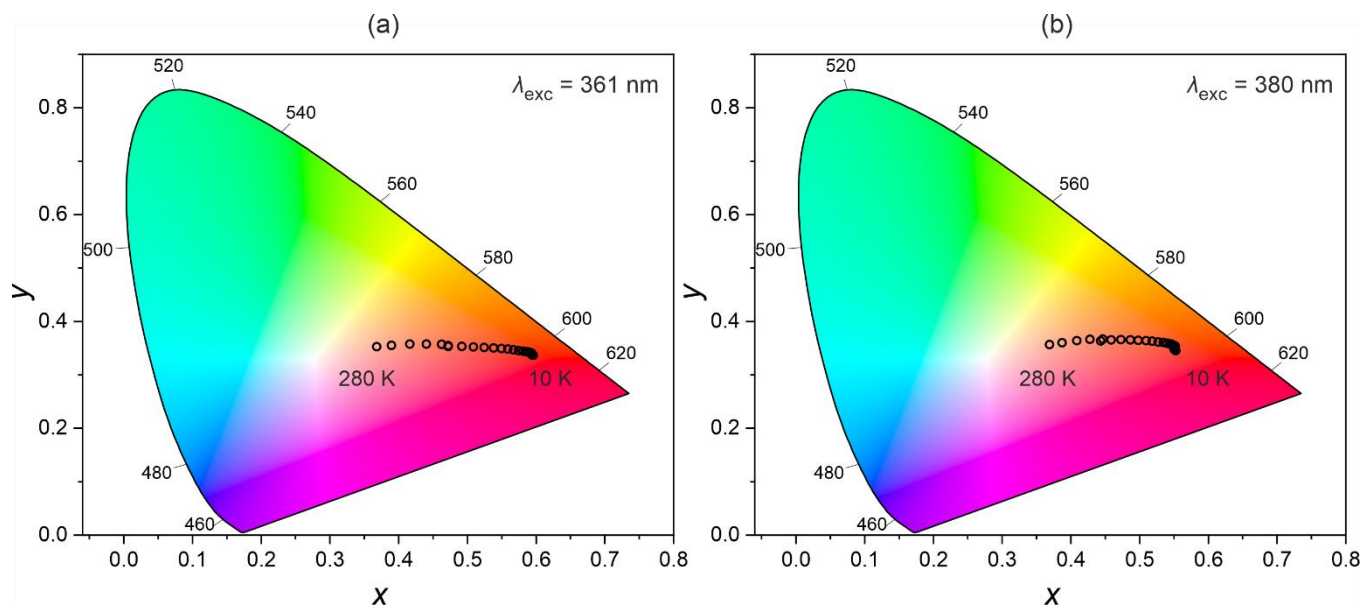

**Fig. S14** The emission colors of **Eu<sub>2</sub>Flr<sub>2</sub>**, presented on the CIE 1931 chromaticity diagram, representing the temperature dependences of the emission under the 361 nm (a) and 380 nm (b) excitation. Corresponding *x* and *y* parameters were gathered in Table S8.

**Table S8** The CIE 1931 chromaticity parameters of temperature-variable emission of **Eu<sub>2</sub>Flr<sub>2</sub>** for two indicated excitation wavelengths.

| Temperature / K | CIE 1931 chromaticity parameters        |          |                                         |          |
|-----------------|-----------------------------------------|----------|-----------------------------------------|----------|
|                 | $\lambda_{\text{exc}} = 361 \text{ nm}$ |          | $\lambda_{\text{exc}} = 380 \text{ nm}$ |          |
|                 | <i>x</i>                                | <i>y</i> | <i>x</i>                                | <i>y</i> |
| 10              | 0.596                                   | 0.336    | 0.553                                   | 0.345    |
| 20              | 0.595                                   | 0.337    | 0.552                                   | 0.346    |
| 30              | 0.594                                   | 0.338    | 0.551                                   | 0.348    |
| 40              | 0.594                                   | 0.338    | 0.550                                   | 0.349    |
| 50              | 0.594                                   | 0.339    | 0.550                                   | 0.350    |
| 60              | 0.594                                   | 0.340    | 0.550                                   | 0.351    |
| 70              | 0.594                                   | 0.340    | 0.552                                   | 0.352    |
| 80              | 0.594                                   | 0.340    | 0.552                                   | 0.353    |
| 90              | 0.593                                   | 0.341    | 0.551                                   | 0.354    |
| 100             | 0.591                                   | 0.342    | 0.550                                   | 0.355    |
| 110             | 0.588                                   | 0.343    | 0.549                                   | 0.356    |
| 120             | 0.585                                   | 0.343    | 0.547                                   | 0.357    |
| 130             | 0.581                                   | 0.344    | 0.544                                   | 0.358    |
| 140             | 0.575                                   | 0.345    | 0.540                                   | 0.359    |
| 150             | 0.567                                   | 0.347    | 0.534                                   | 0.360    |
| 160             | 0.559                                   | 0.348    | 0.527                                   | 0.361    |
| 170             | 0.550                                   | 0.349    | 0.519                                   | 0.363    |
| 180             | 0.538                                   | 0.350    | 0.510                                   | 0.364    |
| 190             | 0.524                                   | 0.351    | 0.498                                   | 0.364    |
| 200             | 0.509                                   | 0.352    | 0.487                                   | 0.365    |
| 210             | 0.492                                   | 0.353    | 0.473                                   | 0.366    |
| 220             | 0.472                                   | 0.353    | 0.459                                   | 0.365    |
| 230             | 0.472                                   | 0.355    | 0.444                                   | 0.363    |
| 240             | 0.462                                   | 0.357    | 0.446                                   | 0.367    |
| 250             | 0.440                                   | 0.358    | 0.428                                   | 0.366    |
| 260             | 0.416                                   | 0.357    | 0.409                                   | 0.364    |
| 270             | 0.390                                   | 0.355    | 0.387                                   | 0.360    |
| 280             | 0.368                                   | 0.352    | 0.369                                   | 0.356    |

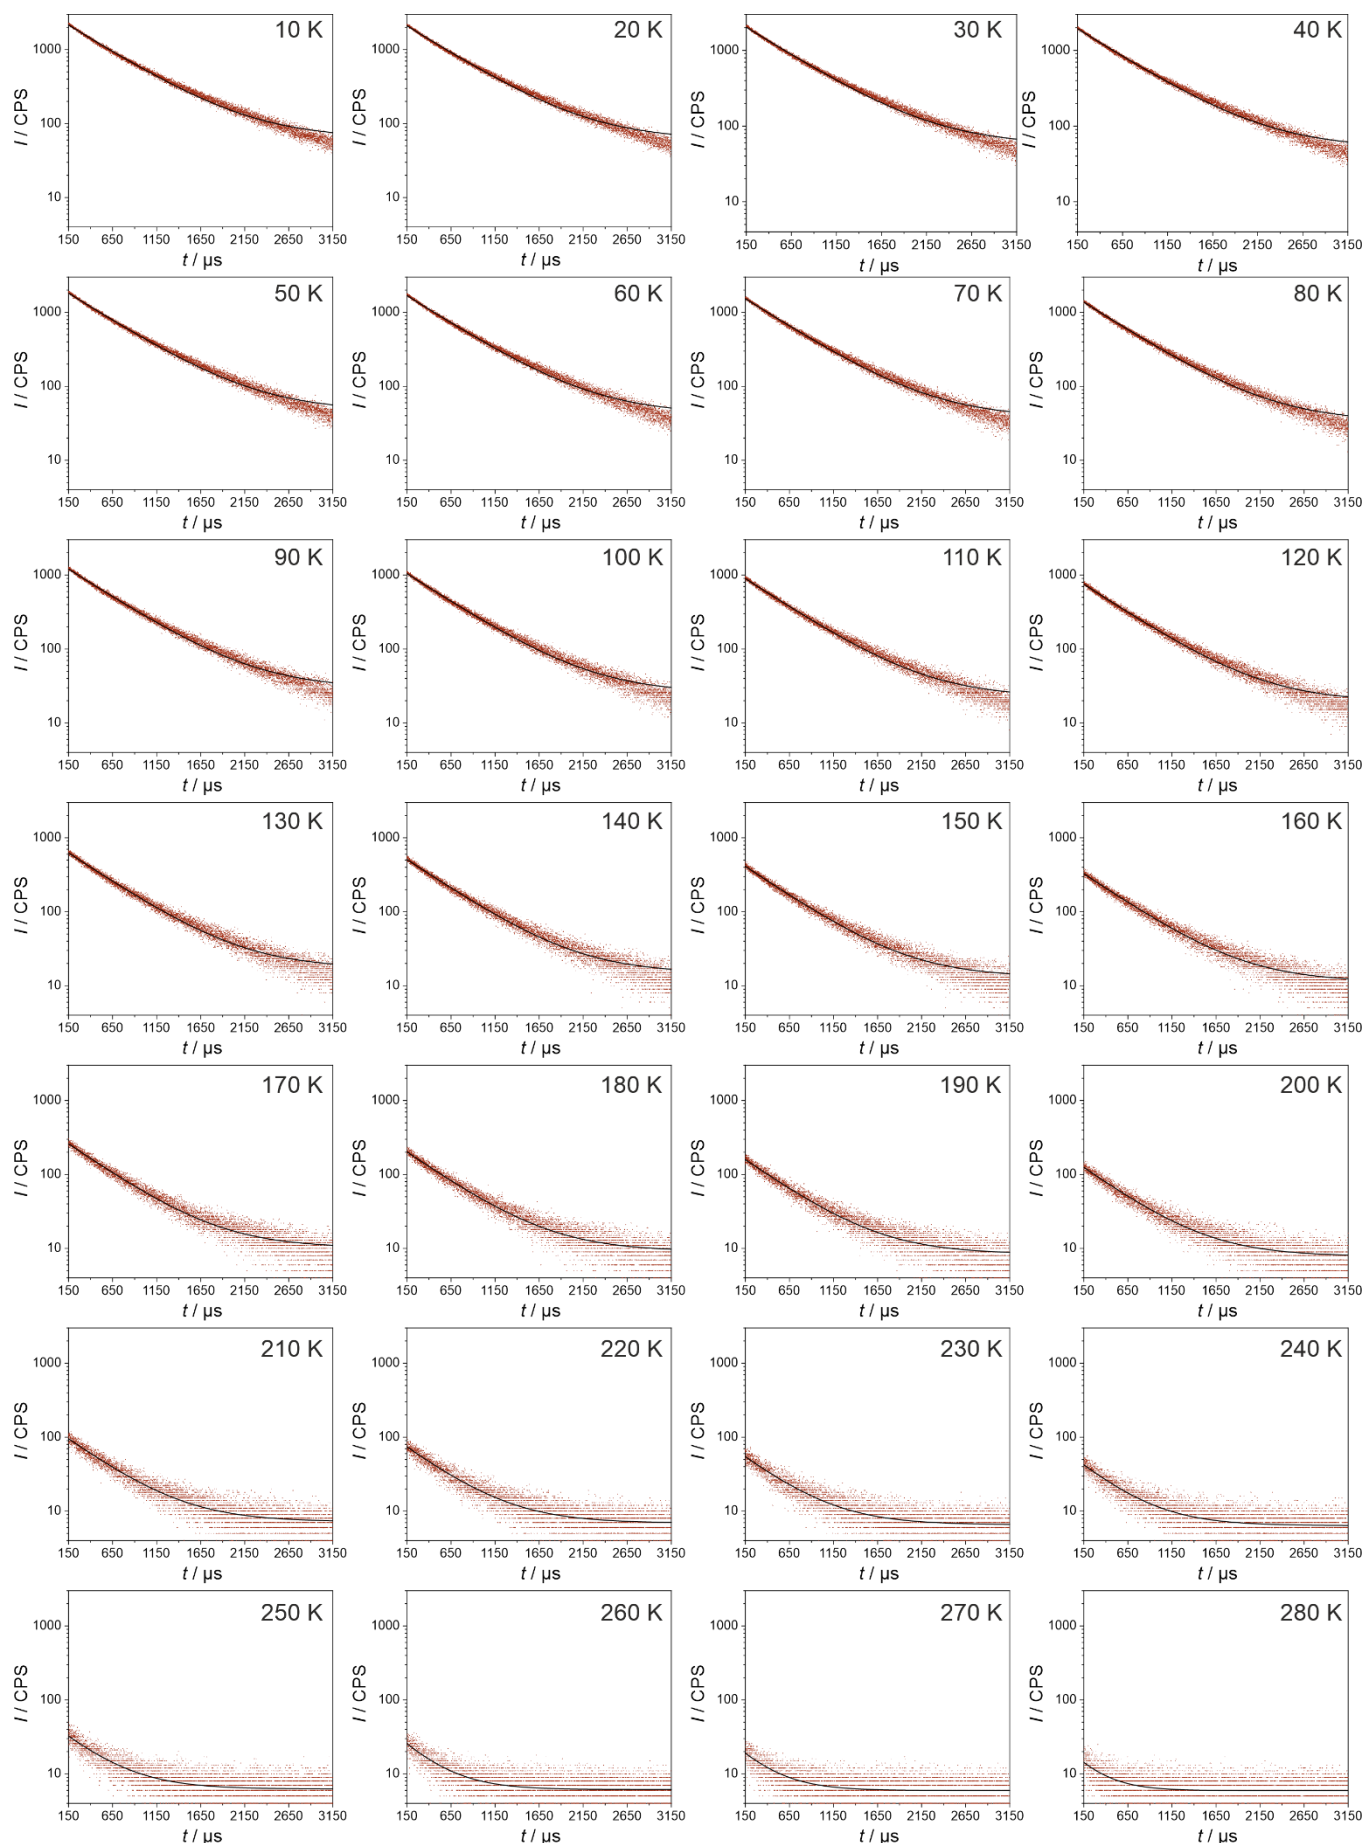

**Fig. S15** Emission decay profiles for  $\text{Eu}_2\text{Flr}_2$  under the 361 nm excitation and the monitored 617 nm emission at variable indicated temperatures. Dots represent experimental data while solid lines show the best fits to the mono-exponential decay function (see Table S9 and the related comment).

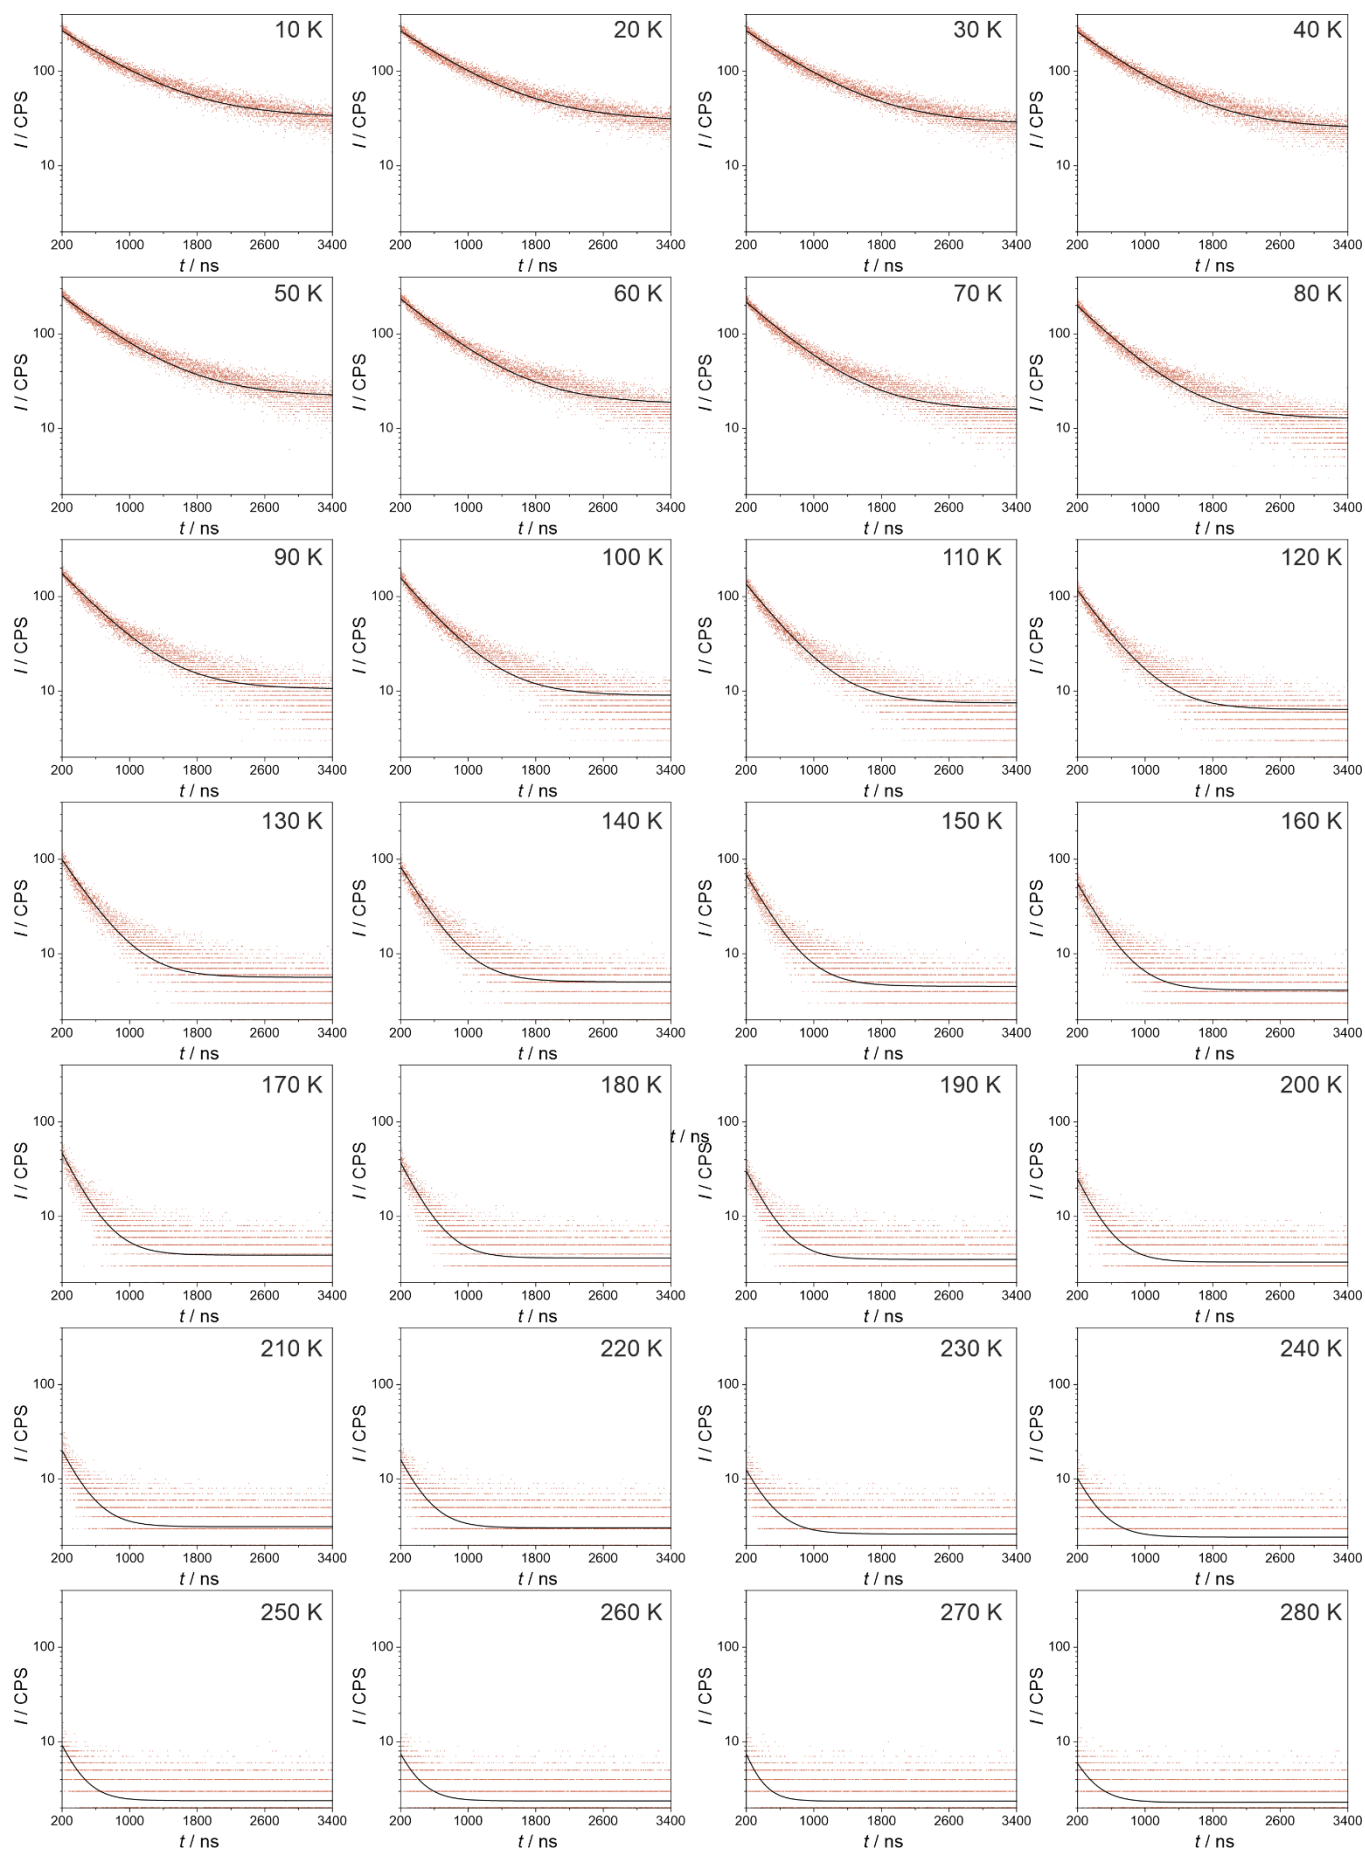

**Fig. S16** Emission decay profiles for  $\text{Eu}_2\text{Flr}_2$  under the 374 nm excitation and the monitored 460 nm emission at variable indicated temperatures. Dots represent experimental data while solid lines show the best fits to the mono-exponential decay function (see Table S10 and the related comment).

**Table S9** The best-fit parameters for emission decay profiles of **Eu<sub>2</sub>Flr<sub>2</sub>** for the emission at 617 nm under the excitation at 361 nm (see Fig. S15 and the comment below).

| Temperature / K | $\tau(\pm\tau)$ / $\mu$ s | $\chi^2$ | Temperature / K | $\tau(\pm\tau)$ / $\mu$ s | $\chi^2$ |
|-----------------|---------------------------|----------|-----------------|---------------------------|----------|
| 10              | 582.140( $\pm$ 0.919)     | 0.999    | 150             | 533.384( $\pm$ 1.510)     | 0.999    |
| 20              | 578.439( $\pm$ 0.899)     | 0.999    | 160             | 534.248( $\pm$ 1.709)     | 0.999    |
| 30              | 578.541( $\pm$ 0.927)     | 0.999    | 170             | 523.089( $\pm$ 1.916)     | 0.999    |
| 40              | 576.748( $\pm$ 0.910)     | 0.999    | 180             | 520.116( $\pm$ 2.135)     | 0.999    |
| 50              | 576.375( $\pm$ 0.920)     | 0.999    | 190             | 512.613( $\pm$ 2.409)     | 0.999    |
| 60              | 571.334( $\pm$ 0.924)     | 0.999    | 200             | 500.287( $\pm$ 2.621)     | 0.999    |
| 70              | 570.439( $\pm$ 0.951)     | 0.999    | 210             | 496.662( $\pm$ 3.132)     | 0.999    |
| 80              | 568.400( $\pm$ 0.985)     | 0.999    | 220             | 482.006( $\pm$ 3.606)     | 0.999    |
| 90              | 564.109( $\pm$ 1.001)     | 0.999    | 230             | 465.123( $\pm$ 4.416)     | 0.999    |
| 100             | 561.170( $\pm$ 1.058)     | 0.999    | 240             | 430.070( $\pm$ 4.853)     | 0.999    |
| 110             | 554.819( $\pm$ 1.114)     | 0.999    | 250             | 423.200( $\pm$ 6.205)     | 0.999    |
| 120             | 552.894( $\pm$ 1.195)     | 0.999    | 260             | 357.340( $\pm$ 6.628)     | 0.999    |
| 130             | 544.373( $\pm$ 1.305)     | 0.999    | 270             | 337.652( $\pm$ 8.863)     | 0.999    |
| 140             | 541.127( $\pm$ 1.408)     | 0.999    | 280             | 285.709( $\pm$ 11.877)    | 0.999    |

**Table S10** The best-fit parameters for emission decay profiles of **Eu<sub>2</sub>Flr<sub>2</sub>** for the emission at 460 nm under the excitation at 374 nm (see Fig. S16 and the comment below).

| Temperature / K | $\tau(\pm\tau)$ / ns  | $\chi^2$ | Temperature / K | $\tau(\pm\tau)$ / ns   | $\chi^2$ |
|-----------------|-----------------------|----------|-----------------|------------------------|----------|
| 10              | 668.977( $\pm$ 3.343) | 0.999    | 150             | 270.489( $\pm$ 1.969)  | 0.999    |
| 20              | 670.470( $\pm$ 3.203) | 0.999    | 160             | 261.789( $\pm$ 2.226)  | 0.999    |
| 30              | 651.779( $\pm$ 3.006) | 0.999    | 170             | 236.886( $\pm$ 2.222)  | 0.999    |
| 40              | 629.741( $\pm$ 2.878) | 0.999    | 180             | 231.620( $\pm$ 2.574)  | 0.999    |
| 50              | 592.487( $\pm$ 2.679) | 0.999    | 190             | 226.177( $\pm$ 2.918)  | 0.999    |
| 60              | 565.758( $\pm$ 2.554) | 0.999    | 200             | 218.366( $\pm$ 3.363)  | 0.999    |
| 70              | 529.262( $\pm$ 2.423) | 0.999    | 210             | 220.906( $\pm$ 4.080)  | 0.999    |
| 80              | 491.804( $\pm$ 2.223) | 0.999    | 220             | 216.022( $\pm$ 4.910)  | 0.999    |
| 90              | 454.981( $\pm$ 2.120) | 0.999    | 230             | 222.297( $\pm$ 5.999)  | 0.999    |
| 100             | 410.043( $\pm$ 1.984) | 0.999    | 240             | 212.199( $\pm$ 7.082)  | 0.999    |
| 110             | 378.795( $\pm$ 1.966) | 0.999    | 250             | 188.024( $\pm$ 7.092)  | 0.999    |
| 120             | 345.113( $\pm$ 1.901) | 0.999    | 260             | 188.443( $\pm$ 9.319)  | 0.999    |
| 130             | 315.884( $\pm$ 1.904) | 0.999    | 270             | 148.560( $\pm$ 8.058)  | 0.999    |
| 140             | 288.284( $\pm$ 1.899) | 0.999    | 280             | 198.891( $\pm$ 13.077) | 0.999    |

**Comment on the determination of emission lifetimes in Eu<sub>2</sub>Flr<sub>2</sub> (Tables S9 and S10) and Eu<sub>2</sub>Ir<sub>2</sub> (Tables S12 and S13):**

Fitting of the mono-exponential decay function was performed in the Origin software. The fitting function was as follows:

$$I = I_0 + Ae^{\frac{-t}{\tau}}$$

where:

$I$  – intensity,  $I_0$  – intensity offset (background),  $A$  – constant,  $t$  – time,  $\tau$  – luminescence lifetime.

Application of the term connected with the background allowed all data to be fitted in the same range of time, and allowed for obtaining good fitting parameters.

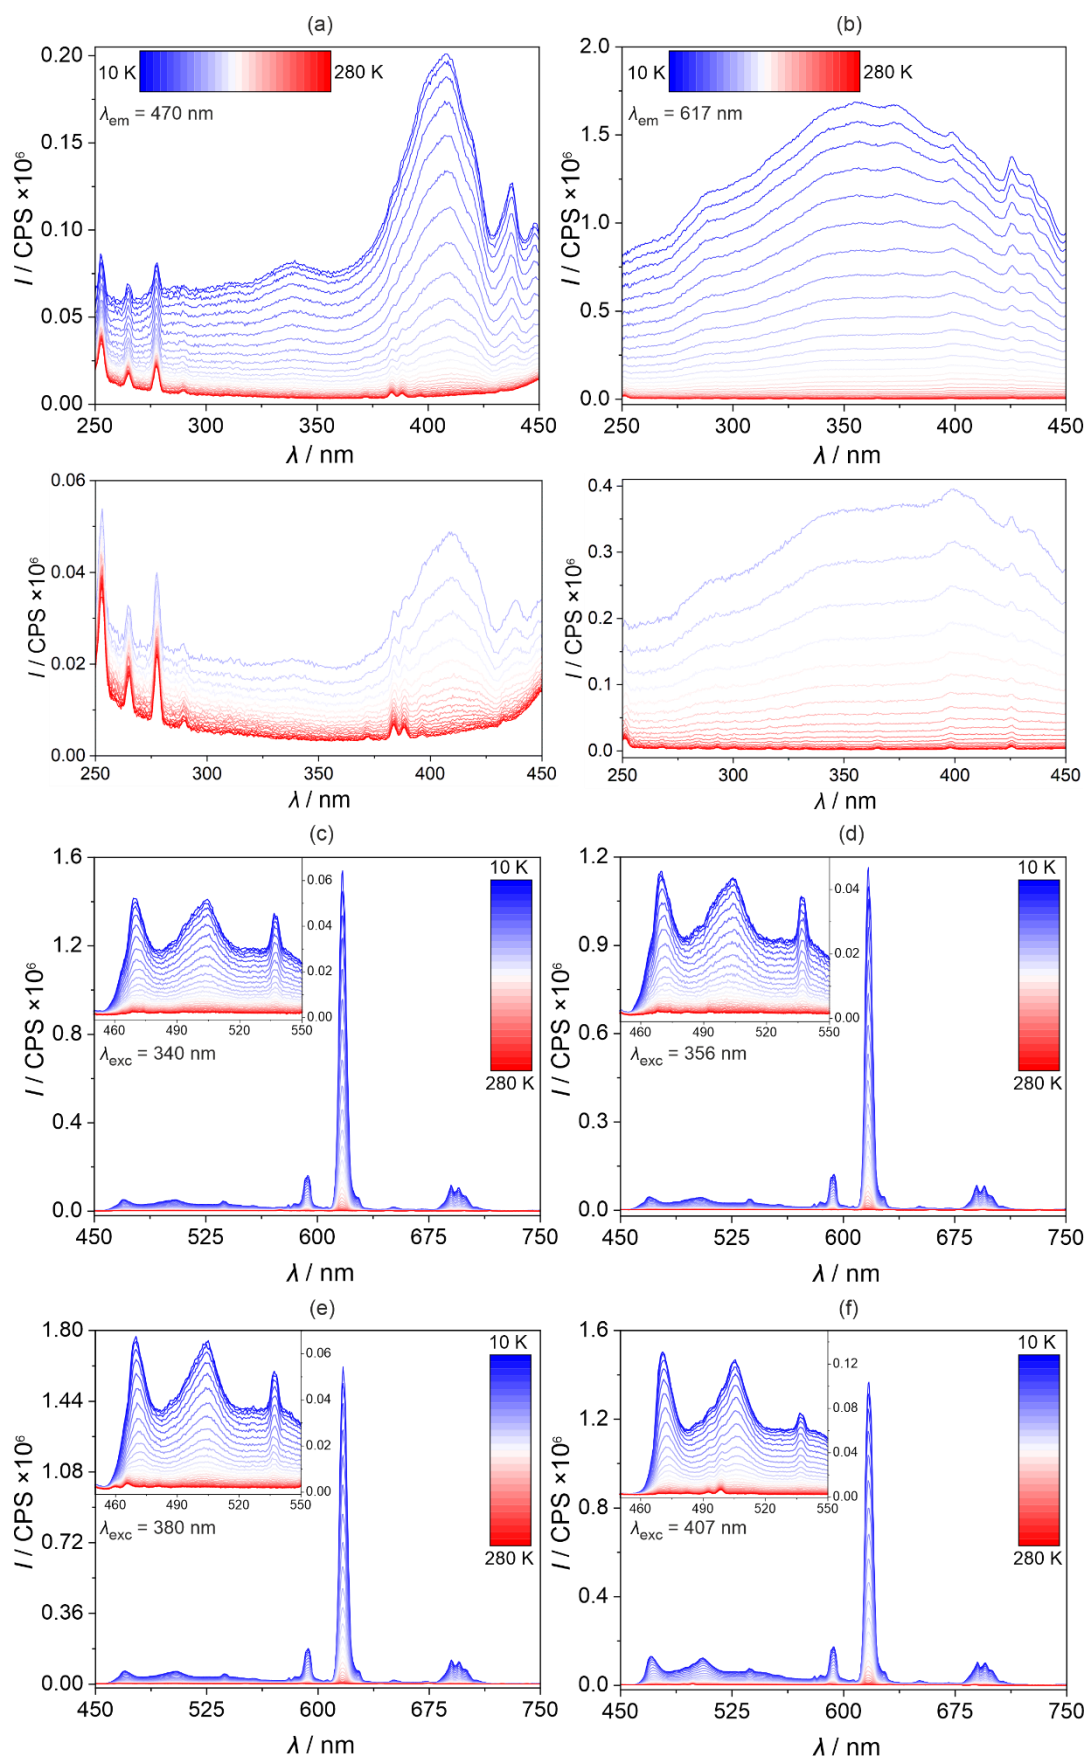

**Fig. S17** Temperature-variable photoluminescent characteristics of  $\text{Eu}_2\text{Ir}_2$ , including the excitation spectra for the monitored emission at 470 nm (a, the bottom part shows the limited 120–280 K range), the excitation spectra for the monitored emission at 617 nm (b, the bottom part shows the limited 120–280 K range), the emission spectra under the 340 nm excitation (c), the emission spectra under the 356 nm excitation (d), the emission spectra under the 380 nm excitation (e), and the emission spectra under the 407 nm excitation (f). In (c), (d), (e), and (f), the inset contains the enlargement of the spectra for the limited wavelength range of 450–550 nm, corresponding to the emission of Ir(III) complexes.



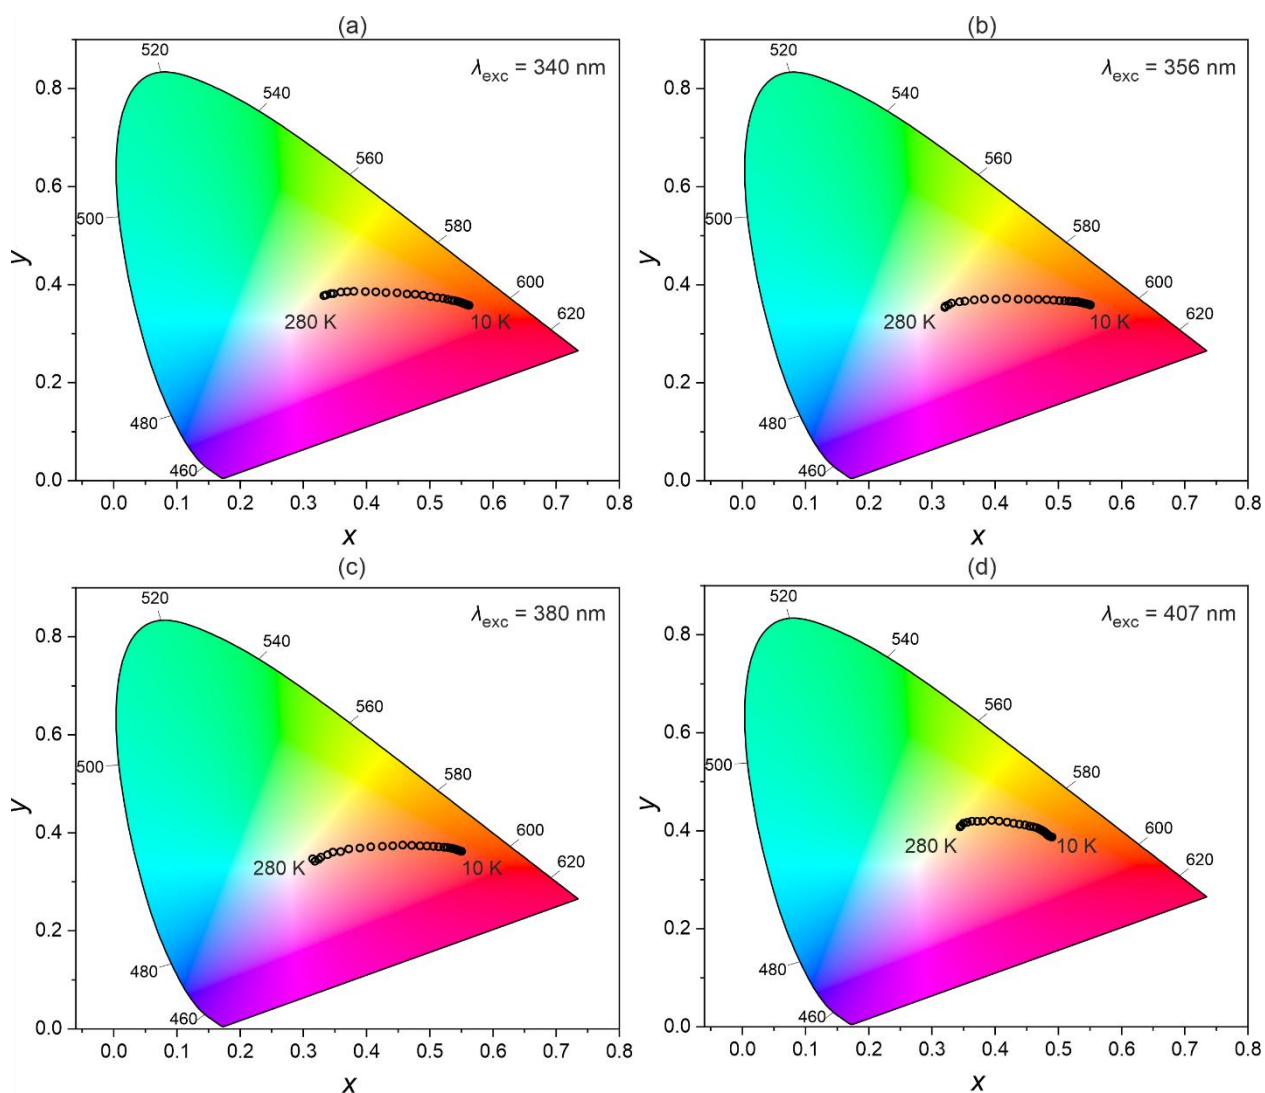

**Fig. S18** The emission colors of  $\text{Eu}_2\text{Ir}_2$ , presented on the CIE 1931 chromaticity diagram, representing the temperature dependences of the emission under the 340 nm (a), 356 nm (b), 380 nm (c), and 407 nm (d) excitation. Corresponding  $x$  and  $y$  parameters were gathered in Table S11.

**Table S11** The CIE 1931 chromaticity parameters of temperature-variable emission of  $\text{Eu}_2\text{Ir}_2$  for four indicated excitation wavelengths.

| Temperature / K | CIE 1931 chromaticity parameters        |          |                                         |          |                                         |          |                                         |          |
|-----------------|-----------------------------------------|----------|-----------------------------------------|----------|-----------------------------------------|----------|-----------------------------------------|----------|
|                 | $\lambda_{\text{exc}} = 340 \text{ nm}$ |          | $\lambda_{\text{exc}} = 356 \text{ nm}$ |          | $\lambda_{\text{exc}} = 380 \text{ nm}$ |          | $\lambda_{\text{exc}} = 407 \text{ nm}$ |          |
|                 | <i>x</i>                                | <i>y</i> | <i>x</i>                                | <i>y</i> | <i>x</i>                                | <i>y</i> | <i>x</i>                                | <i>y</i> |
| 10              | 0.563                                   | 0.358    | 0.551                                   | 0.359    | 0.315                                   | 0.347    | 0.490                                   | 0.387    |
| 20              | 0.560                                   | 0.359    | 0.548                                   | 0.360    | 0.551                                   | 0.362    | 0.487                                   | 0.388    |
| 30              | 0.557                                   | 0.360    | 0.546                                   | 0.361    | 0.549                                   | 0.363    | 0.485                                   | 0.389    |
| 40              | 0.555                                   | 0.361    | 0.543                                   | 0.362    | 0.546                                   | 0.364    | 0.484                                   | 0.390    |
| 50              | 0.553                                   | 0.362    | 0.539                                   | 0.363    | 0.544                                   | 0.365    | 0.483                                   | 0.392    |
| 60              | 0.550                                   | 0.363    | 0.536                                   | 0.364    | 0.542                                   | 0.366    | 0.482                                   | 0.393    |
| 70              | 0.547                                   | 0.365    | 0.533                                   | 0.364    | 0.540                                   | 0.367    | 0.480                                   | 0.395    |
| 80              | 0.544                                   | 0.366    | 0.530                                   | 0.365    | 0.536                                   | 0.368    | 0.479                                   | 0.396    |
| 90              | 0.539                                   | 0.367    | 0.526                                   | 0.365    | 0.533                                   | 0.369    | 0.478                                   | 0.398    |
| 100             | 0.535                                   | 0.368    | 0.522                                   | 0.366    | 0.528                                   | 0.370    | 0.476                                   | 0.399    |
| 110             | 0.528                                   | 0.370    | 0.517                                   | 0.366    | 0.523                                   | 0.370    | 0.473                                   | 0.401    |
| 120             | 0.521                                   | 0.372    | 0.510                                   | 0.367    | 0.514                                   | 0.371    | 0.470                                   | 0.404    |
| 130             | 0.512                                   | 0.373    | 0.502                                   | 0.367    | 0.506                                   | 0.372    | 0.466                                   | 0.406    |
| 140             | 0.501                                   | 0.375    | 0.493                                   | 0.368    | 0.496                                   | 0.373    | 0.461                                   | 0.408    |
| 150             | 0.490                                   | 0.378    | 0.482                                   | 0.369    | 0.485                                   | 0.373    | 0.455                                   | 0.409    |
| 160             | 0.477                                   | 0.380    | 0.468                                   | 0.370    | 0.472                                   | 0.374    | 0.447                                   | 0.412    |
| 170             | 0.464                                   | 0.381    | 0.453                                   | 0.370    | 0.457                                   | 0.375    | 0.439                                   | 0.413    |
| 180             | 0.448                                   | 0.383    | 0.437                                   | 0.370    | 0.441                                   | 0.373    | 0.429                                   | 0.415    |
| 190             | 0.431                                   | 0.384    | 0.418                                   | 0.372    | 0.425                                   | 0.372    | 0.419                                   | 0.417    |
| 200             | 0.415                                   | 0.385    | 0.401                                   | 0.370    | 0.407                                   | 0.371    | 0.406                                   | 0.419    |
| 210             | 0.398                                   | 0.385    | 0.383                                   | 0.371    | 0.390                                   | 0.369    | 0.395                                   | 0.421    |
| 220             | 0.380                                   | 0.386    | 0.367                                   | 0.369    | 0.372                                   | 0.367    | 0.381                                   | 0.420    |
| 230             | 0.370                                   | 0.386    | 0.352                                   | 0.366    | 0.359                                   | 0.361    | 0.372                                   | 0.419    |
| 240             | 0.359                                   | 0.385    | 0.344                                   | 0.365    | 0.347                                   | 0.360    | 0.363                                   | 0.420    |
| 250             | 0.348                                   | 0.382    | 0.331                                   | 0.362    | 0.339                                   | 0.355    | 0.356                                   | 0.417    |
| 260             | 0.344                                   | 0.382    | 0.326                                   | 0.359    | 0.328                                   | 0.350    | 0.350                                   | 0.415    |
| 270             | 0.336                                   | 0.379    | 0.321                                   | 0.356    | 0.324                                   | 0.346    | 0.347                                   | 0.411    |
| 280             | 0.333                                   | 0.377    | 0.321                                   | 0.353    | 0.319                                   | 0.342    | 0.344                                   | 0.408    |



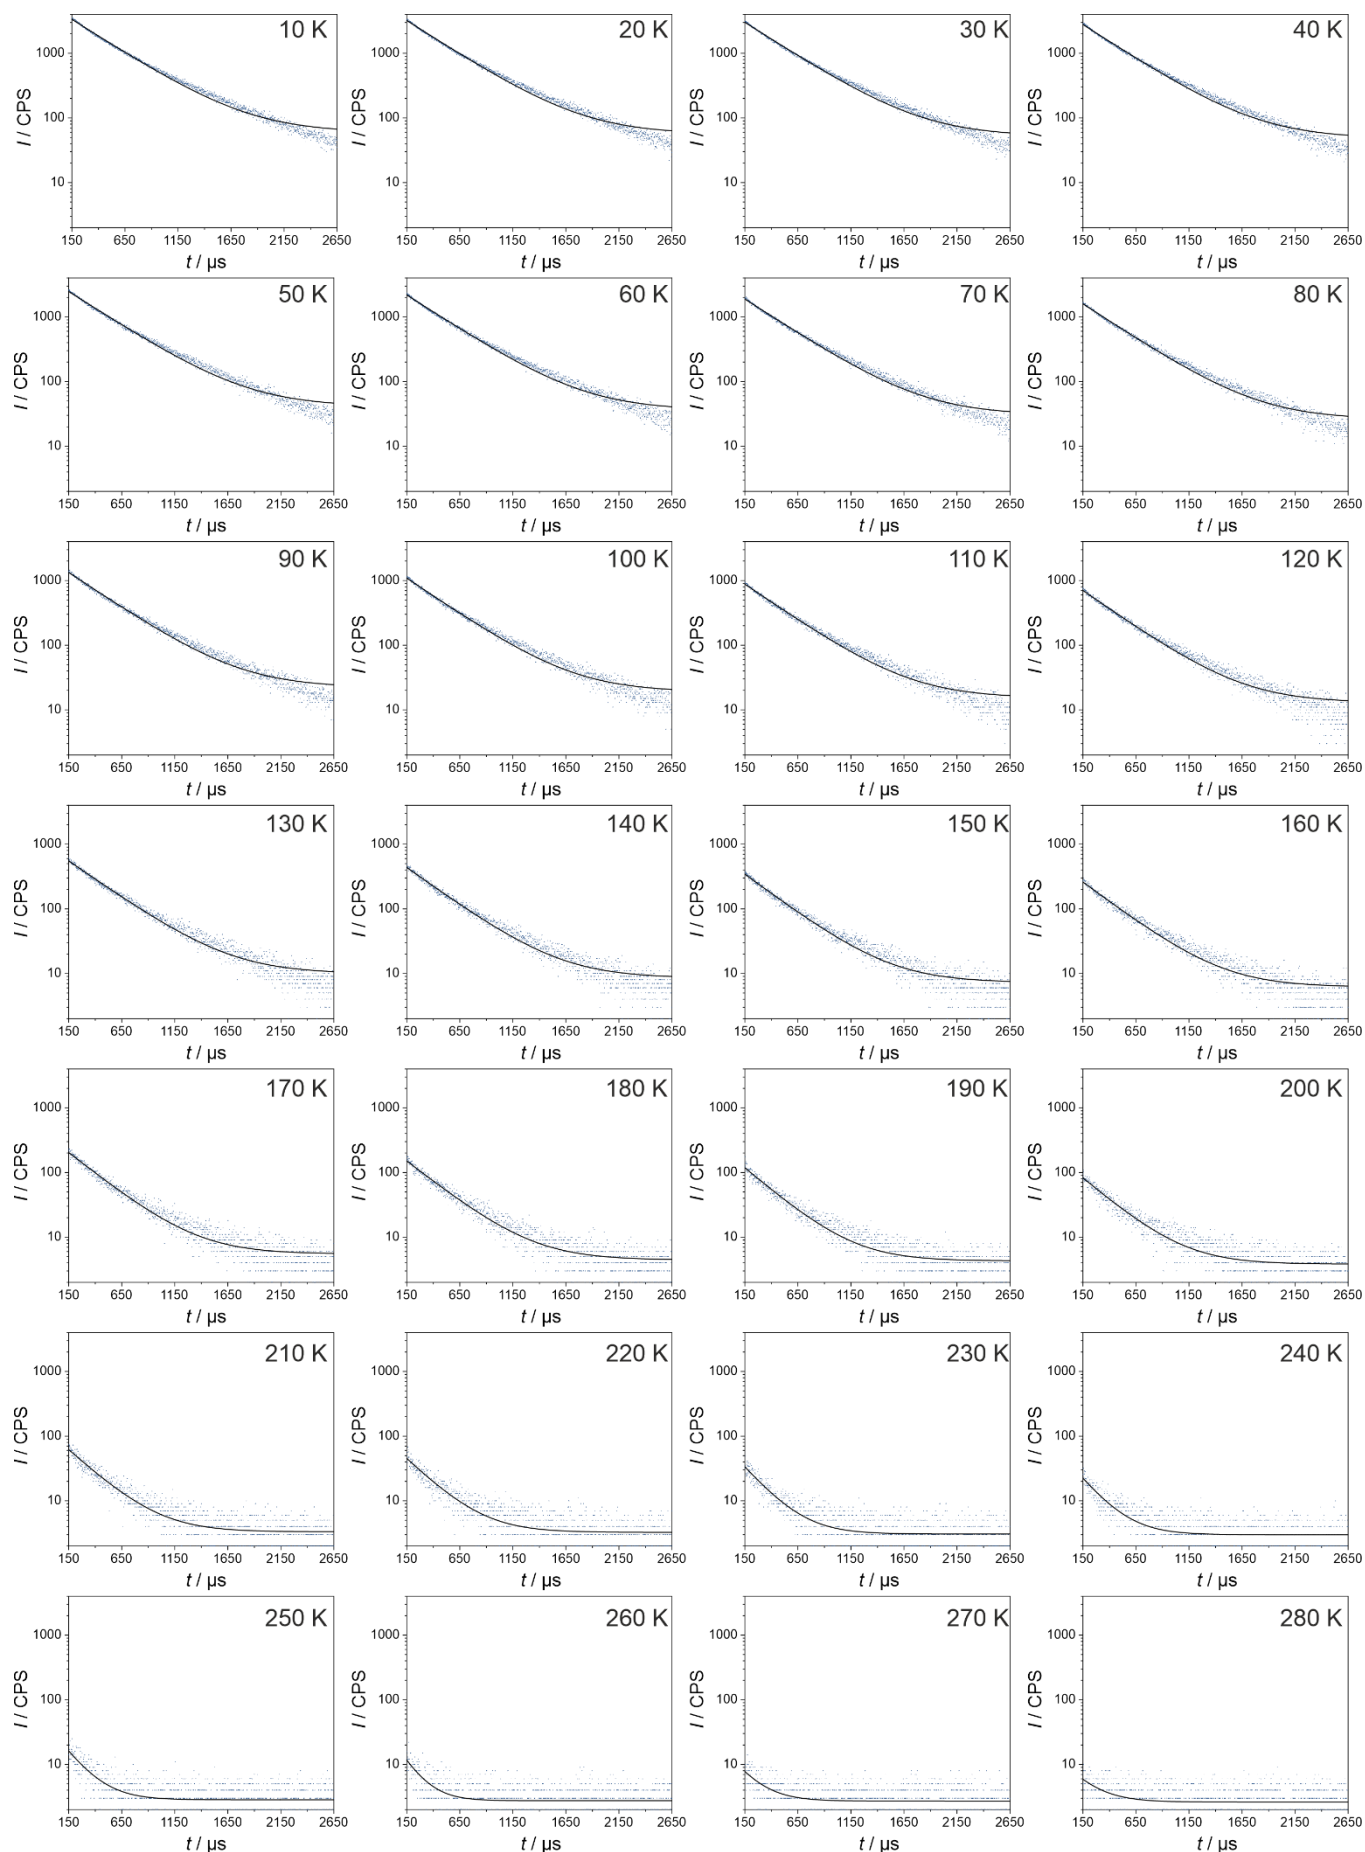

**Fig. S19** Emission decay profiles for  $\text{Eu}_2\text{Ir}_2$  under the 356 nm excitation and the monitored 617 nm emission at variable indicated temperatures. Dots represent experimental data while solid lines show the best fits to the mono-exponential decay function (see Table S12).

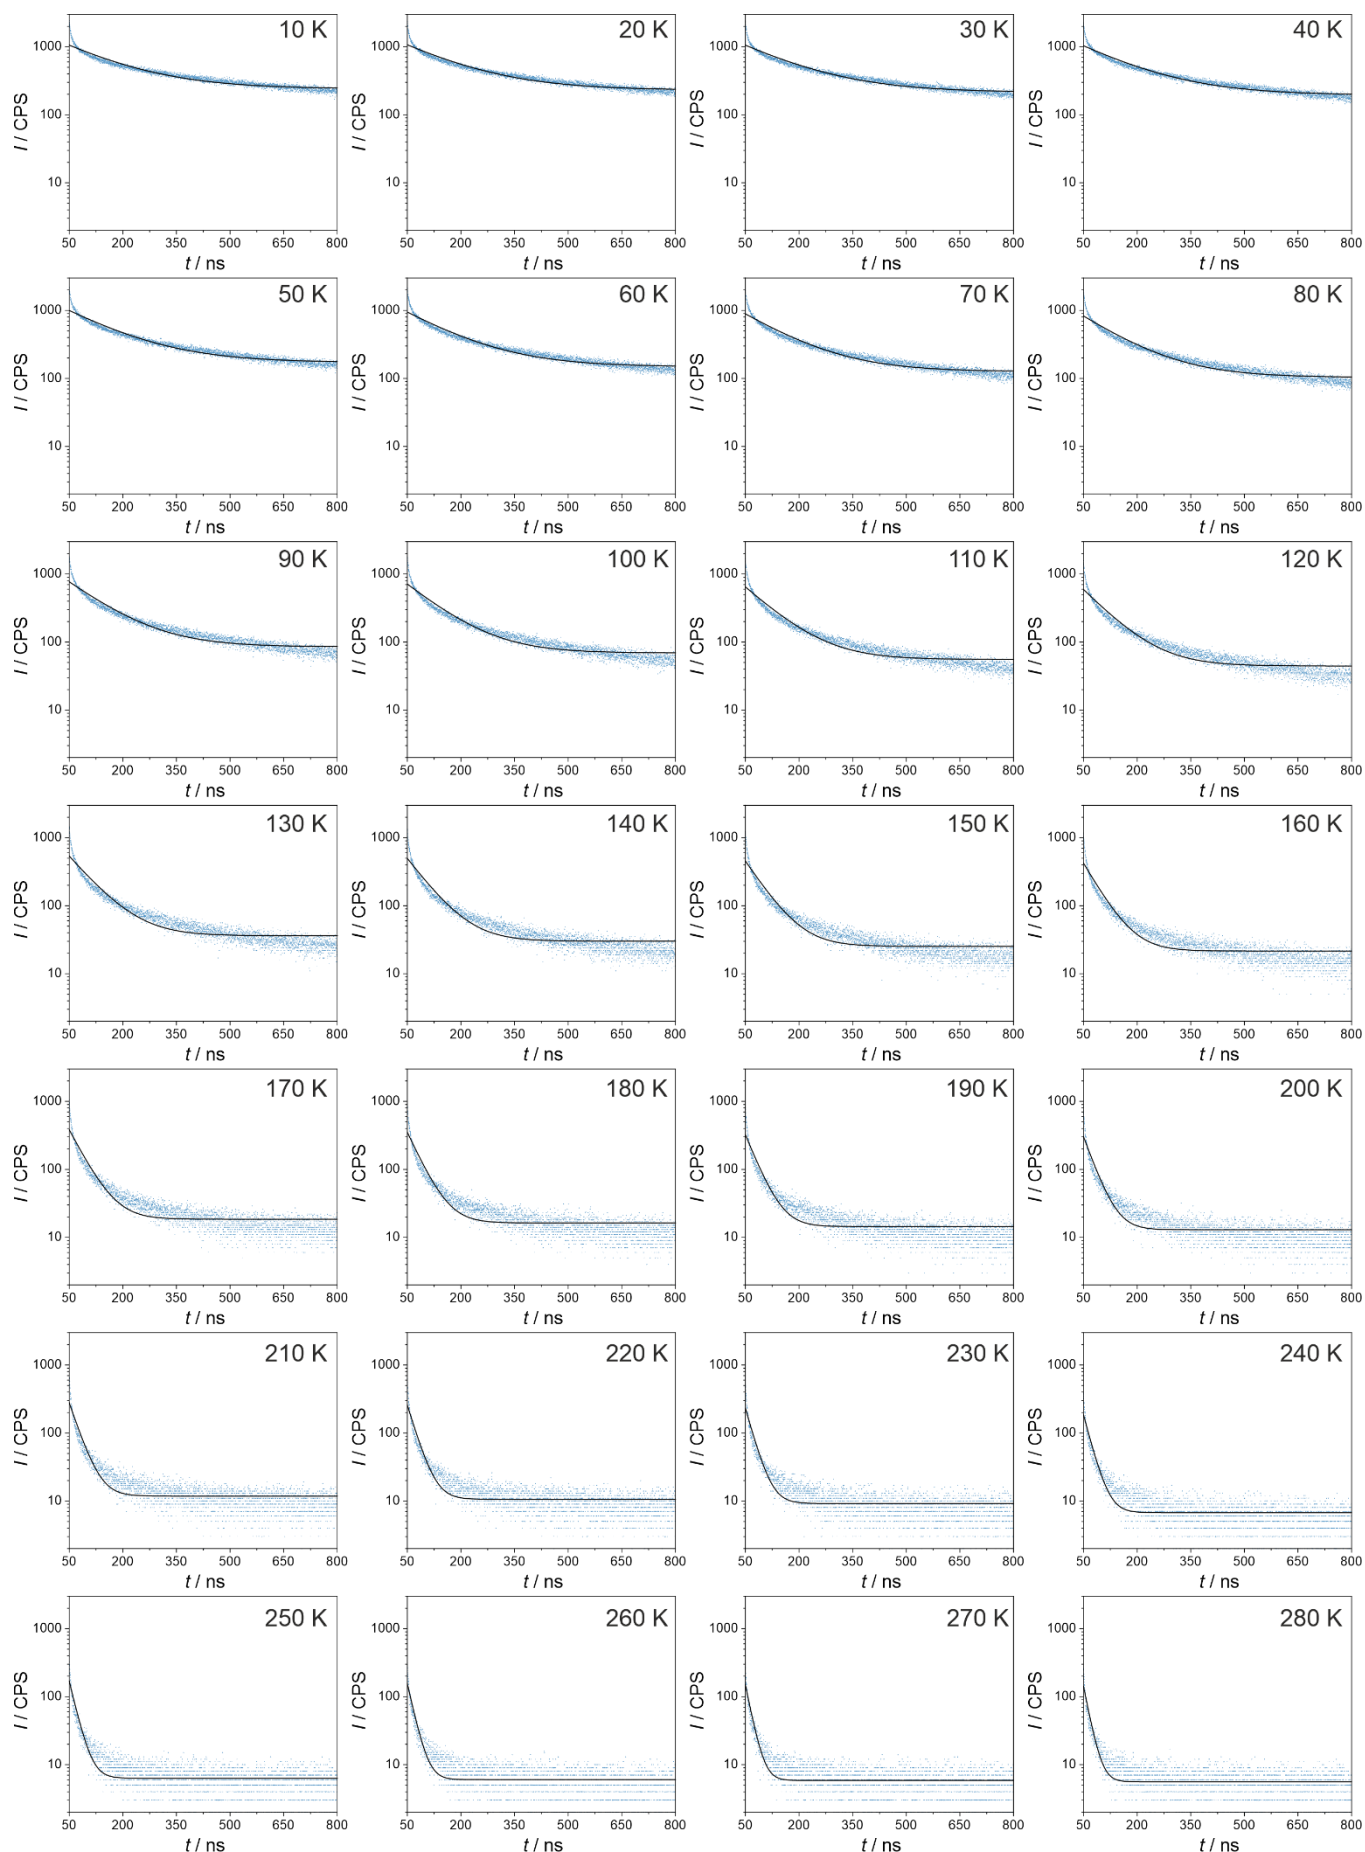

**Fig. S20** Emission decay profiles for  $\text{Eu}_2\text{Ir}_2$  under the 374 nm excitation and the monitored 470 nm emission at variable indicated temperatures. Dots represent experimental data while solid lines show the best fits to the mono-exponential decay function (see Table S13).

**Table S12** The best-fit parameters for emission decay profiles of **Eu<sub>2</sub>Ir<sub>2</sub>** for the emission at 617 nm under the excitation at 356 nm (see Fig. S19 and the comment placed below Table S10).

| Temperature / K | $\tau(\pm\tau)$ / $\mu$ s | $\chi^2$ | Temperature / K | $\tau(\pm\tau)$ / $\mu$ s | $\chi^2$ |
|-----------------|---------------------------|----------|-----------------|---------------------------|----------|
| 10              | 412.633( $\pm$ 1.230)     | 0.999    | 150             | 355.214( $\pm$ 2.145)     | 0.999    |
| 20              | 409.920( $\pm$ 1.228)     | 0.999    | 160             | 351.579( $\pm$ 2.475)     | 0.999    |
| 30              | 410.540( $\pm$ 1.177)     | 0.999    | 170             | 332.431( $\pm$ 2.537)     | 0.999    |
| 40              | 407.313( $\pm$ 1.260)     | 0.999    | 180             | 336.015( $\pm$ 2.984)     | 0.999    |
| 50              | 410.168( $\pm$ 1.280)     | 0.999    | 190             | 307.862( $\pm$ 3.448)     | 0.999    |
| 60              | 407.540( $\pm$ 1.294)     | 0.999    | 200             | 308.599( $\pm$ 3.799)     | 0.999    |
| 70              | 405.559( $\pm$ 1.293)     | 0.999    | 210             | 286.961( $\pm$ 4.153)     | 0.999    |
| 80              | 401.399( $\pm$ 1.329)     | 0.999    | 220             | 268.030( $\pm$ 5.273)     | 0.999    |
| 90              | 394.430( $\pm$ 1.492)     | 0.999    | 230             | 227.890( $\pm$ 5.196)     | 0.999    |
| 100             | 388.149( $\pm$ 1.531)     | 0.999    | 240             | 211.437( $\pm$ 6.793)     | 0.999    |
| 110             | 385.506( $\pm$ 1.587)     | 0.999    | 250             | 192.326( $\pm$ 8.980)     | 0.999    |
| 120             | 377.681( $\pm$ 1.703)     | 0.999    | 260             | 156.187( $\pm$ 10.868)    | 0.999    |
| 130             | 377.844( $\pm$ 1.825)     | 0.999    | 270             | 189.392( $\pm$ 20.279)    | 0.999    |
| 140             | 366.785( $\pm$ 2.029)     | 0.999    | 280             | 206.265( $\pm$ 32.178)    | 0.999    |

**Table S13** The best-fit parameters for emission decay profiles of **Eu<sub>2</sub>Ir<sub>2</sub>** for the emission at 470 nm under the excitation at 374 nm (see Fig. S20 and the comment placed below Table S10).

| Temperature / K | $\tau(\pm\tau)$ / ns  | $\chi^2$ | Temperature / K | $\tau(\pm\tau)$ / ns | $\chi^2$ |
|-----------------|-----------------------|----------|-----------------|----------------------|----------|
| 10              | 156.537( $\pm$ 1.383) | 0.999    | 150             | 53.962( $\pm$ 0.507) | 0.999    |
| 20              | 157.354( $\pm$ 1.311) | 0.999    | 160             | 46.815( $\pm$ 0.455) | 0.999    |
| 30              | 157.936( $\pm$ 1.308) | 0.999    | 170             | 42.259( $\pm$ 0.426) | 0.999    |
| 40              | 153.837( $\pm$ 1.232) | 0.999    | 180             | 37.314( $\pm$ 0.398) | 0.999    |
| 50              | 147.062( $\pm$ 1.137) | 0.999    | 190             | 32.959( $\pm$ 0.369) | 0.999    |
| 60              | 139.369( $\pm$ 1.074) | 0.999    | 200             | 29.582( $\pm$ 0.340) | 0.999    |
| 70              | 129.621( $\pm$ 0.996) | 0.999    | 210             | 27.451( $\pm$ 0.327) | 0.999    |
| 80              | 121.352( $\pm$ 0.939) | 0.999    | 220             | 24.637( $\pm$ 0.298) | 0.999    |
| 90              | 109.421( $\pm$ 0.856) | 0.999    | 230             | 22.726( $\pm$ 0.288) | 0.999    |
| 100             | 99.851( $\pm$ 0.788)  | 0.999    | 240             | 21.427( $\pm$ 0.272) | 0.999    |
| 110             | 88.882( $\pm$ 0.717)  | 0.999    | 250             | 19.372( $\pm$ 0.257) | 0.999    |
| 120             | 79.164( $\pm$ 0.660)  | 0.999    | 260             | 18.055( $\pm$ 0.255) | 0.999    |
| 130             | 70.012( $\pm$ 0.609)  | 0.999    | 270             | 16.316( $\pm$ 0.249) | 0.999    |
| 140             | 61.363( $\pm$ 0.546)  | 0.999    | 280             | 15.941( $\pm$ 0.240) | 0.999    |

## Comment on ratiometric optical thermometry studies

Compounds **Eu<sub>2</sub>Flr<sub>2</sub>** and **Eu<sub>2</sub>Ir<sub>2</sub>** exhibit temperature-dependent photoluminescence in the temperature range from 10 to 280 K. During the analysis of the related data, a few different approaches toward ratiometric optical thermometry were tested. The first approach was based on the ratios between emission/excitation intensities at two specific wavelengths at which maxima were present at 10 K (e.g.,  $I_{617.0}/I_{470.0}$ ). In this manner, most of the thermometric parameters were established; it is worth mentioning that this approach was used both for excitation and emission spectra. The second approach was based on the ratio between areas under the signal and was performed only for emission spectra due to the good separation of the emission bands. The acronyms of the signal are:  $A_{Ir}$  – emission integrated in the region of 440–540 nm for **Eu<sub>2</sub>Flr<sub>2</sub>** and 450–550 nm for **Eu<sub>2</sub>Ir<sub>2</sub>**,  $A_{590}$  – emission integrated in the 582–604 nm range,  $A_{617}$  – emission integrated in the 610–630 nm range,  $A_{690}$  – emission integrated in the 680–715 nm range. Emission lifetime is independent of such parameters as the amount of the sample, size of the crystals, and experimental setup, thus the thermal dependency of emission lifetime can be used directly as a thermometric parameter. Moreover, the ratio of emission lifetimes for two different metal centers was also considered as a thermometric parameter. For all of the temperature-dependent thermometric parameters  $\Delta$  constructed based on emission intensities, a classical Mott-Seitz model was applied, under the assumption of the existence of one or two nonradiative channels of emission quenching:

$$\Delta(T) = \frac{\Delta_0}{1 + \alpha \exp\left(\frac{-\Delta E}{k_B T}\right)} \text{ or } \Delta(T) = \frac{\Delta_0}{1 + \alpha_1 \exp\left(\frac{-\Delta E_1}{k_B T}\right) + \alpha_2 \exp\left(\frac{-\Delta E_2}{k_B T}\right)}$$

where:

$\Delta_0$  = thermometric parameter at 0 K,

$\alpha_x = \frac{W_0}{W_R}$  the ratio of non-radiative ( $W_0$  at 0 K) and radiative ( $W_R$ ) rates of decay,

$\Delta E_x$  = activation energy of non-radiative channel.

All parameters obtained from the fitting following the above-presented equation to the gathered experimental points are presented in Tables S14–S23. To compare the performance of different thermometer parameters, a relative thermal sensitivity ( $S_r$ ), derived from fitted curves, was used:

$$S_r = \frac{\left| \frac{\partial \Delta}{\partial T} \right|}{\Delta}$$

Then, temperature uncertainty was calculated, for the ratios of intensities, by the following equation:

$$\delta T = \left( \frac{\delta \Delta}{\Delta} \right) \left( \frac{1}{S_r} \right) = \left( \sqrt{\left( \frac{\delta_{DET}}{I_1} \right)^2 + \left( \frac{\delta_{DET}}{I_2} \right)^2} \right) \left( \frac{1}{S_r} \right)$$

However, for the temperature uncertainty of thermometric parameters derived from the areas under the curve, a different function was applied:

$$\delta T = \left( \frac{\delta \Delta}{\Delta} \right) \left( \frac{1}{S_r} \right) = \left( \sqrt{\left( \frac{\delta_{DET} \sqrt{0.5 \text{ nm} \times \lambda_{range 1}}}{A_1} \right)^2 + \left( \frac{\delta_{DET} \sqrt{0.5 \text{ nm} \times \lambda_{range 2}}}{A_2} \right)^2} \right) \left( \frac{1}{S_r} \right)$$

where:

$\frac{\delta \Delta}{\Delta}$  is the uncertainty of the thermometric parameter,  $S_r$  is the relative thermal sensitivity,  $\delta_{DET}$  is the uncertainty of the detector equal to 100 CPS (value determined based on the standard deviation of the noise related to the accessible detector),  $I_1$  and  $I_2$  are the values of the intensity at specific points in a non-normalized, non-smoothed emission spectrum,  $A_1$  and  $A_2$  are areas under different emission bands, 0.5 nm is related to the wavelength increment and  $\lambda_{range 1}$  and  $\lambda_{range 2}$  are the range of integration for selected bands. Despite excellent fitting parameters, some parameters of the Mott-Seitz model were found with high uncertainty and should be considered with great caution.<sup>S16</sup>

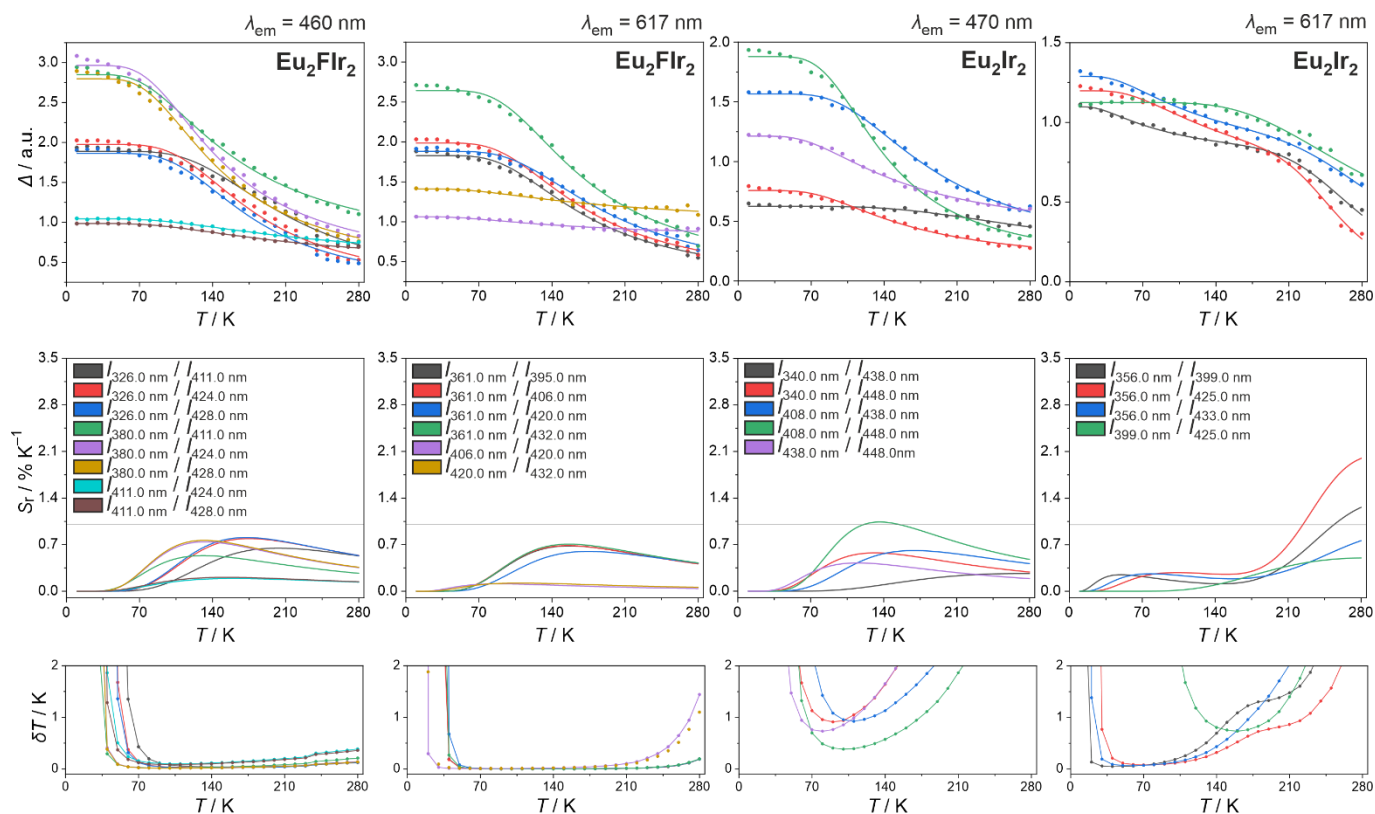

**Fig. S21** The full set of the characteristics of ratiometric optical thermometry based on temperature-variable excitation spectra of **Eu<sub>2</sub>Flr<sub>2</sub>** (left side, based on the spectra presented in Fig. S13) and **Eu<sub>2</sub>Ir<sub>2</sub>** (right side, based on the spectra presented in Fig. S17), including the temperature dependences of thermometric parameters defined as depicted in the figures, based on the excitation spectra for the indicated monitored emission maxima (top part), the resulting temperature dependences of relative thermal sensitivity (middle part), and the related temperature uncertainties (bottom part). The experimental data in the top part (colored points) were fitted to the Mott-Seitz model (see the Comment on ratiometric optical thermometry studies above). The best-fit curves are shown as colored solid lines, while the resulting best-fit parameters are gathered in Table S14. The relative thermal sensitivity and temperature uncertainties were calculated based on the corresponding  $\Delta(T)$  dependences (see the Comment on ratiometric optical thermometry studies above).

**Table S14** Best-fit parameters to the Mott-Seitz model for the ratiometric luminescent thermometry based on the excitation spectra of **Eu<sub>2</sub>Flr<sub>2</sub>** and **Eu<sub>2</sub>Ir<sub>2</sub>** (see Fig. S21 for the related optical characteristics).

| $\Delta$                                            | Parameters of the Mott-Seitz model            |                                  |                          |                                     |                                     | $\chi^2$ |
|-----------------------------------------------------|-----------------------------------------------|----------------------------------|--------------------------|-------------------------------------|-------------------------------------|----------|
|                                                     | $\Delta_0$                                    | $\alpha_1$                       | $\alpha_2$               | $\Delta E_1$ / kJ mol <sup>-1</sup> | $\Delta E_2$ / kJ mol <sup>-1</sup> |          |
| $\lambda_{\text{em}} = 460 \text{ nm}$              | Compound <b>Eu<sub>2</sub>Flr<sub>2</sub></b> |                                  |                          |                                     |                                     |          |
| $\frac{I_{326.0 \text{ nm}}}{I_{411.0 \text{ nm}}}$ | 1.890<br>( $\pm 0.018$ )                      | 17.976<br>( $\pm 3.297$ )        | 0                        | 5.578<br>( $\pm 0.337$ )            | 0                                   | 0.999    |
| $\frac{I_{326.0 \text{ nm}}}{I_{424.0 \text{ nm}}}$ | 1.975<br>( $\pm 0.020$ )                      | 20.375<br>( $\pm 3.055$ )        | 0                        | 4.922<br>( $\pm 0.254$ )            | 0                                   | 0.999    |
| $\frac{I_{326.0 \text{ nm}}}{I_{428.0 \text{ nm}}}$ | 1.864<br>( $\pm 0.019$ )                      | 20.602<br>( $\pm 2.932$ )        | 0                        | 4.855<br>( $\pm 0.239$ )            | 0                                   | 0.999    |
| $\frac{I_{380.0 \text{ nm}}}{I_{411.0 \text{ nm}}}$ | 2.850<br>( $\pm 0.020$ )                      | 5.224<br>( $\pm 0.329$ )         | 0                        | 2.944<br>( $\pm 0.106$ )            | 0                                   | 0.999    |
| $\frac{I_{380.0 \text{ nm}}}{I_{424.0 \text{ nm}}}$ | 2.965<br>( $\pm 0.022$ )                      | 9.710<br>( $\pm 0.670$ )         | 0                        | 3.286<br>( $\pm 0.108$ )            | 0                                   | 0.999    |
| $\frac{I_{380.0 \text{ nm}}}{I_{428.0 \text{ nm}}}$ | 2.798<br>( $\pm 0.021$ )                      | 10.193<br>( $\pm 0.701$ )        | 0                        | 3.296<br>( $\pm 0.107$ )            | 0                                   | 0.999    |
| $\frac{I_{411.0 \text{ nm}}}{I_{424.0 \text{ nm}}}$ | 1.044<br>( $\pm 0.003$ )                      | 1.526<br>( $\pm 0.074$ )         | 0                        | 3.061<br>( $\pm 0.096$ )            | 0                                   | 0.999    |
| $\frac{I_{411.0 \text{ nm}}}{I_{428.0 \text{ nm}}}$ | 0.986<br>( $\pm 0.003$ )                      | 1.623<br>( $\pm 0.075$ )         | 0                        | 2.956<br>( $\pm 0.090$ )            | 0                                   | 0.999    |
| $\lambda_{\text{em}} = 617 \text{ nm}$              | Compound <b>Eu<sub>2</sub>Flr<sub>2</sub></b> |                                  |                          |                                     |                                     |          |
| $\frac{I_{361.0 \text{ nm}}}{I_{395.0 \text{ nm}}}$ | 1.829<br>( $\pm 0.012$ )                      | 11.504<br>( $\pm 0.895$ )        | 0                        | 4.004<br>( $\pm 0.130$ )            | 0                                   | 0.999    |
| $\frac{I_{361.0 \text{ nm}}}{I_{406.0 \text{ nm}}}$ | 1.987<br>( $\pm 0.012$ )                      | 11.418<br>( $\pm 0.805$ )        | 0                        | 3.957<br>( $\pm 0.118$ )            | 0                                   | 0.999    |
| $\frac{I_{361.0 \text{ nm}}}{I_{420.0 \text{ nm}}}$ | 1.883<br>( $\pm 0.011$ )                      | 11.035<br>( $\pm 0.939$ )        | 0                        | 4.436<br>( $\pm 0.151$ )            | 0                                   | 0.999    |
| $\frac{I_{361.0 \text{ nm}}}{I_{432.0 \text{ nm}}}$ | 2.644<br>( $\pm 0.018$ )                      | 12.367<br>( $\pm 0.977$ )        | 0                        | 4.041<br>( $\pm 0.131$ )            | 0                                   | 0.999    |
| $\frac{I_{406.0 \text{ nm}}}{I_{420.0 \text{ nm}}}$ | 1.062<br>( $\pm 0.007$ )                      | 0.405<br>( $\pm 0.039$ )         | 0                        | 1.562<br>( $\pm 0.191$ )            | 0                                   | 0.999    |
| $\frac{I_{320.0 \text{ nm}}}{I_{432.0 \text{ nm}}}$ | 1.411<br>( $\pm 0.009$ )                      | 0.566<br>( $\pm 0.056$ )         | 0                        | 1.933<br>( $\pm 0.198$ )            | 0                                   | 0.999    |
| $\lambda_{\text{em}} = 470 \text{ nm}$              | Compound <b>Eu<sub>2</sub>Ir<sub>2</sub></b>  |                                  |                          |                                     |                                     |          |
| $\frac{I_{340.0 \text{ nm}}}{I_{438.0 \text{ nm}}}$ | 0.625<br>( $\pm 0.004$ )                      | 5.641<br>( $\pm 1.818$ )         | 0                        | 6.265<br>( $\pm 0.670$ )            | 0                                   | 0.999    |
| $\frac{I_{340.0 \text{ nm}}}{I_{448.0 \text{ nm}}}$ | 0.758<br>( $\pm 0.006$ )                      | 5.975<br>( $\pm 0.429$ )         | 0                        | 3.020<br>( $\pm 0.119$ )            | 0                                   | 0.999    |
| $\frac{I_{408.0 \text{ nm}}}{I_{438.0 \text{ nm}}}$ | 1.567<br>( $\pm 0.007$ )                      | 10.714<br>( $\pm 0.663$ )        | 0                        | 4.266<br>( $\pm 0.108$ )            | 0                                   | 0.999    |
| $\frac{I_{408.0 \text{ nm}}}{I_{448.0 \text{ nm}}}$ | 1.880<br>( $\pm 0.013$ )                      | 21.569<br>( $\pm 1.551$ )        | 0                        | 3.869<br>( $\pm 0.103$ )            | 0                                   | 0.999    |
| $\frac{I_{438.0 \text{ nm}}}{I_{448.0 \text{ nm}}}$ | 1.213<br>( $\pm 0.006$ )                      | 2.943<br>( $\pm 0.124$ )         | 0                        | 2.384<br>( $\pm 0.073$ )            | 0                                   | 0.999    |
| $\lambda_{\text{em}} = 617 \text{ nm}$              | Compound <b>Eu<sub>2</sub>Ir<sub>2</sub></b>  |                                  |                          |                                     |                                     |          |
| $\frac{I_{356.0 \text{ nm}}}{I_{399.0 \text{ nm}}}$ | 1.097<br>( $\pm 0.011$ )                      | 1704.610<br>( $\pm 1035.538$ )   | 0.518<br>( $\pm 0.048$ ) | 16.774<br>( $\pm 1.348$ )           | 0.878<br>( $\pm 0.113$ )            | 0.999    |
| $\frac{I_{356.0 \text{ nm}}}{I_{425.0 \text{ nm}}}$ | 1.198<br>( $\pm 0.009$ )                      | 15152.961<br>( $\pm 11219.332$ ) | 1.438<br>( $\pm 0.225$ ) | 19.979<br>( $\pm 1.623$ )           | 1.973<br>( $\pm 0.198$ )            | 0.999    |
| $\frac{I_{356.0 \text{ nm}}}{I_{433.0 \text{ nm}}}$ | 1.289<br>( $\pm 0.011$ )                      | 447.212<br>( $\pm 463.448$ )     | 0.928<br>( $\pm 0.115$ ) | 15.177<br>( $\pm 2.392$ )           | 1.425<br>( $\pm 0.149$ )            | 0.999    |
| $\frac{I_{399.0 \text{ nm}}}{I_{425.0 \text{ nm}}}$ | 1.124<br>( $\pm 0.007$ )                      | 22.585<br>( $\pm 6.657$ )        | 0                        | 8.224<br>( $\pm 0.611$ )            | 0                                   | 0.999    |

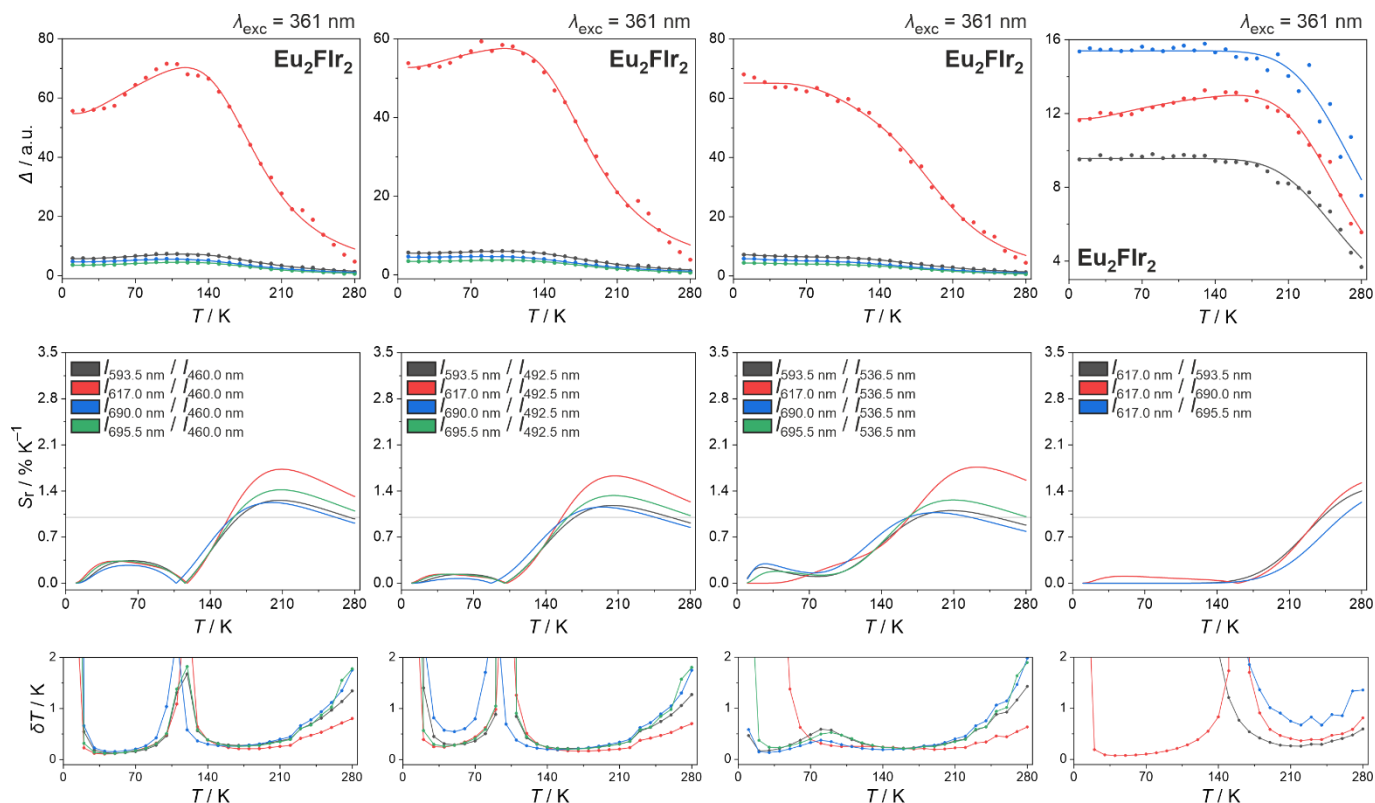

**Fig. S22** The full set of the characteristics of ratiometric optical thermometry based on temperature-variable emission spectra of  $\text{Eu}_2\text{Flr}_2$  (the 361 nm excitation, based on the spectra presented in Fig. S13), divided into four parts (columns) representing different types of applied intensity ratios. In each case, the set of data includes the temperature dependences of thermometric parameters defined as depicted in the figures (top part), the resulting temperature dependences of relative thermal sensitivity (middle part), and the related temperature uncertainties (bottom part). The experimental data in the top part (colored points) were fitted to the Mott-Seitz model (see the Comment on ratiometric optical thermometry studies above). The best-fit curves are shown as colored solid lines, while the resulting best-fit parameters are gathered in Table S15. The relative thermal sensitivity and temperature uncertainties were calculated based on the corresponding  $\Delta(T)$  dependences (see the Comment on ratiometric optical thermometry studies above).

**Table S15** Best-fit parameters to the Mott-Seitz model for the ratiometric luminescent thermometry based on the emission spectra of **Eu<sub>2</sub>Flr<sub>2</sub>** under the 361 nm excitation (see Fig. S22 for the related optical characteristics).

| $\Delta$                                            | Parameters of the Mott-Seitz model |                                |                            |                                   |                                   | $\chi^2$ |
|-----------------------------------------------------|------------------------------------|--------------------------------|----------------------------|-----------------------------------|-----------------------------------|----------|
|                                                     | $\Delta_0$                         | $\alpha_1$                     | $\alpha_2$                 | $\Delta E_1 / \text{kJ mol}^{-1}$ | $\Delta E_2 / \text{kJ mol}^{-1}$ |          |
| $\frac{I_{593.5 \text{ nm}}}{I_{460.0 \text{ nm}}}$ | 5.767<br>( $\pm 0.108$ )           | -0.660<br>( $\pm 0.154$ )      | 83.920<br>( $\pm 18.348$ ) | 0.961<br>( $\pm 0.217$ )          | 7.604<br>( $\pm 0.457$ )          | 0.999    |
| $\frac{I_{617.0 \text{ nm}}}{I_{460.0 \text{ nm}}}$ | 54.731<br>( $\pm 1.344$ )          | 337.632<br>( $\pm 101.933$ )   | -0.504<br>( $\pm 0.094$ )  | 9.614<br>( $\pm 0.559$ )          | 0.729<br>( $\pm 0.193$ )          | 0.999    |
| $\frac{I_{690.0 \text{ nm}}}{I_{460.0 \text{ nm}}}$ | 4.685<br>( $\pm 0.090$ )           | 74.676<br>( $\pm 17.001$ )     | -0.538<br>( $\pm 0.184$ )  | 7.131<br>( $\pm 0.473$ )          | 0.957<br>( $\pm 0.300$ )          | 0.999    |
| $\frac{I_{695.5 \text{ nm}}}{I_{460.0 \text{ nm}}}$ | 3.555<br>( $\pm 0.084$ )           | 139.027<br>( $\pm 36.598$ )    | -0.560<br>( $\pm 0.122$ )  | 8.360<br>( $\pm 0.517$ )          | 0.812<br>( $\pm 0.214$ )          | 0.999    |
| $\frac{I_{593.5 \text{ nm}}}{I_{492.5 \text{ nm}}}$ | 5.533<br>( $\pm 0.084$ )           | 84.276<br>( $\pm 18.040$ )     | -0.293<br>( $\pm 0.168$ )  | 7.377<br>( $\pm 0.446$ )          | 120.123<br>( $\pm 60.373$ )       | 0.999    |
| $\frac{I_{617.0 \text{ nm}}}{I_{492.5 \text{ nm}}}$ | 52.734<br>( $\pm 1.231$ )          | 315.815<br>( $\pm 92.858$ )    | -0.193<br>( $\pm 0.085$ )  | 9.193<br>( $\pm 0.535$ )          | 77.939<br>( $\pm 51.645$ )        | 0.999    |
| $\frac{I_{690.0 \text{ nm}}}{I_{492.5 \text{ nm}}}$ | 4.494<br>( $\pm 0.082$ )           | -0.153<br>( $\pm 0.225$ )      | 72.956<br>( $\pm 18.122$ ) | 0.977<br>( $\pm 1.202$ )          | 821.534<br>( $\pm 61.702$ )       | 0.999    |
| $\frac{I_{695.5 \text{ nm}}}{I_{492.5 \text{ nm}}}$ | 3.419<br>( $\pm 0.074$ )           | 134.847<br>( $\pm 35.632$ )    | -0.224<br>( $\pm 0.117$ )  | 8.033<br>( $\pm 0.510$ )          | 90.518<br>( $\pm 57.892$ )        | 0.999    |
| $\frac{I_{593.5 \text{ nm}}}{I_{536.5 \text{ nm}}}$ | 7.147<br>( $\pm 0.114$ )           | 97.975<br>( $\pm 14.879$ )     | 0.230<br>( $\pm 0.036$ )   | 7.434<br>( $\pm 0.286$ )          | 0.415<br>( $\pm 0.132$ )          | 0.999    |
| $\frac{I_{617.0 \text{ nm}}}{I_{536.5 \text{ nm}}}$ | 65.126<br>( $\pm 0.656$ )          | 1556.637<br>( $\pm 1127.311$ ) | 3.401<br>( $\pm 2.539$ )   | 12.420<br>( $\pm 1.554$ )         | 3.059<br>( $\pm 0.760$ )          | 0.999    |
| $\frac{I_{690.0 \text{ nm}}}{I_{536.5 \text{ nm}}}$ | 5.816<br>( $\pm 0.091$ )           | 74.261<br>( $\pm 11.282$ )     | 0.325<br>( $\pm 0.052$ )   | 6.579<br>( $\pm 0.283$ )          | 0.474<br>( $\pm 0.125$ )          | 0.999    |
| $\frac{I_{695.5 \text{ nm}}}{I_{536.5 \text{ nm}}}$ | 4.362<br>( $\pm 0.071$ )           | 164.156<br>( $\pm 37.192$ )    | 0.272<br>( $\pm 0.080$ )   | 8.173<br>( $\pm 0.429$ )          | 0.653<br>( $\pm 0.256$ )          | 0.999    |
| $\frac{I_{617.0 \text{ nm}}}{I_{593.5 \text{ nm}}}$ | 9.557<br>( $\pm 0.063$ )           | 1342.351<br>( $\pm 731.998$ )  | 0                          | 16.168<br>( $\pm 1.154$ )         | 0                                 | 0.999    |
| $\frac{I_{617.0 \text{ nm}}}{I_{690.0 \text{ nm}}}$ | 11.715<br>( $\pm 0.184$ )          | 1915.383<br>( $\pm 1083.864$ ) | -0.188<br>( $\pm 0.043$ )  | 17.153<br>( $\pm 1.251$ )         | 0.811<br>( $\pm 0.326$ )          | 0.999    |
| $\frac{I_{617.0 \text{ nm}}}{I_{695.5 \text{ nm}}}$ | 15.398<br>( $\pm 0.139$ )          | 1631.744<br>( $\pm 1720.830$ ) | 0                          | 17.654<br>( $\pm 2.287$ )         | 0                                 | 0.999    |



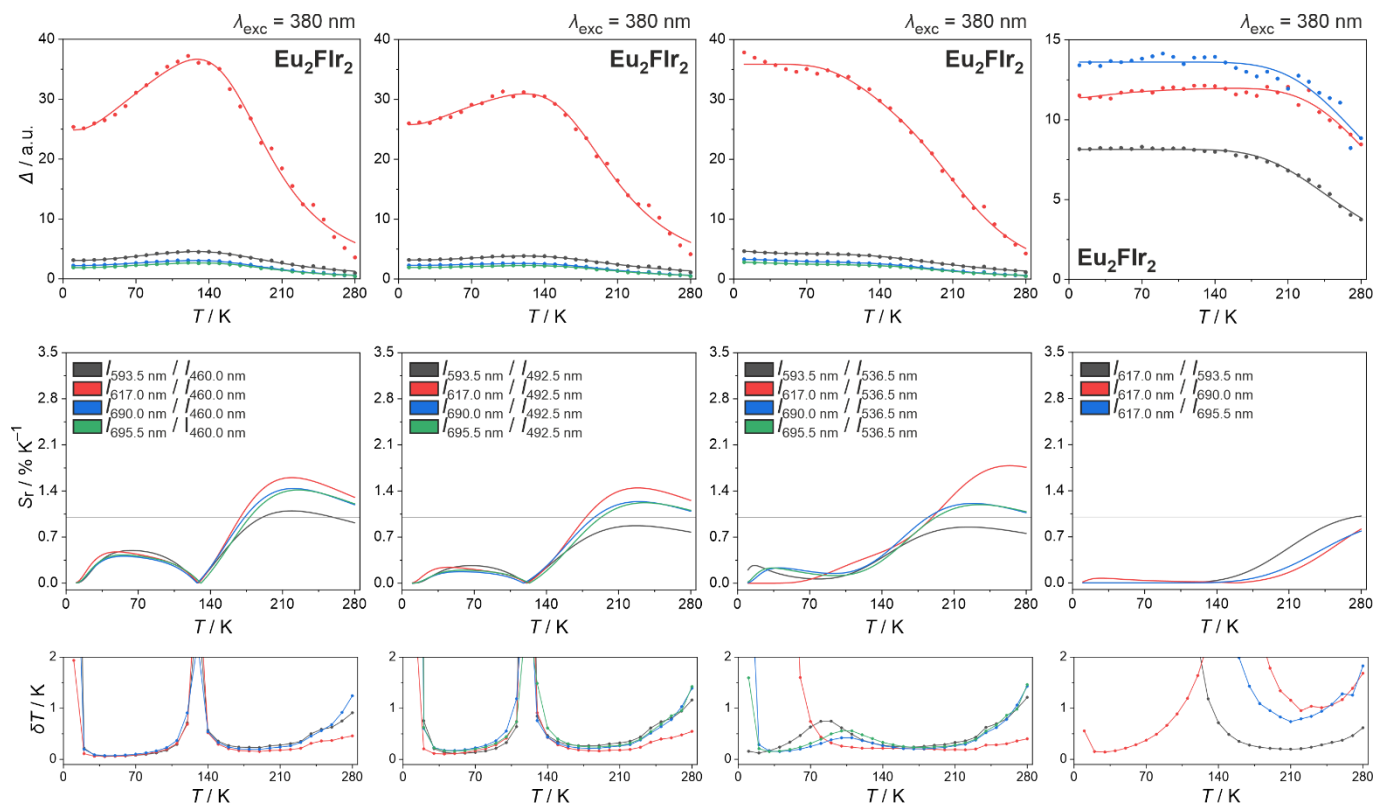

**Table S16** Best-fit parameters to the Mott-Seitz model for the ratiometric luminescent thermometry based on the emission spectra of **Eu<sub>2</sub>Flr<sub>2</sub>** under the 380 nm excitation (see Fig. S23 for the related optical characteristics).

| $\Delta$                                            | Parameters of the Mott-Seitz model |                                |                              |                                   |                                   | $\chi^2$ |
|-----------------------------------------------------|------------------------------------|--------------------------------|------------------------------|-----------------------------------|-----------------------------------|----------|
|                                                     | $\Delta_0$                         | $\alpha_1$                     | $\alpha_2$                   | $\Delta E_1 / \text{kJ mol}^{-1}$ | $\Delta E_2 / \text{kJ mol}^{-1}$ |          |
| $\frac{I_{593.5 \text{ nm}}}{I_{460.0 \text{ nm}}}$ | 3.066<br>( $\pm 0.072$ )           | 49.841<br>( $\pm 11.564$ )     | -0.863<br>( $\pm 0.140$ )    | 7.466<br>( $\pm 0.521$ )          | 0.903<br>( $\pm 0.161$ )          | 0.999    |
| $\frac{I_{617.0 \text{ nm}}}{I_{460.0 \text{ nm}}}$ | 24.845<br>( $\pm 0.711$ )          | -0.685<br>( $\pm 0.088$ )      | 238.925<br>( $\pm 72.241$ )  | 0.724<br>( $\pm 0.145$ )          | 9.758<br>( $\pm 0.588$ )          | 0.999    |
| $\frac{I_{690.0 \text{ nm}}}{I_{460.0 \text{ nm}}}$ | 2.193<br>( $\pm 0.056$ )           | -0.671<br>( $\pm 0.111$ )      | 162.873<br>( $\pm 47.628$ )  | 0.821<br>( $\pm 0.178$ )          | 9.179<br>( $\pm 0.589$ )          | 0.999    |
| $\frac{I_{695.5 \text{ nm}}}{I_{460.0 \text{ nm}}}$ | 1.855<br>( $\pm 0.049$ )           | -0.694<br>( $\pm 0.105$ )      | 160.914<br>( $\pm 48.244$ )  | 0.813<br>( $\pm 0.167$ )          | 9.399<br>( $\pm 0.612$ )          | 0.999    |
| $\frac{I_{593.5 \text{ nm}}}{I_{492.5 \text{ nm}}}$ | 3.175<br>( $\pm 0.059$ )           | 36.917<br>( $\pm 9.755$ )      | -0.584<br>( $\pm 0.198$ )    | 7.133<br>( $\pm 0.635$ )          | 1.066<br>( $\pm 0.314$ )          | 0.999    |
| $\frac{I_{617.0 \text{ nm}}}{I_{492.5 \text{ nm}}}$ | 25.771<br>( $\pm 0.554$ )          | -0.364<br>( $\pm 0.073$ )      | 251.774<br>( $\pm 71.098$ )  | 0.713<br>( $\pm 0.219$ )          | 9.968<br>( $\pm 0.559$ )          | 0.999    |
| $\frac{I_{690.0 \text{ nm}}}{I_{492.5 \text{ nm}}}$ | 2.273<br>( $\pm 0.047$ )           | -0.337<br>( $\pm 0.130$ )      | 143.678<br>( $\pm 45.433$ )  | 0.904<br>( $\pm 0.393$ )          | 9.104<br>( $\pm 0.657$ )          | 0.999    |
| $\frac{I_{695.5 \text{ nm}}}{I_{492.5 \text{ nm}}}$ | 1.925<br>( $\pm 0.034$ )           | 144.582<br>( $\pm 40.842$ )    | -0.386<br>( $\pm 0.111$ )    | 9.380<br>( $\pm 0.597$ )          | 0.931<br>( $\pm 0.301$ )          | 0.999    |
| $\frac{I_{593.5 \text{ nm}}}{I_{536.5 \text{ nm}}}$ | 4.666<br>( $\pm 0.114$ )           | 0.172<br>( $\pm 0.028$ )       | 54.756<br>( $\pm 9.395$ )    | 0.280<br>( $\pm 0.135$ )          | 7.315<br>( $\pm 0.344$ )          | 0.999    |
| $\frac{I_{617.0 \text{ nm}}}{I_{536.5 \text{ nm}}}$ | 35.858<br>( $\pm 0.305$ )          | 4083.998<br>( $\pm 4566.399$ ) | 7.295<br>( $\pm 4.799$ )     | 15.706<br>( $\pm 2.548$ )         | 4.167<br>( $\pm 0.766$ )          | 0.999    |
| $\frac{I_{690.0 \text{ nm}}}{I_{536.5 \text{ nm}}}$ | 3.270<br>( $\pm 0.051$ )           | 205.334<br>( $\pm 55.889$ )    | 0.386<br>( $\pm 0.082$ )     | 9.147<br>( $\pm 0.538$ )          | 0.711<br>( $\pm 0.195$ )          | 0.999    |
| $\frac{I_{695.5 \text{ nm}}}{I_{536.5 \text{ nm}}}$ | 2.786<br>( $\pm 0.052$ )           | 210.431<br>( $\pm 62.690$ )    | 0.312<br>( $\pm 0.064$ )     | 9.461<br>( $\pm 0.590$ )          | 0.585<br>( $\pm 0.195$ )          | 0.999    |
| $\frac{I_{617.0 \text{ nm}}}{I_{593.5 \text{ nm}}}$ | 8.141<br>( $\pm 0.032$ )           | 245.157<br>( $\pm 60.207$ )    | 0                            | 12.552<br>( $\pm 0.513$ )         | 0                                 | 0.999    |
| $\frac{I_{617.0 \text{ nm}}}{I_{690.0 \text{ nm}}}$ | 11.369<br>( $\pm 0.248$ )          | -0.073<br>( $\pm 0.025$ )      | 728.734<br>( $\pm 823.373$ ) | 0.458<br>( $\pm 0.453$ )          | 17.364<br>( $\pm 2.559$ )         | 0.999    |
| $\frac{I_{617.0 \text{ nm}}}{I_{695.5 \text{ nm}}}$ | 13.613<br>( $\pm 0.117$ )          | 286.166<br>( $\pm 290.687$ )   | 0                            | 14.590<br>( $\pm 2.207$ )         | 0                                 | 0.999    |

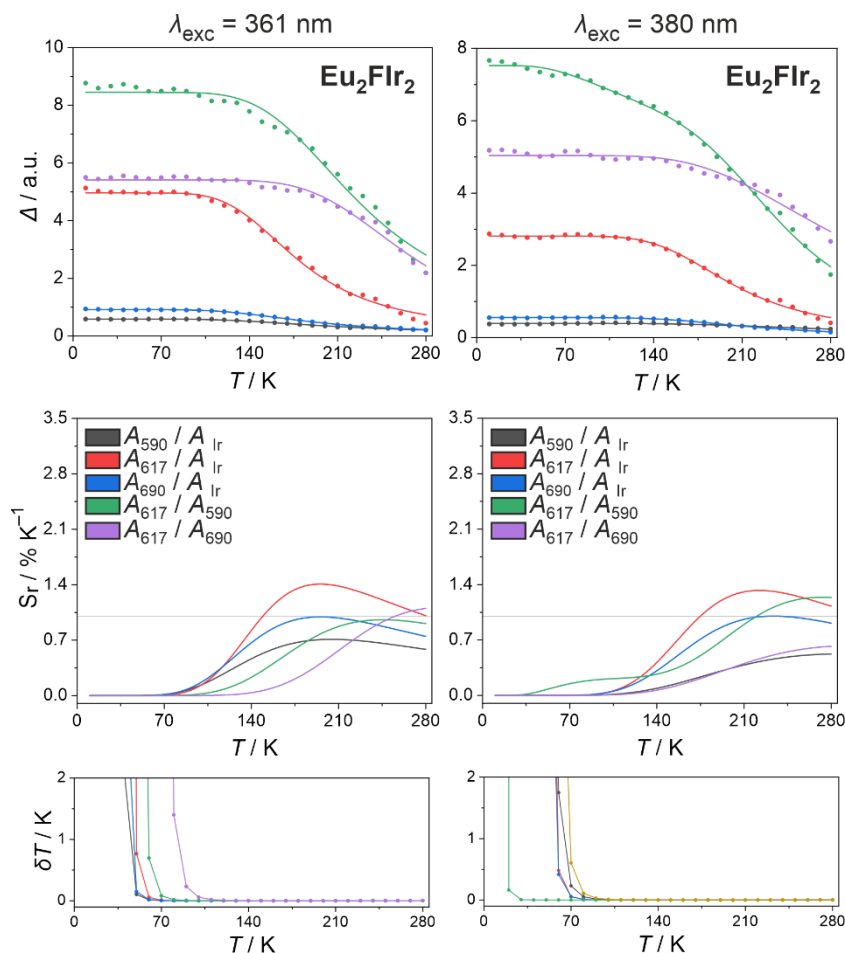

**Fig. S24** The full set of the characteristics of ratiometric optical thermometry based on temperature-variable emission spectra of **Eu<sub>2</sub>Flr<sub>2</sub>** using the ratios between the integrated areas of the indicated emission peaks (the maxima are indicated for the case of Eu(III)-based emission while the “Ir” stands for the broadband emission of Ir(III) complexes, the respective emission spectra are shown in Fig. S13) instead of the ratios between the intensities for the selected emission maxima (as was used in optical thermometry presented in Fig. S22 and S23). The set of characteristics for the 361 nm excitation is presented on the left side, while those for the 380 nm excitation are on the right side. In each case, the set of data includes the temperature dependences of thermometric parameters defined as depicted in the figures (top part), the resulting temperature dependences of relative thermal sensitivity (middle part), and the related temperature uncertainties (bottom part). The experimental data in the top part (colored points) were fitted to the Mott-Seitz model (see the Comment on ratiometric optical thermometry studies above). The best-fit curves are shown as colored solid lines, while the resulting best-fit parameters are gathered in Table S17. The relative thermal sensitivity and temperature uncertainties were calculated based on the corresponding  $\Delta(T)$  dependences (see the Comment on ratiometric optical thermometry studies above).

**Table S17** Best-fit parameters to the Mott-Seitz model for the ratiometric luminescent thermometry based on the emission spectra of **Eu<sub>2</sub>Flr<sub>2</sub>** under the 361 and 380 nm excitation using the ratios between the integrated areas of the indicated emission peaks (the maxima are indicated for the case of Eu(III)-based emission while the “Ir” stands for the broadband emission of Ir(III) complexes, see Fig. S24 for the related optical characteristics).

| $\Delta$                               | Parameters of the Mott-Seitz Model |                              |                          |                                     |                                     | $\chi^2$ |
|----------------------------------------|------------------------------------|------------------------------|--------------------------|-------------------------------------|-------------------------------------|----------|
|                                        | $\Delta_0$                         | $\alpha_1$                   | $\alpha_2$               | $\Delta E_1$ / kJ mol <sup>-1</sup> | $\Delta E_2$ / kJ mol <sup>-1</sup> |          |
| $\lambda_{\text{em}} = 361 \text{ nm}$ |                                    |                              |                          |                                     |                                     |          |
| $\frac{A_{590}}{A_{\text{Ir}}}$        | 0.585<br>( $\pm 0.003$ )           | 22.874<br>( $\pm 2.472$ )    | 0                        | 5.865<br>( $\pm 0.197$ )            | 0                                   | 0.999    |
| $\frac{A_{617}}{A_{\text{Ir}}}$        | 4.960<br>( $\pm 0.034$ )           | 158.683<br>( $\pm 25.114$ )  | 0                        | 7.712<br>( $\pm 0.257$ )            | 0                                   | 0.999    |
| $\frac{A_{690}}{A_{\text{Ir}}}$        | 0.910<br>( $\pm 0.004$ )           | 49.889<br>( $\pm 3.849$ )    | 0                        | 6.399<br>( $\pm 0.132$ )            | 0                                   | 0.999    |
| $\frac{A_{617}}{A_{590}}$              | 8.447<br>( $\pm 0.076$ )           | 90.972<br>( $\pm 26.333$ )   | 0                        | 8.879<br>( $\pm 0.556$ )            | 0                                   | 0.999    |
| $\frac{A_{617}}{A_{690}}$              | 5.412<br>( $\pm 0.036$ )           | 329.016<br>( $\pm 137.559$ ) | 0                        | 13.015<br>( $\pm 0.871$ )           | 0                                   | 0.999    |
| $\lambda_{\text{em}} = 380 \text{ nm}$ |                                    |                              |                          |                                     |                                     |          |
| $\frac{A_{590}}{A_{\text{Ir}}}$        | 0.392<br>( $\pm 0.004$ )           | 25.702<br>( $\pm 13.130$ )   | 0                        | 8.489<br>( $\pm 1.060$ )            | 0                                   | 0.999    |
| $\frac{A_{617}}{A_{\text{Ir}}}$        | 2.809<br>( $\pm 0.015$ )           | 207.149<br>( $\pm 32.543$ )  | 0                        | 9.144<br>( $\pm 0.279$ )            | 0                                   | 0.999    |
| $\frac{A_{690}}{A_{\text{Ir}}}$        | 0.555<br>( $\pm 0.003$ )           | 89.573<br>( $\pm 12.544$ )   | 0                        | 8.430<br>( $\pm 0.262$ )            | 0                                   | 0.999    |
| $\frac{A_{617}}{A_{590}}$              | 7.525<br>( $\pm 0.051$ )           | 524.042<br>( $\pm 222.642$ ) | 1.125<br>( $\pm 0.347$ ) | 12.552<br>( $\pm 0.966$ )           | 2.127<br>( $\pm 0.339$ )            | 0.999    |
| $\frac{A_{617}}{A_{690}}$              | 5.038<br>( $\pm 0.033$ )           | 45.718<br>( $\pm 17.408$ )   | 0                        | 9.673<br>( $\pm 0.796$ )            | 0                                   | 0.999    |

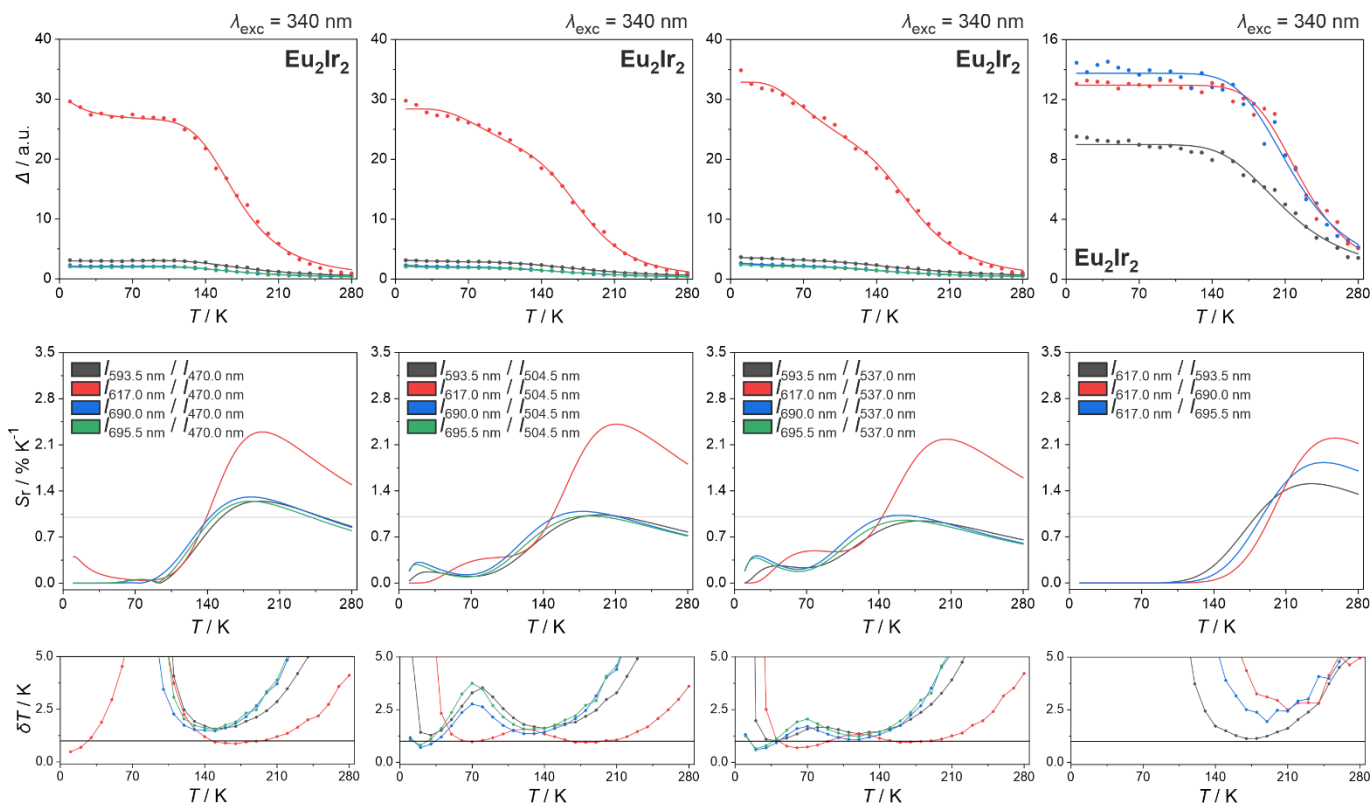

**Fig. S25** The full set of the characteristics of ratiometric optical thermometry based on temperature-variable emission spectra of  $\text{Eu}_2\text{Ir}_2$  (the 340 nm excitation, based on the spectra presented in Fig. S17), divided into four parts (columns) representing different types of applied intensity ratios. In each case, the set of data includes the temperature dependences of thermometric parameters defined as depicted in the figures (top part), the resulting temperature dependences of relative thermal sensitivity (middle part), and the related temperature uncertainties (bottom part). The experimental data in the top part (colored points) were fitted to the Mott-Seitz model (see the Comment on ratiometric optical thermometry studies above). The best-fit curves are shown as colored solid lines, while the resulting best-fit parameters are gathered in Table S18. The relative thermal sensitivity and temperature uncertainties were calculated based on the corresponding  $\Delta(T)$  dependences (see the Comment on ratiometric optical thermometry studies above).

**Table S18** Best-fit parameters to the Mott-Seitz model for the ratiometric luminescent thermometry based on the emission spectra of **Eu<sub>2</sub>Ir<sub>2</sub>** under the 340 nm excitation (see Fig. S25 for the related optical characteristics).

| $\Delta$                                            | Parameters of the Mott-Seitz model |                                  |                                   |                                   |                                   | $\chi^2$ |
|-----------------------------------------------------|------------------------------------|----------------------------------|-----------------------------------|-----------------------------------|-----------------------------------|----------|
|                                                     | $\Delta_0$                         | $\alpha_1$                       | $\alpha_2$                        | $\Delta E_1 / \text{kJ mol}^{-1}$ | $\Delta E_2 / \text{kJ mol}^{-1}$ |          |
| $\frac{I_{593.5 \text{ nm}}}{I_{470.0 \text{ nm}}}$ | 2.998<br>( $\pm 0.037$ )           | 79.808<br>( $\pm 20.275$ )       | -5.104<br>( $\pm 47.546$ )        | 6.332<br>( $\pm 2.782$ )          | 3.778<br>( $\pm 5.893$ )          | 0.999    |
| $\frac{I_{617.0 \text{ nm}}}{I_{470.0 \text{ nm}}}$ | 30.133<br>( $\pm 1.502$ )          | 1582.951<br>( $\pm 391.728$ )    | 0.165<br>( $\pm 0.045$ )          | 10.341<br>( $\pm 0.389$ )         | 0.180<br>( $\pm 0.139$ )          | 0.999    |
| $\frac{I_{690.0 \text{ nm}}}{I_{470.0 \text{ nm}}}$ | 2.117<br>( $\pm 0.028$ )           | 621.639<br>( $\pm 1711797.643$ ) | -539.575<br>( $\pm 1711852.824$ ) | 5.641<br>( $\pm 140.436$ )        | 5.543<br>( $\pm 149.836$ )        | 0.999    |
| $\frac{I_{695.5 \text{ nm}}}{I_{470.0 \text{ nm}}}$ | 1.961<br>( $\pm 0.026$ )           | 464.655<br>( $\pm 552858.577$ )  | -405.611<br>( $\pm 552892.713$ )  | 4.990<br>( $\pm 76.008$ )         | 4.868<br>( $\pm 79.282$ )         | 0.999    |
| $\frac{I_{593.5 \text{ nm}}}{I_{504.5 \text{ nm}}}$ | 3.111<br>( $\pm 0.048$ )           | 63.794<br>( $\pm 9.129$ )        | 0.189<br>( $\pm 0.049$ )          | 6.561<br>( $\pm 0.272$ )          | 0.484<br>( $\pm 0.208$ )          | 0.999    |
| $\frac{I_{617.0 \text{ nm}}}{I_{504.5 \text{ nm}}}$ | 28.404<br>( $\pm 0.283$ )          | 5050.374<br>( $\pm 2460.441$ )   | 1.933<br>( $\pm 0.586$ )          | 12.713<br>( $\pm 0.859$ )         | 1.879<br>( $\pm 0.285$ )          | 0.999    |
| $\frac{I_{690.0 \text{ nm}}}{I_{504.5 \text{ nm}}}$ | 2.279<br>( $\pm 0.071$ )           | 59.395<br>( $\pm 11.727$ )       | 0.243<br>( $\pm 0.059$ )          | 5.891<br>( $\pm 0.352$ )          | 0.333<br>( $\pm 0.183$ )          | 0.999    |
| $\frac{I_{695.5 \text{ nm}}}{I_{504.5 \text{ nm}}}$ | 2.093<br>( $\pm 0.076$ )           | 52.329<br>( $\pm 10.375$ )       | 0.185<br>( $\pm 0.050$ )          | 5.969<br>( $\pm 0.362$ )          | 0.290<br>( $\pm 0.214$ )          | 0.999    |
| $\frac{I_{593.5 \text{ nm}}}{I_{537.0 \text{ nm}}}$ | 3.561<br>( $\pm 0.059$ )           | 44.032<br>( $\pm 9.047$ )        | 0.454<br>( $\pm 0.159$ )          | 5.741<br>( $\pm 0.418$ )          | 0.738<br>( $\pm 0.250$ )          | 0.999    |
| $\frac{I_{617.0 \text{ nm}}}{I_{537.0 \text{ nm}}}$ | 32.866<br>( $\pm 0.400$ )          | 2695.763<br>( $\pm 1355.260$ )   | 2.003<br>( $\pm 0.472$ )          | 11.388<br>( $\pm 0.871$ )         | 1.509<br>( $\pm 0.206$ )          | 0.999    |
| $\frac{I_{690.0 \text{ nm}}}{I_{537.0 \text{ nm}}}$ | 2.638<br>( $\pm 0.074$ )           | 40.875<br>( $\pm 7.431$ )        | 0.363<br>( $\pm 0.082$ )          | 4.987<br>( $\pm 0.323$ )          | 0.376<br>( $\pm 0.151$ )          | 0.999    |
| $\frac{I_{695.5 \text{ nm}}}{I_{537.0 \text{ nm}}}$ | 2.424<br>( $\pm 0.071$ )           | 35.297<br>( $\pm 6.325$ )        | 0.309<br>( $\pm 0.072$ )          | 5.025<br>( $\pm 0.327$ )          | 0.351<br>( $\pm 0.160$ )          | 0.999    |
| $\frac{I_{617.0 \text{ nm}}}{I_{593.5 \text{ nm}}}$ | 8.986<br>( $\pm 0.093$ )           | 449.707<br>( $\pm 163.474$ )     | 0                                 | 10.815<br>( $\pm 0.662$ )         | 0                                 | 0.999    |
| $\frac{I_{617.0 \text{ nm}}}{I_{690.0 \text{ nm}}}$ | 12.960<br>( $\pm 0.118$ )          | 6045.303<br>( $\pm 3234.875$ )   | 0                                 | 16.413<br>( $\pm 1.026$ )         | 0                                 | 0.999    |
| $\frac{I_{617.0 \text{ nm}}}{I_{695.5 \text{ nm}}}$ | 13.752<br>( $\pm 0.155$ )          | 1504.578<br>( $\pm 765.160$ )    | 0                                 | 13.326<br>( $\pm 0.947$ )         | 0                                 | 0.999    |

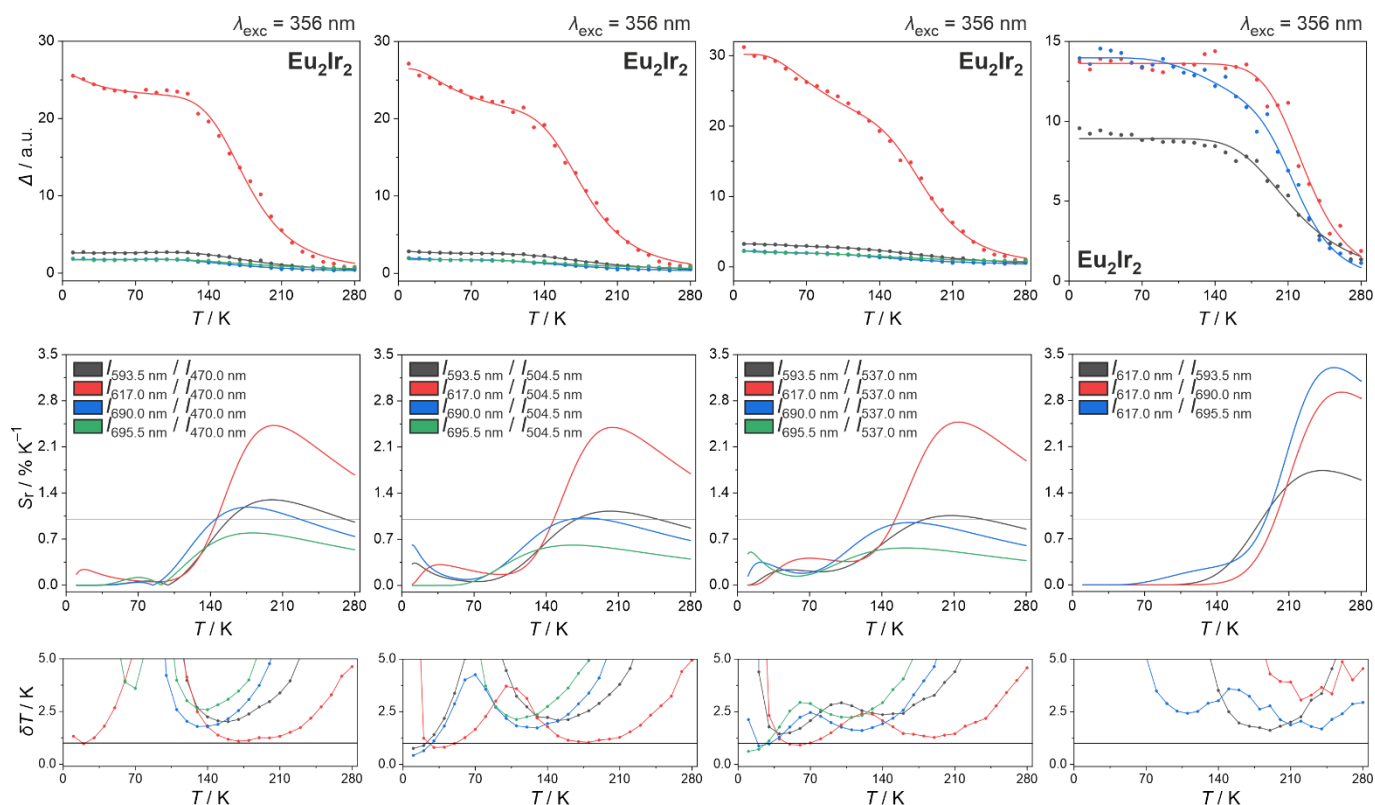

**Table S19** Best-fit parameters to the Mott-Seitz model for the ratiometric luminescent thermometry based on the emission spectra of **Eu<sub>2</sub>Ir<sub>2</sub>** under the 356 nm excitation (see Fig. S26 for the related optical characteristics).

| $\Delta$                                            | Parameters of the Mott-Seitz model |                                    |                                   |                                   |                                   | $\chi^2$ |
|-----------------------------------------------------|------------------------------------|------------------------------------|-----------------------------------|-----------------------------------|-----------------------------------|----------|
|                                                     | $\Delta_0$                         | $\alpha_1$                         | $\alpha_2$                        | $\Delta E_1 / \text{kJ mol}^{-1}$ | $\Delta E_2 / \text{kJ mol}^{-1}$ |          |
| $\frac{I_{593.5 \text{ nm}}}{I_{470.0 \text{ nm}}}$ | 2.619<br>( $\pm 0.034$ )           | 107.671<br>( $\pm 47.303$ )        | -1.372<br>( $\pm 6.689$ )         | 7.288<br>( $\pm 1.454$ )          | 2.969<br>( $\pm 3.854$ )          | 0.999    |
| $\frac{I_{617.0 \text{ nm}}}{I_{470.0 \text{ nm}}}$ | 25.652<br>( $\pm 0.884$ )          | 2701.136<br>( $\pm 996.581$ )      | 0.161<br>( $\pm 0.041$ )          | 11.543<br>( $\pm 0.591$ )         | 0.296<br>( $\pm 0.215$ )          | 0.999    |
| $\frac{I_{690.0 \text{ nm}}}{I_{470.0 \text{ nm}}}$ | 1.768<br>( $\pm 0.031$ )           | 473.794<br>( $\pm 1117368.576$ )   | -425.002<br>( $\pm 1117399.687$ ) | 4.731<br>( $\pm 109.600$ )        | 4.641<br>( $\pm 113.551$ )        | 0.999    |
| $\frac{I_{695.5 \text{ nm}}}{I_{470.0 \text{ nm}}}$ | 1.713<br>( $\pm 0.039$ )           | 225.439<br>( $\pm 377905.433$ )    | -209.372<br>( $\pm 377910.395$ )  | 3.652<br>( $\pm 62.072$ )         | 3.580<br>( $\pm 62.977$ )         | 0.999    |
| $\frac{I_{593.5 \text{ nm}}}{I_{504.5 \text{ nm}}}$ | 2.880<br>( $\pm 0.157$ )           | 93.652<br>( $\pm 21.291$ )         | 0.162<br>( $\pm 0.050$ )          | 7.206<br>( $\pm 0.419$ )          | 0.209<br>( $\pm 0.204$ )          | 0.999    |
| $\frac{I_{617.0 \text{ nm}}}{I_{504.5 \text{ nm}}}$ | 26.458<br>( $\pm 0.421$ )          | 3224.793<br>( $\pm 1103.008$ )     | 0.483<br>( $\pm 0.074$ )          | 11.776<br>( $\pm 0.561$ )         | 0.650<br>( $\pm 0.139$ )          | 0.999    |
| $\frac{I_{690.0 \text{ nm}}}{I_{504.5 \text{ nm}}}$ | 2.048<br>( $\pm 0.224$ )           | 50.042<br>( $\pm 12.975$ )         | 0.240<br>( $\pm 0.100$ )          | 5.660<br>( $\pm 0.463$ )          | 0.170<br>( $\pm 0.207$ )          | 0.999    |
| $\frac{I_{695.5 \text{ nm}}}{I_{504.5 \text{ nm}}}$ | 1.763<br>( $\pm 0.049$ )           | 63.523<br>( $\pm 390470.312$ )     | -53.681<br>( $\pm 390479.530$ )   | 3.643<br>( $\pm 235.303$ )        | 3.569<br>( $\pm 259.647$ )        | 0.999    |
| $\frac{I_{593.5 \text{ nm}}}{I_{537.0 \text{ nm}}}$ | 3.248<br>( $\pm 0.042$ )           | 92.597<br>( $\pm 20.836$ )         | 0.481<br>( $\pm 0.136$ )          | 7.380<br>( $\pm 0.456$ )          | 0.876<br>( $\pm 0.233$ )          | 0.999    |
| $\frac{I_{617.0 \text{ nm}}}{I_{537.0 \text{ nm}}}$ | 30.197<br>( $\pm 0.335$ )          | 6631.072<br>( $\pm 3049.704$ )     | 1.404<br>( $\pm 0.249$ )          | 13.242<br>( $\pm 0.796$ )         | 1.327<br>( $\pm 0.166$ )          | 0.999    |
| $\frac{I_{690.0 \text{ nm}}}{I_{537.0 \text{ nm}}}$ | 2.295<br>( $\pm 0.068$ )           | 36.255<br>( $\pm 7.354$ )          | 0.314<br>( $\pm 0.087$ )          | 5.132<br>( $\pm 0.375$ )          | 0.391<br>( $\pm 0.191$ )          | 0.999    |
| $\frac{I_{695.5 \text{ nm}}}{I_{537.0 \text{ nm}}}$ | 2.294<br>( $\pm 0.181$ )           | 10.402<br>( $\pm 2.586$ )          | 0.253<br>( $\pm 0.081$ )          | 4.044<br>( $\pm 0.525$ )          | 0.219<br>( $\pm 0.232$ )          | 0.999    |
| $\frac{I_{617.0 \text{ nm}}}{I_{593.5 \text{ nm}}}$ | 8.916<br>( $\pm 0.090$ )           | 1049.507<br>( $\pm 444.735$ )      | 0                                 | 12.523<br>( $\pm 0.782$ )         | 0                                 | 0.999    |
| $\frac{I_{617.0 \text{ nm}}}{I_{690.0 \text{ nm}}}$ | 13.619<br>( $\pm 0.164$ )          | 74074.049<br>( $\pm 616837.494$ )  | 379.493<br>( $\pm 30065.134$ )    | 21.575<br>( $\pm 29.506$ )        | 14.234<br>( $\pm 94.415$ )        | 0.999    |
| $\frac{I_{617.0 \text{ nm}}}{I_{695.5 \text{ nm}}}$ | 13.970<br>( $\pm 0.176$ )          | 207419.808<br>( $\pm 297312.832$ ) | 3.614<br>( $\pm 3.583$ )          | 22.183<br>( $\pm 2.891$ )         | 3.909<br>( $\pm 1.263$ )          | 0.999    |



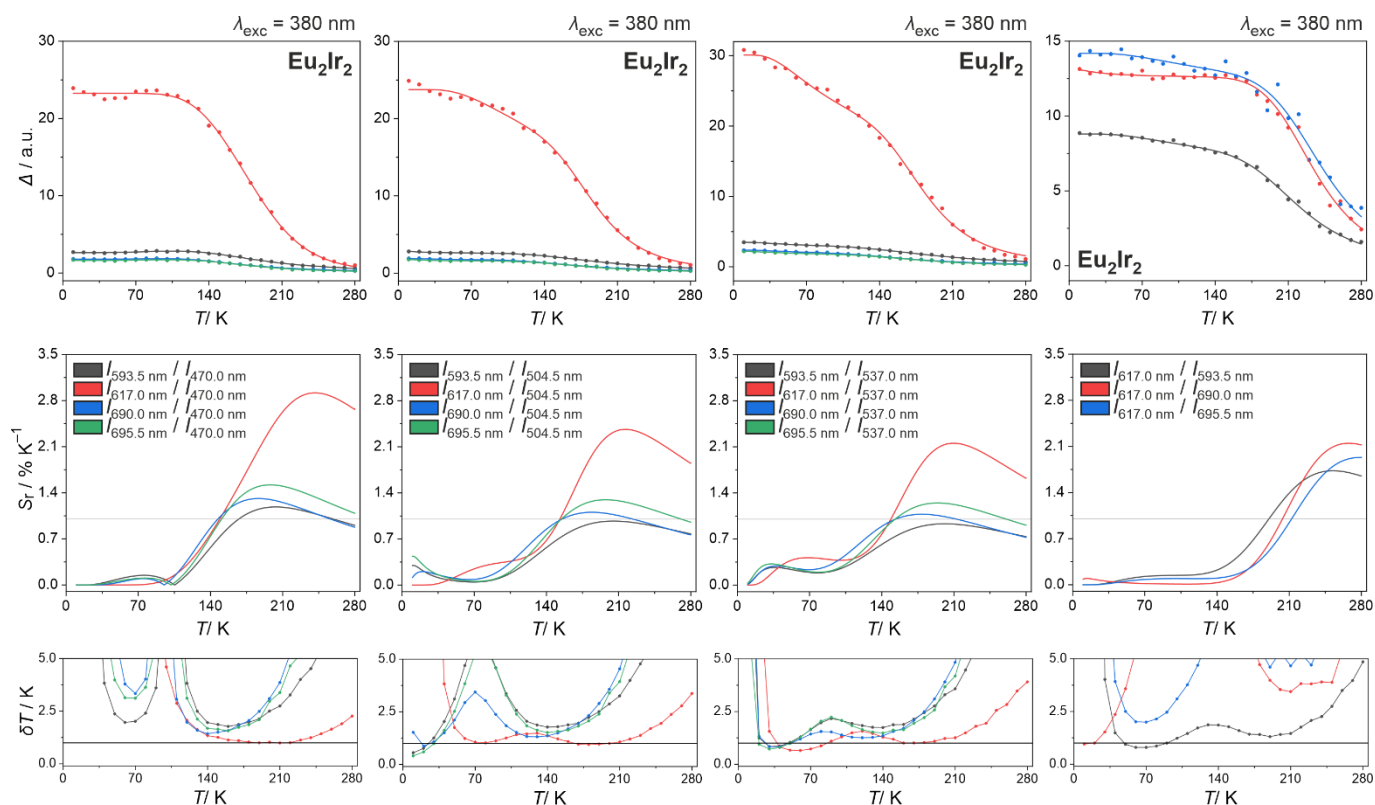

**Fig. S27** The full set of the characteristics of ratiometric optical thermometry based on temperature-variable emission spectra of  $\text{Eu}_2\text{Ir}_2$  (the 380 nm excitation, based on the spectra presented in Fig. S17), divided into four parts (columns) representing different types of applied intensity ratios. In each case, the set of data includes the temperature dependences of thermometric parameters defined as depicted in the figures (top part), the resulting temperature dependences of relative thermal sensitivity (middle part), and the related temperature uncertainties (bottom part). The experimental data in the top part (colored points) were fitted to the Mott-Seitz model (see the Comment on ratiometric optical thermometry studies above). The best-fit curves are shown as colored solid lines, while the resulting best-fit parameters are gathered in Table S20. The relative thermal sensitivity and temperature uncertainties were calculated based on the corresponding  $\Delta(T)$  dependences (see the Comment on ratiometric optical thermometry studies above).

**Table S20** Best-fit parameters to the Mott-Seitz model for the ratiometric luminescent thermometry based on the emission spectra of **Eu<sub>2</sub>Ir<sub>2</sub>** under the 380 nm excitation (see Fig. S27 for the related optical characteristics).

| $\Delta$                                            | Parameters of the Mott-Seitz model |                                    |                                |                                   |                                   | $\chi^2$ |
|-----------------------------------------------------|------------------------------------|------------------------------------|--------------------------------|-----------------------------------|-----------------------------------|----------|
|                                                     | $\Delta_0$                         | $\alpha_1$                         | $\alpha_2$                     | $\Delta E_1 / \text{kJ mol}^{-1}$ | $\Delta E_2 / \text{kJ mol}^{-1}$ |          |
| $\frac{I_{593.5 \text{ nm}}}{I_{470.0 \text{ nm}}}$ | 2.631<br>( $\pm 0.028$ )           | 78.592<br>( $\pm 17.250$ )         | -0.653<br>( $\pm 0.568$ )      | 7.160<br>( $\pm 0.533$ )          | 1.716<br>( $\pm 0.729$ )          | 0.999    |
| $\frac{I_{617.0 \text{ nm}}}{I_{470.0 \text{ nm}}}$ | 23.254<br>( $\pm 0.119$ )          | 153117.710<br>( $\pm 273641.032$ ) | 191.355<br>( $\pm 150.326$ )   | 20.649<br>( $\pm 3.880$ )         | 8.143<br>( $\pm 0.941$ )          | 0.999    |
| $\frac{I_{690.0 \text{ nm}}}{I_{470.0 \text{ nm}}}$ | 1.790<br>( $\pm 0.021$ )           | -1.504<br>( $\pm 4.521$ )          | 85.156<br>( $\pm 25.993$ )     | 2.601<br>( $\pm 2.213$ )          | 6.522<br>( $\pm 1.014$ )          | 0.999    |
| $\frac{I_{695.5 \text{ nm}}}{I_{470.0 \text{ nm}}}$ | 1.630<br>( $\pm 0.025$ )           | -0.524<br>( $\pm 0.921$ )          | 190.846<br>( $\pm 68.364$ )    | 1.821<br>( $\pm 1.511$ )          | 8.074<br>( $\pm 0.767$ )          | 0.999    |
| $\frac{I_{593.5 \text{ nm}}}{I_{504.5 \text{ nm}}}$ | 2.856<br>( $\pm 0.105$ )           | 60.027<br>( $\pm 7.483$ )          | 0.126<br>( $\pm 0.032$ )       | 6.823<br>( $\pm 0.238$ )          | 0.187<br>( $\pm 0.145$ )          | 0.999    |
| $\frac{I_{617.0 \text{ nm}}}{I_{504.5 \text{ nm}}}$ | 23.765<br>( $\pm 0.225$ )          | 5114.209<br>( $\pm 2590.357$ )     | 2.073<br>( $\pm 0.798$ )       | 13.151<br>( $\pm 0.928$ )         | 2.192<br>( $\pm 0.377$ )          | 0.999    |
| $\frac{I_{690.0 \text{ nm}}}{I_{504.5 \text{ nm}}}$ | 1.911<br>( $\pm 0.049$ )           | 64.646<br>( $\pm 10.701$ )         | 0.156<br>( $\pm 0.045$ )       | 6.208<br>( $\pm 0.298$ )          | 0.335<br>( $\pm 0.226$ )          | 0.999    |
| $\frac{I_{695.5 \text{ nm}}}{I_{504.5 \text{ nm}}}$ | 1.808<br>( $\pm 0.117$ )           | 141.950<br>( $\pm 31.408$ )        | 0.181<br>( $\pm 0.059$ )       | 7.506<br>( $\pm 0.392$ )          | 0.182<br>( $\pm 0.173$ )          | 0.999    |
| $\frac{I_{593.5 \text{ nm}}}{I_{537.0 \text{ nm}}}$ | 3.480<br>( $\pm 0.044$ )           | 57.107<br>( $\pm 9.279$ )          | 0.398<br>( $\pm 0.073$ )       | 6.613<br>( $\pm 0.326$ )          | 6.613<br>( $\pm 0.326$ )          | 0.999    |
| $\frac{I_{617.0 \text{ nm}}}{I_{537.0 \text{ nm}}}$ | 30.097<br>( $\pm 0.328$ )          | 2542.574<br>( $\pm 992.214$ )      | 1.396<br>( $\pm 0.257$ )       | 11.591<br>( $\pm 0.681$ )         | 11.591<br>( $\pm 0.681$ )         | 0.999    |
| $\frac{I_{690.0 \text{ nm}}}{I_{537.0 \text{ nm}}}$ | 2.364<br>( $\pm 0.038$ )           | 63.061<br>( $\pm 12.017$ )         | 0.459<br>( $\pm 0.126$ )       | 5.998<br>( $\pm 0.363$ )          | 5.998<br>( $\pm 0.363$ )          | 0.999    |
| $\frac{I_{695.5 \text{ nm}}}{I_{537.0 \text{ nm}}}$ | 2.177<br>( $\pm 0.041$ )           | 131.869<br>( $\pm 30.743$ )        | 0.436<br>( $\pm 0.091$ )       | 7.255<br>( $\pm 0.424$ )          | 7.255<br>( $\pm 0.424$ )          | 0.999    |
| $\frac{I_{617.0 \text{ nm}}}{I_{593.5 \text{ nm}}}$ | 8.798<br>( $\pm 0.068$ )           | 1588.237<br>( $\pm 510.715$ )      | 0.557<br>( $\pm 0.192$ )       | 13.507<br>( $\pm 0.666$ )         | 1.670<br>( $\pm 0.380$ )          | 0.999    |
| $\frac{I_{617.0 \text{ nm}}}{I_{690.0 \text{ nm}}}$ | 13.132<br>( $\pm 0.531$ )          | 0.050<br>( $\pm 0.036$ )           | 6985.147<br>( $\pm 3202.734$ ) | 0.233<br>( $\pm 0.488$ )          | 17.260<br>( $\pm 0.925$ )         | 0.999    |
| $\frac{I_{617.0 \text{ nm}}}{I_{695.5 \text{ nm}}}$ | 14.196<br>( $\pm 0.276$ )          | 0.370<br>( $\pm 0.364$ )           | 5084.506<br>( $\pm 5409.476$ ) | 1.708<br>( $\pm 1.232$ )          | 17.190<br>( $\pm 2.289$ )         | 0.999    |

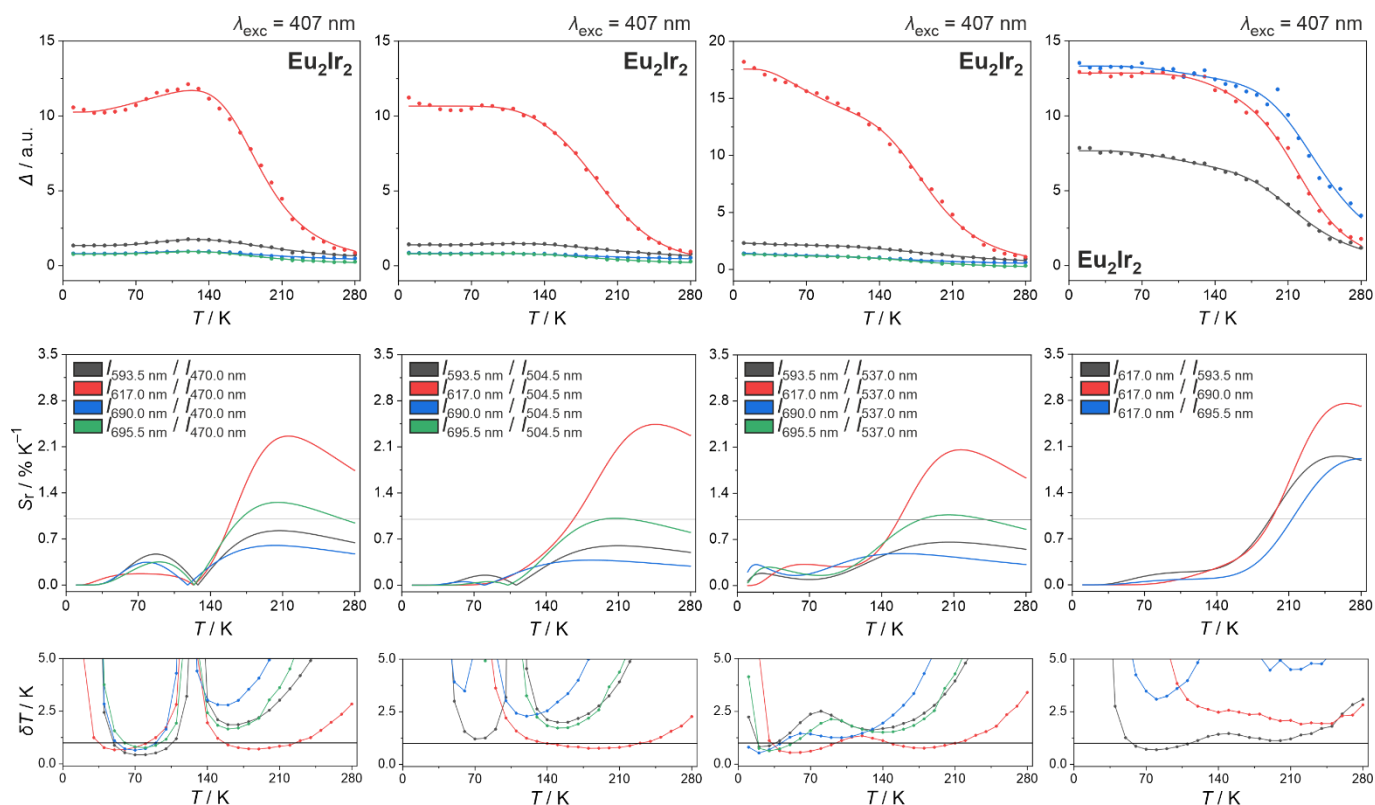

**Fig. S28** The full set of the characteristics of ratiometric optical thermometry based on temperature-variable emission spectra of  $\text{Eu}_2\text{Ir}_2$  (the 407 nm excitation, based on the spectra presented in Fig. S17), divided into four parts (columns) representing different types of applied intensity ratios. In each case, the set of data includes the temperature dependences of thermometric parameters defined as depicted in the figures (top part), the resulting temperature dependences of relative thermal sensitivity (middle part), and the related temperature uncertainties (bottom part). The experimental data in the top part (colored points) were fitted to the Mott-Seitz model (see the Comment on ratiometric optical thermometry studies above). The best-fit curves are shown as colored solid lines, while the resulting best-fit parameters are gathered in Table S21. The relative thermal sensitivity and temperature uncertainties were calculated based on the corresponding  $\Delta(T)$  dependences (see the Comment on ratiometric optical thermometry studies above).

**Table S21** Best-fit parameters to the Mott-Seitz model for the ratiometric luminescent thermometry based on the emission spectra of **Eu<sub>2</sub>Ir<sub>2</sub>** under the 407 nm excitation (see Fig. S28 for the related optical characteristics).

| $\Delta$                                            | Parameters of the Mott-Seitz model |                                  |                                  |                                   |                                   | $\chi^2$ |
|-----------------------------------------------------|------------------------------------|----------------------------------|----------------------------------|-----------------------------------|-----------------------------------|----------|
|                                                     | $\Delta_0$                         | $\alpha_1$                       | $\alpha_2$                       | $\Delta E_1 / \text{kJ mol}^{-1}$ | $\Delta E_2 / \text{kJ mol}^{-1}$ |          |
| $\frac{I_{593.5 \text{ nm}}}{I_{470.0 \text{ nm}}}$ | 1.348<br>( $\pm 0.022$ )           | 22.428<br>( $\pm 16.083$ )       | -7.370<br>( $\pm 19.940$ )       | 4.384<br>( $\pm 1.709$ )          | 2.678<br>( $\pm 1.386$ )          | 0.999    |
| $\frac{I_{617.0 \text{ nm}}}{I_{470.0 \text{ nm}}}$ | 10.261<br>( $\pm 0.161$ )          | 1858.638<br>( $\pm 624.546$ )    | -0.408<br>( $\pm 0.146$ )        | 12.220<br>( $\pm 0.608$ )         | 1.128<br>( $\pm 0.379$ )          | 0.999    |
| $\frac{I_{690.0 \text{ nm}}}{I_{470.0 \text{ nm}}}$ | 0.797<br>( $\pm 0.018$ )           | 168.663<br>( $\pm 103022.521$ )  | -160.606<br>( $\pm 103023.456$ ) | 3.119<br>( $\pm 22.061$ )         | 3.048<br>( $\pm 21.998$ )         | 0.999    |
| $\frac{I_{695.5 \text{ nm}}}{I_{470.0 \text{ nm}}}$ | 0.775<br>( $\pm 0.011$ )           | -2.576<br>( $\pm 2.320$ )        | 69.136<br>( $\pm 19.826$ )       | 2.347<br>( $\pm 0.734$ )          | 6.848<br>( $\pm 0.904$ )          | 0.999    |
| $\frac{I_{593.5 \text{ nm}}}{I_{504.5 \text{ nm}}}$ | 1.394<br>( $\pm 0.019$ )           | -118.233<br>( $\pm 94118.225$ )  | 129.289<br>( $\pm 94113.789$ )   | 3.670<br>( $\pm 41.783$ )         | 3.780<br>( $\pm 41.647$ )         | 0.999    |
| $\frac{I_{617.0 \text{ nm}}}{I_{504.5 \text{ nm}}}$ | 10.661<br>( $\pm 0.063$ )          | 23357.230<br>( $\pm 29260.433$ ) | 40.809<br>( $\pm 42.762$ )       | 17.879<br>( $\pm 2.860$ )         | 6.703<br>( $\pm 1.239$ )          | 0.999    |
| $\frac{I_{690.0 \text{ nm}}}{I_{504.5 \text{ nm}}}$ | 0.828<br>( $\pm 0.017$ )           | 62.853<br>( $\pm 126767.491$ )   | -58.492<br>( $\pm 126768.810$ )  | 2.971<br>( $\pm 64.053$ )         | 2.909<br>( $\pm 65.221$ )         | 0.999    |
| $\frac{I_{695.5 \text{ nm}}}{I_{504.5 \text{ nm}}}$ | 0.800<br>( $\pm 0.010$ )           | 478.064<br>( $\pm 676079.729$ )  | -430.522<br>( $\pm 676104.110$ ) | 5.437<br>( $\pm 78.377$ )         | 5.331<br>( $\pm 80.375$ )         | 0.999    |
| $\frac{I_{593.5 \text{ nm}}}{I_{537.0 \text{ nm}}}$ | 2.311<br>( $\pm 0.052$ )           | 21.983<br>( $\pm 4.288$ )        | 0.170<br>( $\pm 0.052$ )         | 5.808<br>( $\pm 0.412$ )          | 0.407<br>( $\pm 0.247$ )          | 0.999    |
| $\frac{I_{617.0 \text{ nm}}}{I_{537.0 \text{ nm}}}$ | 17.567<br>( $\pm 0.192$ )          | 2147.502<br>( $\pm 749.888$ )    | 0.954<br>( $\pm 0.184$ )         | 11.835<br>( $\pm 0.626$ )         | 1.197<br>( $\pm 0.180$ )          | 0.999    |
| $\frac{I_{690.0 \text{ nm}}}{I_{537.0 \text{ nm}}}$ | 1.417<br>( $\pm 0.059$ )           | 7.233<br>( $\pm 1.552$ )         | 0.226<br>( $\pm 0.087$ )         | 3.778<br>( $\pm 0.489$ )          | 0.312<br>( $\pm 0.260$ )          | 0.999    |
| $\frac{I_{695.5 \text{ nm}}}{I_{537.0 \text{ nm}}}$ | 1.348<br>( $\pm 0.025$ )           | 91.889<br>( $\pm 20.139$ )       | 0.342<br>( $\pm 0.070$ )         | 7.258<br>( $\pm 0.419$ )          | 0.528<br>( $\pm 0.168$ )          | 0.999    |
| $\frac{I_{617.0 \text{ nm}}}{I_{593.5 \text{ nm}}}$ | 7.661<br>( $\pm 0.058$ )           | 3945.404<br>( $\pm 1729.221$ )   | 1.059<br>( $\pm 0.371$ )         | 15.299<br>( $\pm 0.916$ )         | 2.183<br>( $\pm 0.403$ )          | 0.999    |
| $\frac{I_{617.0 \text{ nm}}}{I_{690.0 \text{ nm}}}$ | 12.858<br>( $\pm 0.089$ )          | 10.662<br>( $\pm 11.050$ )       | 72582.659<br>( $\pm 83637.435$ ) | 5.772<br>( $\pm 1.362$ )          | 21.292<br>( $\pm 2.551$ )         | 0.999    |
| $\frac{I_{617.0 \text{ nm}}}{I_{695.5 \text{ nm}}}$ | 13.332<br>( $\pm 0.178$ )          | 4896.490<br>( $\pm 4488.315$ )   | 0.482<br>( $\pm 0.588$ )         | 17.221<br>( $\pm 2.018$ )         | 2.346<br>( $\pm 1.540$ )          | 0.999    |

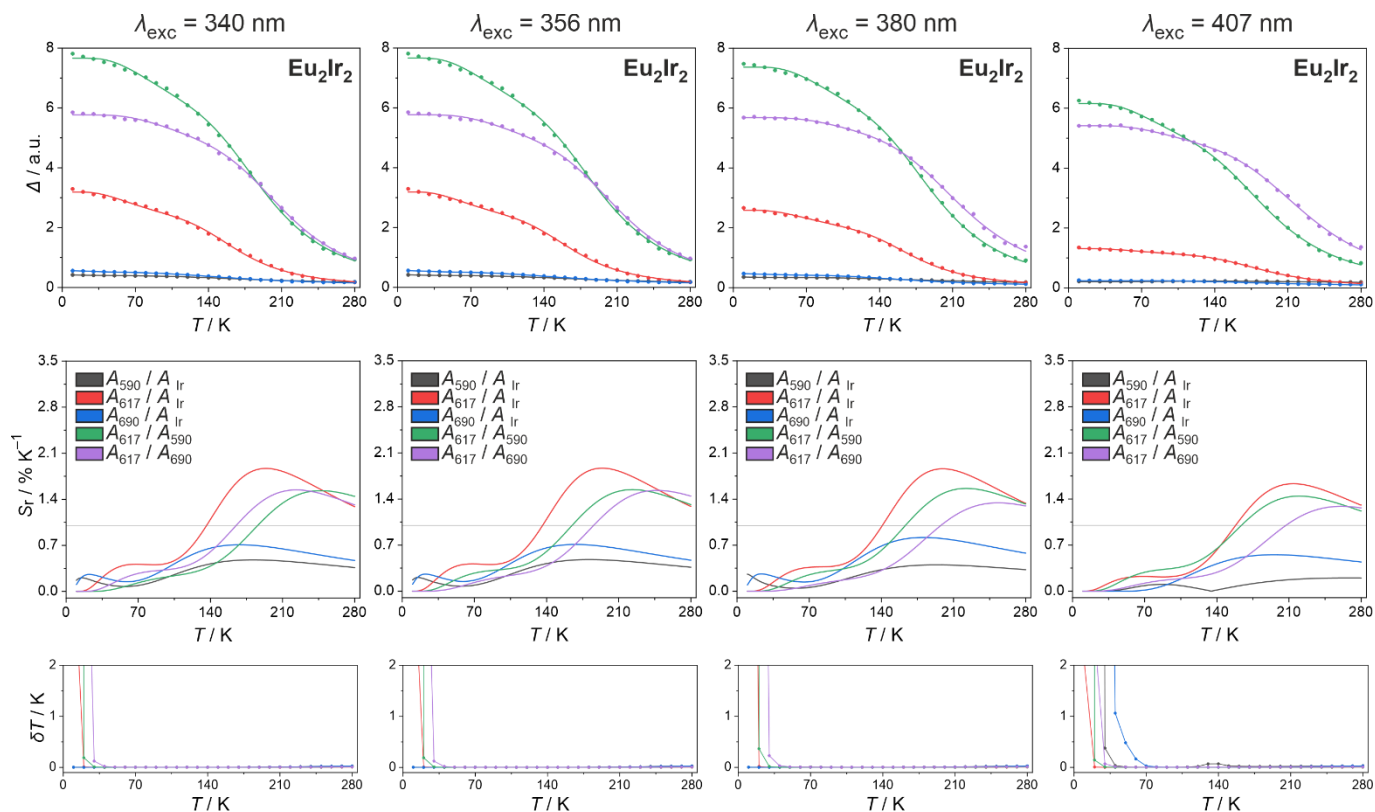

**Fig. S29** The full set of the characteristics of ratiometric optical thermometry based on temperature-variable emission spectra of  $\text{Eu}_2\text{Ir}_2$  using the ratios between the integrated areas of the indicated emission peaks (the maxima are indicated for the case of Eu(III)-based emission while the “Ir” stands for the broadband emission of Ir(III) complexes, the respective emission spectra are shown in Fig. S17) instead of the ratios between the intensities for the selected emission maxima (as was used in optical thermometry presented in Fig. S25–S28). The set of characteristics for four different indicated excitation wavelengths are presented. In each case, the set of data includes the temperature dependences of thermometric parameters defined as depicted in the figures (top part), the resulting temperature dependences of relative thermal sensitivity (middle part), and the related temperature uncertainties (bottom part). The experimental data in the top part (colored points) were fitted to the Mott-Seitz model (see the Comment on ratiometric optical thermometry studies above). The best-fit curves are shown as colored solid lines, while the resulting best-fit parameters are gathered in Table S22. The relative thermal sensitivity and temperature uncertainties were calculated based on the corresponding  $\Delta(T)$  dependences (see the Comment on ratiometric optical thermometry studies above).

**Table S22** Best-fit parameters to the Mott-Seitz model for the ratiometric luminescent thermometry based on the emission spectra of **Eu<sub>2</sub>Ir<sub>2</sub>** under the 340, 356, 308, and 407 nm excitation using the ratios between the integrated areas of the indicated emission peaks (the maxima are indicated for the case of Eu(III)-based emission while the “Ir” stands for the broadband emission of Ir(III) complexes, see Fig. S29 for the related optical characteristics).

| $\Delta$                               | Parameter of the Mott-Seitz model |                                |                                 |                                     |                                     | $\chi^2$ |
|----------------------------------------|-----------------------------------|--------------------------------|---------------------------------|-------------------------------------|-------------------------------------|----------|
|                                        | $\Delta_0$                        | $\alpha_1$                     | $\alpha_2$                      | $\Delta E_1$ / kJ mol <sup>-1</sup> | $\Delta E_2$ / kJ mol <sup>-1</sup> |          |
| $\lambda_{\text{em}} = 340 \text{ nm}$ |                                   |                                |                                 |                                     |                                     |          |
| $\frac{A_{590}}{A_{\text{Ir}}}$        | 0.424<br>( $\pm 0.007$ )          | 8.442<br>( $\pm 0.614$ )       | 0.121<br>( $\pm 0.019$ )        | 4.379<br>( $\pm 0.161$ )            | 0.258<br>( $\pm 0.120$ )            | 0.999    |
| $\frac{A_{617}}{A_{\text{Ir}}}$        | 3.191<br>( $\pm 0.027$ )          | 809.894<br>( $\pm 201.861$ )   | 1.351<br>( $\pm 0.242$ )        | 9.333<br>( $\pm 0.432$ )            | 1.271<br>( $\pm 0.146$ )            | 0.999    |
| $\frac{A_{690}}{A_{\text{Ir}}}$        | 0.564<br>( $\pm 0.010$ )          | 17.015<br>( $\pm 1.850$ )      | 0.228<br>( $\pm 0.049$ )        | 4.555<br>( $\pm 0.223$ )            | 0.385<br>( $\pm 0.146$ )            | 0.999    |
| $\frac{A_{617}}{A_{590}}$              | 7.663<br>( $\pm 0.037$ )          | 618.916<br>( $\pm 117.415$ )   | 1.479<br>( $\pm 0.250$ )        | 10.477<br>( $\pm 0.384$ )           | 1.815<br>( $\pm 0.158$ )            | 0.999    |
| $\frac{A_{617}}{A_{690}}$              | 5.769<br>( $\pm 0.023$ )          | 901.791<br>( $\pm 209.325$ )   | 1.627<br>( $\pm 0.405$ )        | 12.284<br>( $\pm 0.509$ )           | 2.511<br>( $\pm 0.262$ )            | 0.999    |
| $\lambda_{\text{em}} = 356 \text{ nm}$ |                                   |                                |                                 |                                     |                                     |          |
| $\frac{A_{590}}{A_{\text{Ir}}}$        | 0.424<br>( $\pm 0.007$ )          | 8.442<br>( $\pm 0.614$ )       | 0.121<br>( $\pm 0.019$ )        | 4.379<br>( $\pm 0.161$ )            | 0.258<br>( $\pm 0.120$ )            | 0.999    |
| $\frac{A_{617}}{A_{\text{Ir}}}$        | 3.191<br>( $\pm 0.027$ )          | 809.894<br>( $\pm 201.861$ )   | 1.351<br>( $\pm 0.242$ )        | 9.333<br>( $\pm 0.432$ )            | 1.271<br>( $\pm 0.146$ )            | 0.999    |
| $\frac{A_{690}}{A_{\text{Ir}}}$        | 0.564<br>( $\pm 0.010$ )          | 17.015<br>( $\pm 1.850$ )      | 0.228<br>( $\pm 0.049$ )        | 4.555<br>( $\pm 0.223$ )            | 0.385<br>( $\pm 0.146$ )            | 0.999    |
| $\frac{A_{617}}{A_{590}}$              | 7.663<br>( $\pm 0.037$ )          | 618.916<br>( $\pm 117.415$ )   | 1.479<br>( $\pm 0.250$ )        | 10.477<br>( $\pm 0.384$ )           | 1.815<br>( $\pm 0.158$ )            | 0.999    |
| $\frac{A_{617}}{A_{690}}$              | 5.769<br>( $\pm 0.023$ )          | 901.791<br>( $\pm 209.325$ )   | 1.627<br>( $\pm 0.405$ )        | 12.284<br>( $\pm 0.509$ )           | 2.511<br>( $\pm 0.262$ )            | 0.999    |
| $\lambda_{\text{em}} = 380 \text{ nm}$ |                                   |                                |                                 |                                     |                                     |          |
| $\frac{A_{590}}{A_{\text{Ir}}}$        | 0.362<br>( $\pm 0.010$ )          | 6.746<br>( $\pm 0.466$ )       | 0.095<br>( $\pm 0.022$ )        | 4.496<br>( $\pm 0.158$ )            | 0.163<br>( $\pm 0.117$ )            | 0.999    |
| $\frac{A_{617}}{A_{\text{Ir}}}$        | 2.587<br>( $\pm 0.020$ )          | 876.023<br>( $\pm 211.509$ )   | 1.344<br>( $\pm 0.266$ )        | 9.744<br>( $\pm 0.431$ )            | 1.432<br>( $\pm 0.168$ )            | 0.999    |
| $\frac{A_{690}}{A_{\text{Ir}}}$        | 0.469<br>( $\pm 0.006$ )          | 28.268<br>( $\pm 2.589$ )      | 0.243<br>( $\pm 0.035$ )        | 5.305<br>( $\pm 0.180$ )            | 0.403<br>( $\pm 0.104$ )            | 0.999    |
| $\frac{A_{617}}{A_{590}}$              | 7.371<br>( $\pm 0.028$ )          | 639.621<br>( $\pm 103.940$ )   | 1.605<br>( $\pm 0.258$ )        | 10.509<br>( $\pm 0.332$ )           | 1.969<br>( $\pm 0.151$ )            | 0.999    |
| $\frac{A_{617}}{A_{690}}$              | 5.679<br>( $\pm 0.024$ )          | 506.152<br>( $\pm 131.583$ )   | 1.262<br>( $\pm 0.497$ )        | 11.741<br>( $\pm 0.602$ )           | 2.642<br>( $\pm 0.417$ )            | 0.999    |
| $\lambda_{\text{em}} = 407 \text{ nm}$ |                                   |                                |                                 |                                     |                                     |          |
| $\frac{A_{590}}{A_{\text{Ir}}}$        | 0.210<br>( $\pm 0.001$ )          | 48.747<br>( $\pm 29298.661$ )  | -46.268<br>( $\pm 29299.172$ )  | 3.441<br>( $\pm 27.031$ )           | 3.354<br>( $\pm 26.756$ )           | 0.999    |
| $\frac{A_{617}}{A_{\text{Ir}}}$        | 1.313<br>( $\pm 0.008$ )          | 562.531<br>( $\pm 88.575$ )    | 0.644<br>( $\pm 0.109$ )        | 9.946<br>( $\pm 0.297$ )            | 1.209<br>( $\pm 0.153$ )            | 0.999    |
| $\frac{A_{690}}{A_{\text{Ir}}}$        | 0.236<br>( $\pm 0.003$ )          | 85.474<br>( $\pm 249594.059$ ) | -74.206<br>( $\pm 249598.552$ ) | 4.417<br>( $\pm 109.040$ )          | 4.344<br>( $\pm 117.940$ )          | 0.999    |
| $\frac{A_{617}}{A_{590}}$              | 6.159<br>( $\pm 0.024$ )          | 437.770<br>( $\pm 65.853$ )    | 1.517<br>( $\pm 0.215$ )        | 9.855<br>( $\pm 0.308$ )            | 1.795<br>( $\pm 0.129$ )            | 0.999    |
| $\frac{A_{617}}{A_{690}}$              | 5.419<br>( $\pm 0.019$ )          | 487.155<br>( $\pm 96.152$ )    | 1.052<br>( $\pm 0.224$ )        | 11.955<br>( $\pm 0.448$ )           | 2.239<br>( $\pm 0.228$ )            | 0.999    |

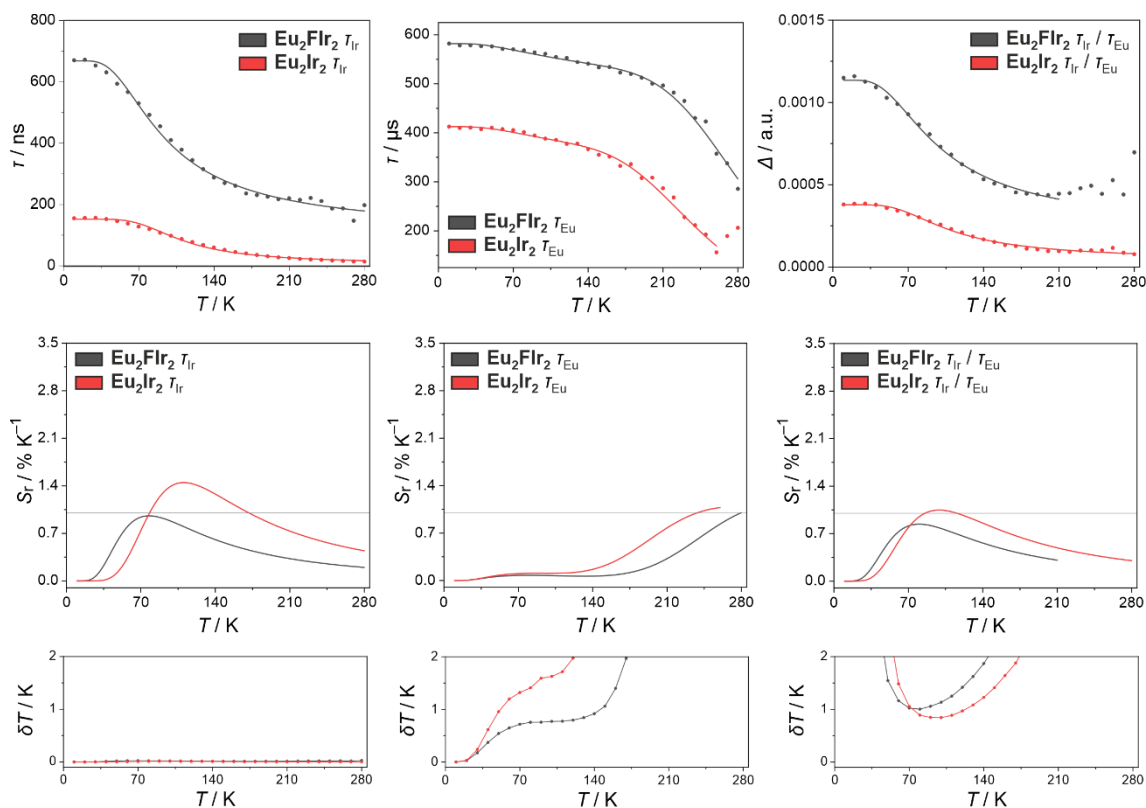

**Fig. S30** The full set of the characteristics of optical thermometry based on temperature-variable emission lifetimes in  $\text{Eu}_2\text{Flr}_2$  and  $\text{Eu}_2\text{Ir}_2$ , including the emission lifetime for the Ir(III)-based emission (left column; the 374 nm excitation and the 460 nm emission, as shown in Fig. S16 for  $\text{Eu}_2\text{Flr}_2$ ; the 374 nm excitation and the 470 nm emission, as shown in Fig. S20 for  $\text{Eu}_2\text{Ir}_2$ ), the emission lifetime for the Eu(III)-based emission (middle column; the 361 nm excitation and the 617 nm emission, as shown in Fig. S15 for  $\text{Eu}_2\text{Flr}_2$ ; the 356 nm excitation and the 617 nm emission, as shown in Fig. S19 for  $\text{Eu}_2\text{Ir}_2$ ), and the ratio between the mentioned emission lifetimes (right column). In each case, the set of data includes the temperature dependences of thermometric parameters defined as depicted in the figures (top part), the resulting temperature dependences of relative thermal sensitivity (middle part), and the related temperature uncertainties (bottom part). The experimental data in the top part (colored points) were fitted to the Mott-Seitz model (see the Comment on ratiometric optical thermometry studies above). The best-fit curves are shown as colored solid lines, while the resulting best-fit parameters are gathered in Table S23. The relative thermal sensitivity and temperature uncertainties were calculated based on the corresponding  $\Delta(T)$  dependences (see the Comment on ratiometric optical thermometry studies above).



**Table S23** Best-fit parameters to the Mott-Seitz model for the luminescent thermometry based on the emission lifetimes of **Eu<sub>2</sub>Flr<sub>2</sub>** and **Eu<sub>2</sub>Ir<sub>2</sub>**, including the emission lifetime of the Ir(III)-based emission ( $\tau_{Ir}$ ), the emission lifetime of the Eu(III)-based emission ( $\tau_{Eu}$ ), and their ratio (see Fig. S30 for the related optical characteristics).

| Compound and $\Delta$                                                 | Parameters of the Mott-Seitz model |                              |                          |                                   |                                   | $\chi^2$ |
|-----------------------------------------------------------------------|------------------------------------|------------------------------|--------------------------|-----------------------------------|-----------------------------------|----------|
|                                                                       | $\Delta_0$                         | $\alpha_1$                   | $\alpha_2$               | $\Delta E_1 / \text{kJ mol}^{-1}$ | $\Delta E_2 / \text{kJ mol}^{-1}$ |          |
| <b>Eu<sub>2</sub>Flr<sub>2</sub></b><br>$\tau_{Ir}$                   | 667.222<br>( $\pm 6.531$ ) [ns]    | 5.802<br>( $\pm 0.389$ )     | 0                        | 1.775<br>( $\pm 0.107$ )          | 0                                 | 0.997    |
| <b>Eu<sub>2</sub>Ir<sub>2</sub></b><br>$\tau_{Ir}$                    | 153.470<br>( $\pm 1.514$ ) [ns]    | 29.175<br>( $\pm 2.946$ )    | 0                        | 3.301<br>( $\pm 0.128$ )          | 0                                 | 0.999    |
| <b>Eu<sub>2</sub>Flr<sub>2</sub></b><br>$\tau_{Eu}$                   | 582.139<br>( $\pm 0.009$ ) [ms]    | 711.277<br>( $\pm 635.956$ ) | 0.239<br>( $\pm 0.034$ ) | 15.896<br>( $\pm 1.882$ )         | 1.359<br>( $\pm 0.132$ )          | 0.999    |
| <b>Eu<sub>2</sub>Ir<sub>2</sub></b><br>$\tau_{Eu}$                    | 412.632<br>( $\pm 0.009$ ) [ms]    | 261.021<br>( $\pm 181.313$ ) | 0.361<br>( $\pm 0.086$ ) | 11.537<br>( $\pm 1.360$ )         | 1.462<br>( $\pm 0.186$ )          | 0.990    |
| <b>Eu<sub>2</sub>Flr<sub>2</sub></b><br>$\frac{\tau_{Ir}}{\tau_{Eu}}$ | 0.00113<br>( $\pm 0.000009$ )      | 4.875<br>( $\pm 0.269$ )     | 0                        | 1.782<br>( $\pm 0.065$ )          | 0                                 | 0.999    |
| <b>Eu<sub>2</sub>Ir<sub>2</sub></b><br>$\frac{\tau_{Ir}}{\tau_{Eu}}$  | 0.000378<br>( $\pm 0.000005$ )     | 10.781<br>( $\pm 0.867$ )    | 0                        | 2.497<br>( $\pm 0.104$ )          | 0                                 | 0.999    |

## Computational details

In this work, the theoretical calculations were performed for the  $[\text{Ir}^{\text{III}}(\text{CN})_2(\text{R,R-Fpinppy})_2]^-$  complexes that are present in the crystal structures of **R,R-FIr** and **Eu<sub>2</sub>FIr<sub>2</sub>** while the analogous theoretical studies for the  $[\text{Ir}^{\text{III}}(\text{CN})_2(\text{R,R-Fpinppy})_2]^-$  complexes, which are present in the crystal structures of **R,R-Ir** and **Eu<sub>2</sub>Ir<sub>2</sub>**, were performed and discussed within the previously published article on relative materials.<sup>51</sup> The calculations discussed here were performed using the ORCA 5.0.3 quantum chemistry software package,<sup>517</sup> while their results were visualized in VESTA software.<sup>518</sup> Initially, the geometry of this anionic metal complex, comprising an Ir(III) center along with the surrounding of *R,R*-Fpinppy and cyanido ligands, obtained from the SC-XRD experiment, was optimized using a DFT method employing the B3LYP hybrid exchange-correlation functional as it has demonstrated reasonable performance in our previous study on the mentioned analogs.<sup>51</sup> In our computational approach, we entirely excluded the counterions present in the crystal structure as well as solvent molecules. We used the def2-TZVP basis set in conjunction with the charge-dependent atom-pairwise dispersion correction based on the D4(EEQ)-ATM model.<sup>519,520</sup> For the calculations, the LR-CPCM solvation model was employed using water as the solvent.<sup>521</sup> A comparison between the geometry of the investigated Ir(III) complex obtained from the SC-XRD studies and its optimized geometry for the ground electronic state is shown in Fig. S31, while selected parameters for these two geometries are compared in Table S24. The optimized geometry displays overall good agreement with the experimental one, with deviations of approximately 0.02 Å for bond lengths, but, unfortunately, differences in the angles are more pronounced and reach a maximum of 4.8 degrees. They mainly result from the gas-phase optimization, which, as opposed to including the whole crystal structure, imposes certain constraints on the geometry. This might result in some inconsistencies between the computed results of optical properties and the experimental spectroscopic data.

The restricted Kohn-Sham determinant of the ground state was then used as the reference for the subsequent SOC TD-DFT calculations. To simulate the UV-vis absorption spectra, singlet excited states were optimized using TD-DFT and subsequently mixed with calculated triplet excited states, based on the optimized ground-state geometry from the previous step. Scalar relativistic effects were incorporated using the zeroth-order regular approximation (ZORA),<sup>522,523</sup> along with a compatible segmented all-electron relativistically contracted basis set SARC-ZORA-TZVP, employing the SARC/J general-purpose Coulomb fitting.<sup>524,525</sup> To speed up the computation of two-electron integrals, the chain-of-spheres algorithm for the exchange part (COSX) was employed alongside the resolution-of-identity approximation for the Coulomb part (RIJ).<sup>526,527</sup> Spin-orbit integrals were computed using the RI-SOMF(1X) approximation, which involves using a mean-field potential with the inclusion of one-electron terms, the Coulomb term calculated using the RI approximation, and exchange terms evaluated via one-center exact integrals, including spin-other-orbit interactions, while omitting DFT local correlation terms.<sup>528</sup> The maximum number of centers included in the integrals was limited to four. The lowest-energy states obtained at the TD-DFT stage for the ground state geometry are gathered in Table S25. Moreover, the list of the first 30 excited singlet states (based on the ground-state geometry optimized in the previous step) is provided in Table S26, along with the SOC states obtained by mixing singlets and triplets using the calculated spin-orbit coupling. The theoretical UV-vis absorption spectra, shown in Fig. S34, were simulated using the *orca\_mapspc* tool, applying a broadening of 1800 cm<sup>-1</sup> for both singlets only (TD-DFT) and spin-orbit-corrected states (SOC), and compared with the experimental spectrum. The pertinent molecular orbitals contributing most significantly to the first five singlet and triplet states (Table S25) are depicted in Fig. S32. To gain a better understanding of the light absorption mechanism (and subsequent emission from those levels), difference density maps for the first nine excited spin-orbit states were plotted in Fig. S33. Upon inspection, it is evident that the transitions are predominantly of a metal-to-ligand charge transfer (MLCT) character, with a slight contribution from the cyanido-to-*R,R*-Fpinppy (ligand-to-ligand) charge transfer mechanisms.

In the final step, to elucidate the observed luminescence, we performed the geometry optimization of the first excited spin-orbit state, leveraging ORCA's capability to calculate gradients for mixed states. Following optimization, we presented several relevant SOC-corrected states for the new geometry in Tables S27 and S28, along with the related molecular orbitals in Fig. S36, while the optimized geometry for the excited state is visualized in Fig. S31b. From the calculated density electron difference maps, it can be inferred that the primary mechanism of the observed phosphorescence is from the MLCT-type excited state, where the related CT transition involves the *R,R*-Fpinppy ligands and Ir(III) centers, with a slight contribution from cyanido units and the admixture of intra-ligand (*R,R*-Fpinppy) electronic transitions (Fig. S36). The energies obtained for the spin-orbit states were compared with the emission spectra of **R,R-FIr** (Fig. S37, comparison with the previously reported experimental and computational data for **R,R-Ir** was also shown). We did not present relative intensities or lifetimes of the simulated emission bands based on calculated dipole transition moments, due to the significant impact of vibronic coupling and intersystem crossing rates, the simulation of which is beyond the scope of this work, but the height of the bars represents the number of close-lying in energy SOC states.

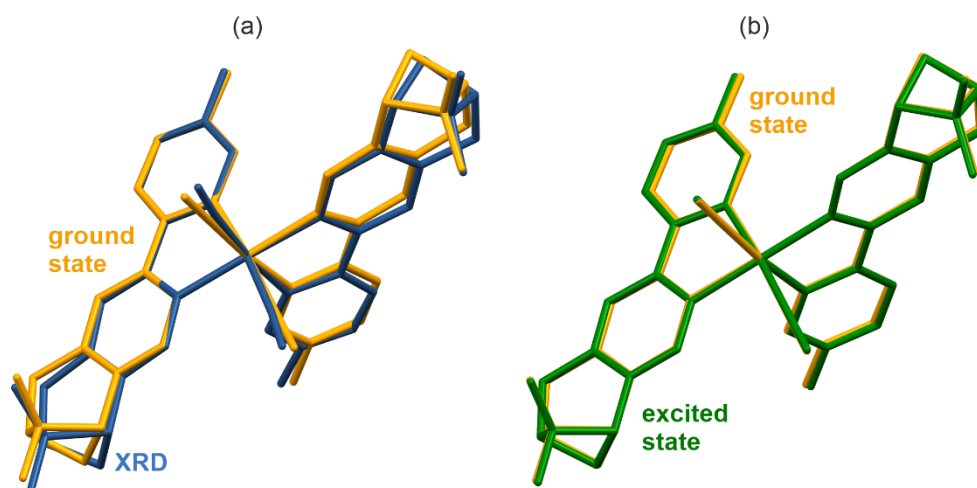

**Fig. S31** Visual comparison of the experimental geometry of the  $[\text{Ir}^{\text{III}}(\text{CN})_2(\text{R,R-Fpinppy})_2]^-$  complex obtained from the SC-XRD experiment for **R,R-FIr** with the optimized geometry for the ground electronic state (a) and the first excited spin-orbit state (Table S26) (b).

**Table S24** The set of representative structural parameters for the  $[\text{Ir}^{\text{III}}(\text{CN})_2(\text{R},\text{R-Fpinppy})_2]^-$  complex from the experimental SC-XRD data (compound **R,R-FIr**, Fig. S4) and for DFT-optimized geometry for its ground electronic state and first excited SO-state (Table S26).

|                                                                                                                         | SC-XRD model | Optimized ground state | Optimized excited state |
|-------------------------------------------------------------------------------------------------------------------------|--------------|------------------------|-------------------------|
| Selected bond lengths <i>cis</i> - $[\text{Ir}^{\text{III}}(\text{CN})_2(\text{R},\text{R-Fpinppy})_2]^-$ complexes / Å |              |                        |                         |
| Ir1–C1                                                                                                                  | 2.052(6)     | 2.056                  | 2.069                   |
| Ir1–C2                                                                                                                  | 2.057(6)     | 2.057                  | 2.073                   |
| Ir1–C3                                                                                                                  | 2.047(5)     | 2.056                  | 2.065                   |
| Ir1–C21                                                                                                                 | 2.048(6)     | 2.056                  | 2.058                   |
| Ir1–N3                                                                                                                  | 2.059(5)     | 2.070                  | 2.087                   |
| Ir1–N4                                                                                                                  | 2.051(5)     | 2.070                  | 2.047                   |
| Selected angles in <i>cis</i> - $[\text{Ir}^{\text{III}}(\text{CN})_2(\text{R},\text{R-Fpinppy})_2]^-$ complexes / °    |              |                        |                         |
| C1–Ir1–C2                                                                                                               | 87.9(2)      | 91.1                   | 90.7                    |
| C1–Ir1–C3                                                                                                               | 93.1(2)      | 90.6                   | 90.6                    |
| C1–Ir1–C21                                                                                                              | 173.5(3)     | 175.5                  | 176.0                   |
| C1–Ir1–N3                                                                                                               | 91.6(2)      | 90.1                   | 89.4                    |
| C1–Ir1–N4                                                                                                               | 94.1(2)      | 96.3                   | 95.1                    |
| C2–Ir1–C3                                                                                                               | 173.7(2)     | 175.5                  | 175.1                   |
| C2–Ir1–C21                                                                                                              | 90.5(2)      | 90.7                   | 89.8                    |
| C2–Ir1–N3                                                                                                               | 93.8(2)      | 96.2                   | 95.8                    |
| C2–Ir1–N4                                                                                                               | 95.3(2)      | 90.5                   | 90.0                    |
| C3–Ir1–C21                                                                                                              | 89.1(2)      | 87.9                   | 89.3                    |
| C3–Ir1–N3                                                                                                               | 80.0(2)      | 79.6                   | 79.5                    |
| C3–Ir1–N4                                                                                                               | 90.8(2)      | 93.5                   | 94.6                    |
| C21–Ir1–N3                                                                                                              | 94.8(2)      | 93.7                   | 94.5                    |
| C21–Ir1–N4                                                                                                              | 79.8(2)      | 79.6                   | 81.0                    |
| N3–Ir1–N4                                                                                                               | 169.4(2)     | 170.6                  | 172.7                   |
| CShM parameter (Table S4)                                                                                               |              |                        |                         |
| HP-6                                                                                                                    | 30.400       | 29.443                 | 29.602                  |
| PPY-6                                                                                                                   | 26.347       | 27.690                 | 27.514                  |
| OC-6                                                                                                                    | <b>0.570</b> | <b>0.486</b>           | <b>0.447</b>            |
| TPR-6                                                                                                                   | 14.050       | 15.815                 | 15.586                  |
| JPPY-6                                                                                                                  | 30.239       | 31.370                 | 31.174                  |
| Geometry                                                                                                                | OC-6         | OC-6                   | OC-6                    |

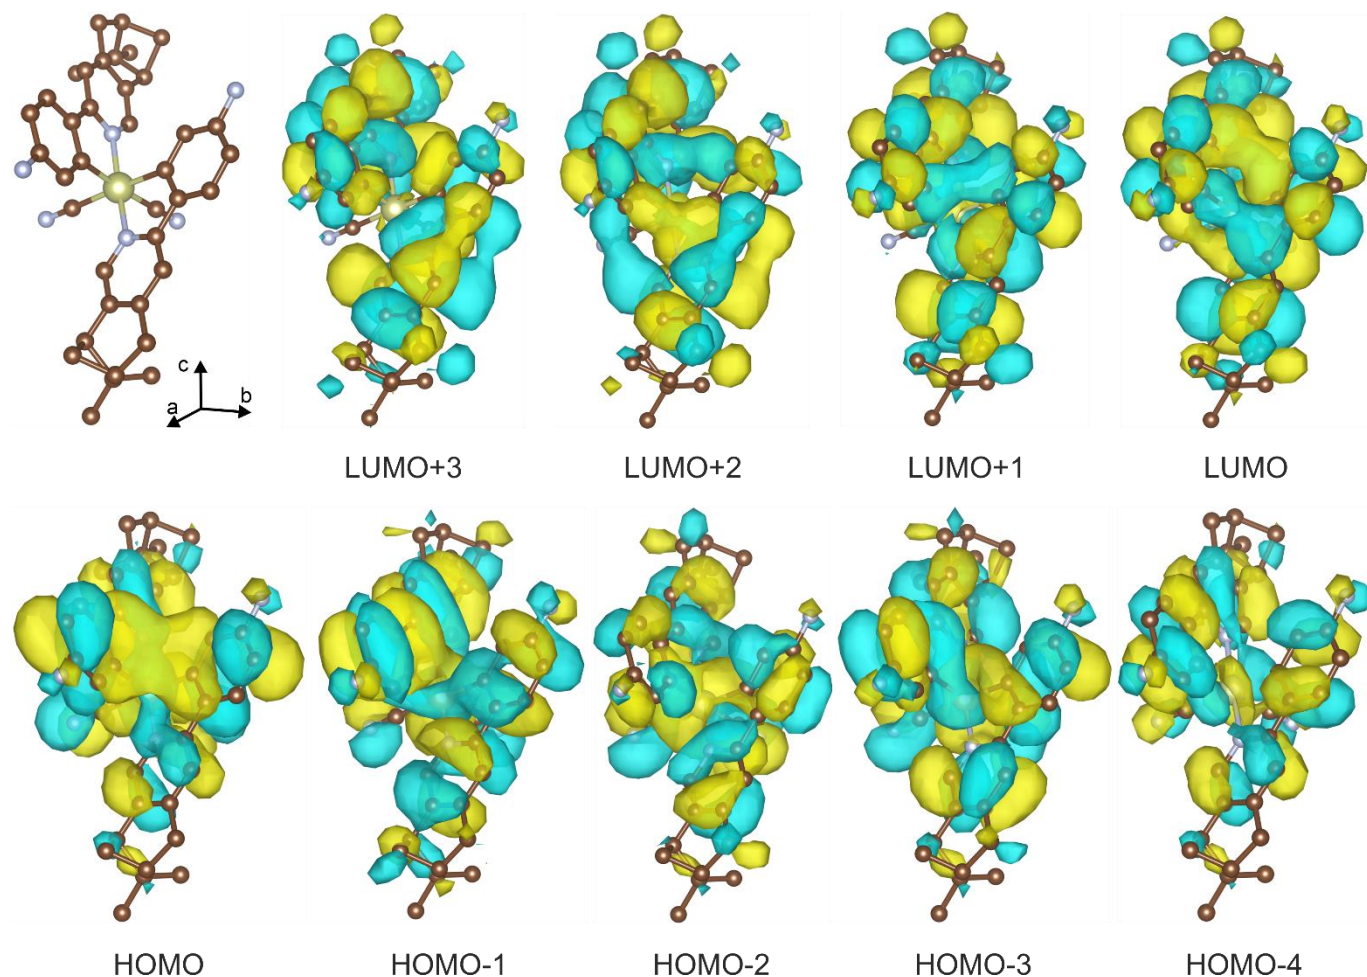

**Fig. S32** Visualization of selected molecular orbitals for the optimized ground state of  $[\text{Ir}^{\text{III}}(\text{CN})_2(\text{R,R-Fpinppy})_2]^-$  complexes. Hydrogen atoms were omitted for clarity. The yellow part represents a positive sign of electron density while light blue represents a negative sign. Orbitals are plotted with an isosurface level of 0.01.

**Table S25** The computed energies of the five lowest-lying excited singlet and triplet states of  $[\text{Ir}^{\text{III}}(\text{CN})_2(\text{R},\text{R}\text{-Fpinppy})_2]^-$  complexes in their optimized geometry of the ground electronic state, shown together with the weights of molecular orbitals (shown in Fig. S32) that contribute to each excitation from the ground state. Each state factor greater than 0.1 was bolded.

| State | Singlets                                                                                                                           | Energy / $\text{cm}^{-1}$ | Triplets                                                                                                                                                                                                                                                                               | Energy / $\text{cm}^{-1}$ |
|-------|------------------------------------------------------------------------------------------------------------------------------------|---------------------------|----------------------------------------------------------------------------------------------------------------------------------------------------------------------------------------------------------------------------------------------------------------------------------------|---------------------------|
|       | Linear combination of molecular orbitals and corresponding weights                                                                 |                           | Linear combination of molecular orbitals and corresponding weights                                                                                                                                                                                                                     |                           |
| 1     | HOMO-4→LUMO (0.012)<br><b>HOMO→LUMO (0.972)</b>                                                                                    | 26930.6                   | HOMO-4→LUMO (0.063)<br>HOMO-4→LUMO+2 (0.019)<br>HOMO-3→LUMO+1 (0.016)<br>HOMO-3→LUMO+3 (0.021)<br>HOMO-2→LUMO (0.057)<br>HOMO-1→LUMO+1 (0.256)<br>HOMO-1→LUMO+3 (0.014)<br><b>HOMO→LUMO (0.461)</b>                                                                                    | 23228.2                   |
| 2     | HOMO-4→LUMO+1 (0.013)<br><b>HOMO→LUMO+1 (0.971)</b>                                                                                | 27379.5                   | HOMO-4→LUMO+1 (0.047)<br>HOMO-4→LUMO+3 (0.025)<br>HOMO-3→LUMO (0.028)<br>HOMO-3→LUMO+2 (0.018)<br>HOMO-2→LUMO+1 (0.058)<br><b>HOMO-1→LUMO (0.333)</b><br><b>HOMO→LUMO+1 (0.374)</b><br>HOMO→LUMO+3 (0.017)                                                                             | 23323.2                   |
| 3     | <b>HOMO-3→LUMO (0.130)</b><br>HOMO-2→LUMO+1 (0.098)<br><b>HOMO-1→LUMO (0.746)</b>                                                  | 30286.4                   | HOMO-4→LUMO (0.036)<br>HOMO-4→LUMO+2 (0.023)<br>HOMO-3→LUMO+1 (0.048)<br>HOMO-3→LUMO+3 (0.016)<br><b>HOMO-2→LUMO (0.181)</b><br><b>HOMO-1→LUMO+1 (0.158)</b><br><b>HOMO→LUMO (0.435)</b><br>HOMO→LUMO+2 (0.010)                                                                        | 27115.2                   |
| 4     | <b>HOMO-3→LUMO+1 (0.108)</b><br><b>HOMO-2→LUMO (0.253)</b><br><b>HOMO-1→LUMO+1 (0.609)</b>                                         | 30382.9                   | HOMO-4→LUMO+1 (0.012)<br>HOMO-4→LUMO+3 (0.024)<br>HOMO-3→LUMO (0.047)<br>HOMO-3→LUMO+2 (0.035)<br><b>HOMO-2→LUMO+1 (0.153)</b><br><b>HOMO-1→LUMO (0.145)</b><br><b>HOMO→LUMO+1 (0.489)</b><br>HOMO→LUMO+3 (0.015)                                                                      | 27131.0                   |
| 5     | HOMO-4→LUMO (0.0100)<br>HOMO-3→LUMO+1 (0.047)<br><b>HOMO-2→LUMO (0.140)</b><br>HOMO-1→LUMO+1 (0.050)<br><b>HOMO→LUMO+2 (0.734)</b> | 30888.5                   | HOMO-4→LUMO (0.021)<br>HOMO-4→LUMO+2 (0.050)<br>HOMO-3→LUMO (0.013)<br>HOMO-3→LUMO+1 (0.030)<br>HOMO-3→LUMO+3 (0.041)<br>HOMO-2→LUMO (0.067)<br>HOMO-2→LUMO+1 (0.013 )<br>HOMO-2→LUMO+2 (0.012)<br>HOMO-1→LUMO+1 (0.040)<br><b>HOMO-1→LUMO+3 (0.118)</b><br><b>HOMO→LUMO+2 (0.509)</b> | 28562.4                   |

**Table S26** The computed energies of singlet states and SO-states for the ground geometry of  $[\text{Ir}^{\text{III}}(\text{CN})_2(\text{R},\text{R}\text{-Fpinppy})_2]^-$  complexes, and the composition of SO-states in terms of singlet and triplet states for the 30 lowest-lying states.

| TD-DFT (singlets) |                           |       | SOC corrected TD-DFT (mixed) |                    |       |                           |       |                           |       |                           |
|-------------------|---------------------------|-------|------------------------------|--------------------|-------|---------------------------|-------|---------------------------|-------|---------------------------|
| State             | Energy / $\text{cm}^{-1}$ | State | Energy / $\text{cm}^{-1}$    | Spin               | State | Energy / $\text{cm}^{-1}$ | State | Energy / $\text{cm}^{-1}$ | State | Energy / $\text{cm}^{-1}$ |
| 1                 | 26930.6                   | 1     | 23779.9                      | 1 (96%)            | 31    | 31218.9                   | 61    | 34368.6                   | 90    | 36897.9                   |
| 2                 | 27379.5                   | 2     | 23793.7                      | 1 (96%)            | 32    | 31243.7                   | 62    | 34829.8                   | 91    | 37103.7                   |
| 3                 | 30286.4                   | 3     | 23799.5                      | 1 (97%)            | 33    | 31258.4                   | 63    | 34897.4                   | 92    | 37184.3                   |
| 4                 | 30382.9                   | 4     | 23888.5                      | 1 (95%)            | 34    | 31399.5                   | 64    | 34943.8                   | 93    | 37350.8                   |
| 5                 | 30888.5                   | 5     | 23901.7                      | 1 (96%)            | 35    | 31422.6                   | 65    | 35182                     | 94    | 37368.3                   |
| 6                 | 31221.6                   | 6     | 23910.5                      | 1 (97%)            | 36    | 31980.4                   | 66    | 35208.1                   | 95    | 37369.9                   |
| 7                 | 31747.9                   | 7     | 26466.1                      | 0 (50%)<br>1 (41%) | 37    | 32009.2                   | 67    | 35280.4                   | 96    | 37474.6                   |
| 8                 | 32335.3                   | 8     | 26645.5                      | 0 (41%)<br>1 (50%) | 38    | 32063.8                   | 68    | 35599.7                   | 97    | 37538.8                   |
| 9                 | 32855.3                   | 9     | 27206.7                      | 0 (3%)<br>1 (88%)  | 39    | 32197.1                   | 69    | 35860.7                   | 98    | 37587                     |
| 10                | 33059.2                   | 10    | 27208.1                      | 0 (3%)<br>1 (85%)  | 40    | 32236.3                   | 70    | 35937.2                   | 99    | 37625.3                   |
| 11                | 34243.8                   | 11    | 27252.3                      | 1 (93%)            | 41    | 32321.5                   | 71    | 35945.3                   | 100   | 37701.3                   |
| 12                | 34446.2                   | 12    | 27255.5                      | 0 (6%)<br>1 (88%)  | 42    | 32363.3                   | 72    | 35955.2                   | 101   | 37926.4                   |
| 13                | 35088.5                   | 13    | 27772.9                      | 0 (28%)<br>1 (66%) | 43    | 32622.8                   | 73    | 36026.5                   | 102   | 38237.8                   |
| 14                | 35356.1                   | 14    | 28003.2                      | 0 (29%)<br>1 (65%) | 44    | 32799.1                   | 74    | 36144                     | 103   | 38533                     |
| 15                | 35933.5                   | 15    | 29093.6                      | 0 (5%)<br>1 (85%)  | 45    | 33085.1                   | 75    | 36184.2                   | 104   | 38623.6                   |
| 16                | 36248.7                   | 16    | 29098.4                      | 1 (90%)            | 46    | 33113.4                   | 76    | 36194.3                   | 105   | 38757.8                   |
| 17                | 36656.1                   | 17    | 29131.2                      | 0 (4%)<br>1 (90%)  | 47    | 33161.2                   | 77    | 36212.8                   | 106   | 38767.1                   |
| 18                | 36892.9                   | 18    | 29200.4                      | 0 (16%)<br>1 (74%) | 48    | 33185.4                   | 78    | 36339.9                   | 107   | 38789.8                   |
| 19                | 36940.3                   | 19    | 29355.7                      | 0 (14%)<br>1 (81%) | 49    | 33221                     | 79    | 36399.8                   | 108   | 38809.7                   |
| 20                | 37422.3                   | 20    | 29407.6                      | 0 (1%)<br>1 (92%)  | 50    | 33243.4                   | 80    | 36451.9                   | 109   | 38840.5                   |
| 21                | 37907.2                   | 21    | 29504.2                      | 0 (3%)<br>1 (90%)  | 51    | 33708.6                   | 81    | 36454.6                   | 110   | 38862.1                   |
| 22                | 37975.4                   | 22    | 29518.4                      | 0 (9%)<br>1 (83%)  | 52    | 33806.7                   | 82    | 36600.1                   | 111   | 39093.1                   |
| 23                | 38557.3                   | 23    | 29550.1                      | 0 (1%)<br>1 (91%)  | 53    | 33847.8                   | 83    | 36607.4                   | 112   | 39253                     |
| 24                | 39679.3                   | 24    | 29898.9                      | 0 (2%)<br>1 (85%)  | 54    | 33938.2                   | 84    | 36653.5                   | 113   | 39265                     |
| 25                | 39796                     | 25    | 29960.8                      | 0 (2%)<br>1 (89%)  | 55    | 33957.5                   | 85    | 36668.2                   | 114   | 39295.6                   |
| 26                | 39803.9                   | 26    | 29993.1                      | 1 (89%)            | 56    | 34011.6                   | 86    | 36766.3                   | 115   | 39377.8                   |
| 27                | 40154.7                   | 27    | 30619.1                      | 0 (30%)<br>1 (56%) | 57    | 34022.8                   | 87    | 36801.7                   | 116   | 39392.1                   |
| 28                | 40324.7                   | 28    | 30775.7                      | 0 (14%)<br>1 (75%) | 58    | 34122.4                   | 88    | 36806.8                   | 117   | 39401.5                   |
| 29                | 40612.1                   | 29    | 30893                        | 0 (40%)<br>1 (49%) | 59    | 34130.7                   | 89    | 36871                     | 118   | 39499.6                   |
| 30                | 40756.6                   | 30    | 31079.2                      | 1 (85%)            | 60    | 34362.1                   | 90    | 36897.9                   | 119   | 39508.5                   |



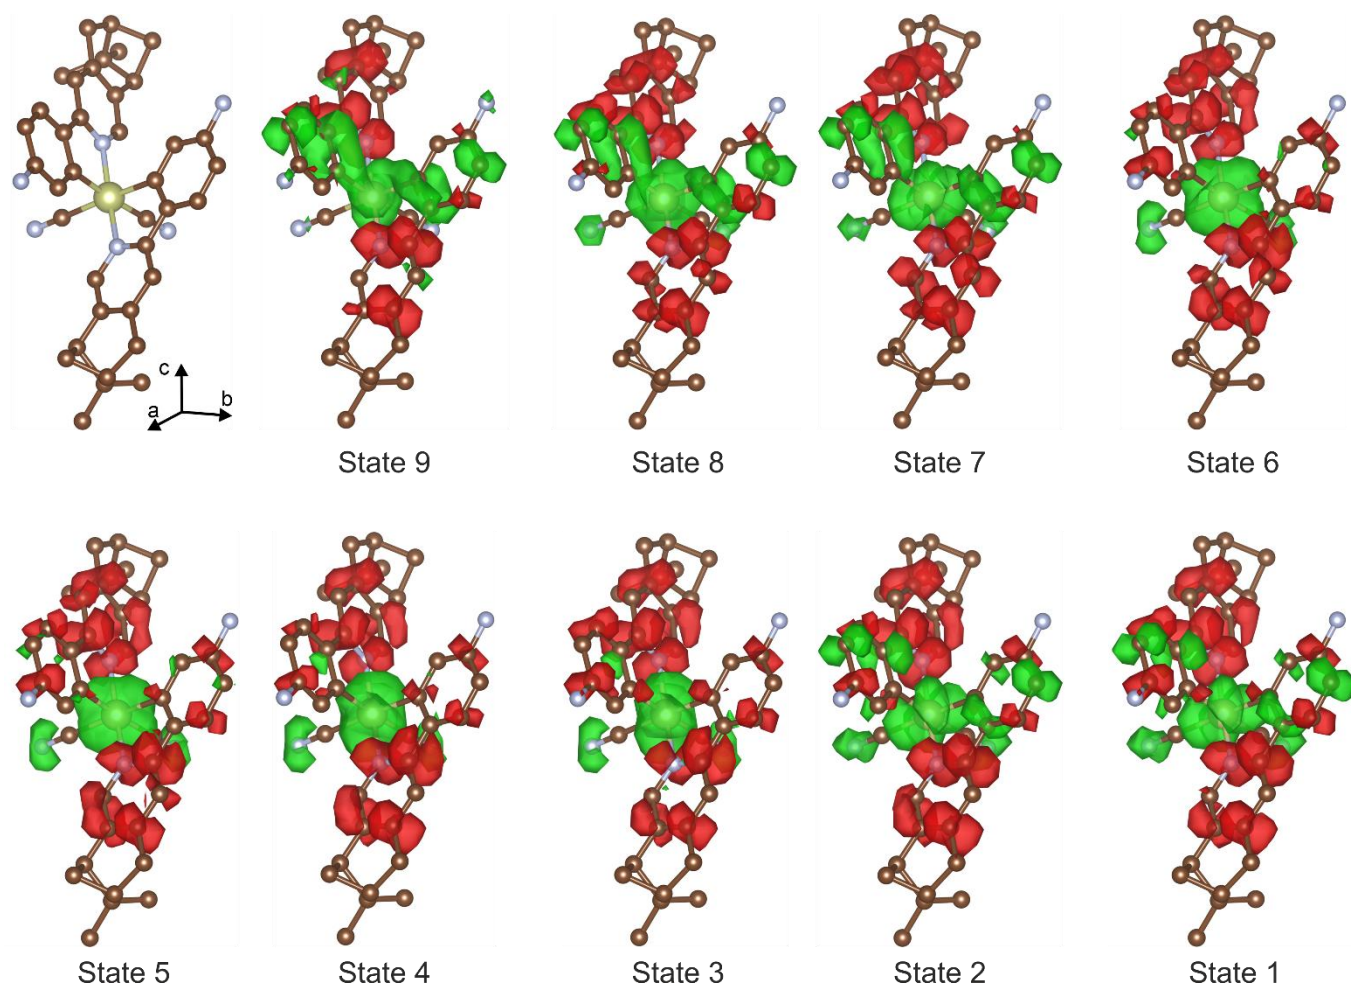

**Fig. S33** The difference electron density maps of the nine lowest SO-states for the ground state geometry of  $[\text{Ir}^{\text{III}}(\text{CN})_2(\text{R,R-Fpinppy})_2]^-$  complexes. The red color represents the positive (build-up) change in electron density, and the green represents the negative change (outflow) of electron density. Hydrogen atoms were omitted for clarity. The densities were plotted with an isosurface level of 0.00125.

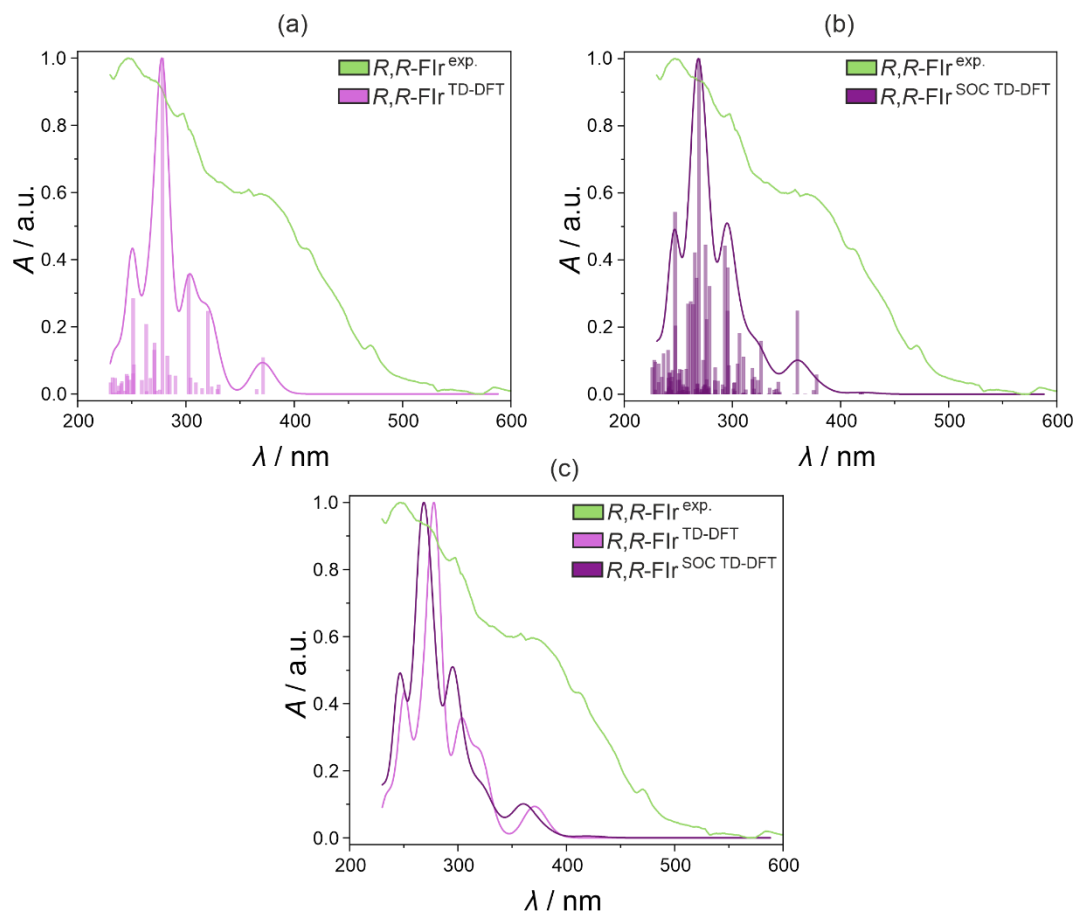

**Fig. S34** Comparison of the experimental solid-state UV-vis absorption spectra of  $R,R$ -FIr, containing  $[\text{Ir}^{\text{III}}(\text{CN})_2(R,R\text{-Fpinppy})_2]^-$  ions, with the calculated spectra for these complexes, including the comparison between the experiment and the results from the TD-DFT approach (a), the comparison between the experiment and the results from the TD-DFT with the involved SOC (b), and the comparison between the experiment and both mentioned computational approaches (c). In parts (a) and (b), the colored bars represent individual calculated excited states and the relative intensity of the related transitions from the ground state, while the solid lines represent the calculated spectrum from these transitions. In part (c), only the final calculated spectra are shown.

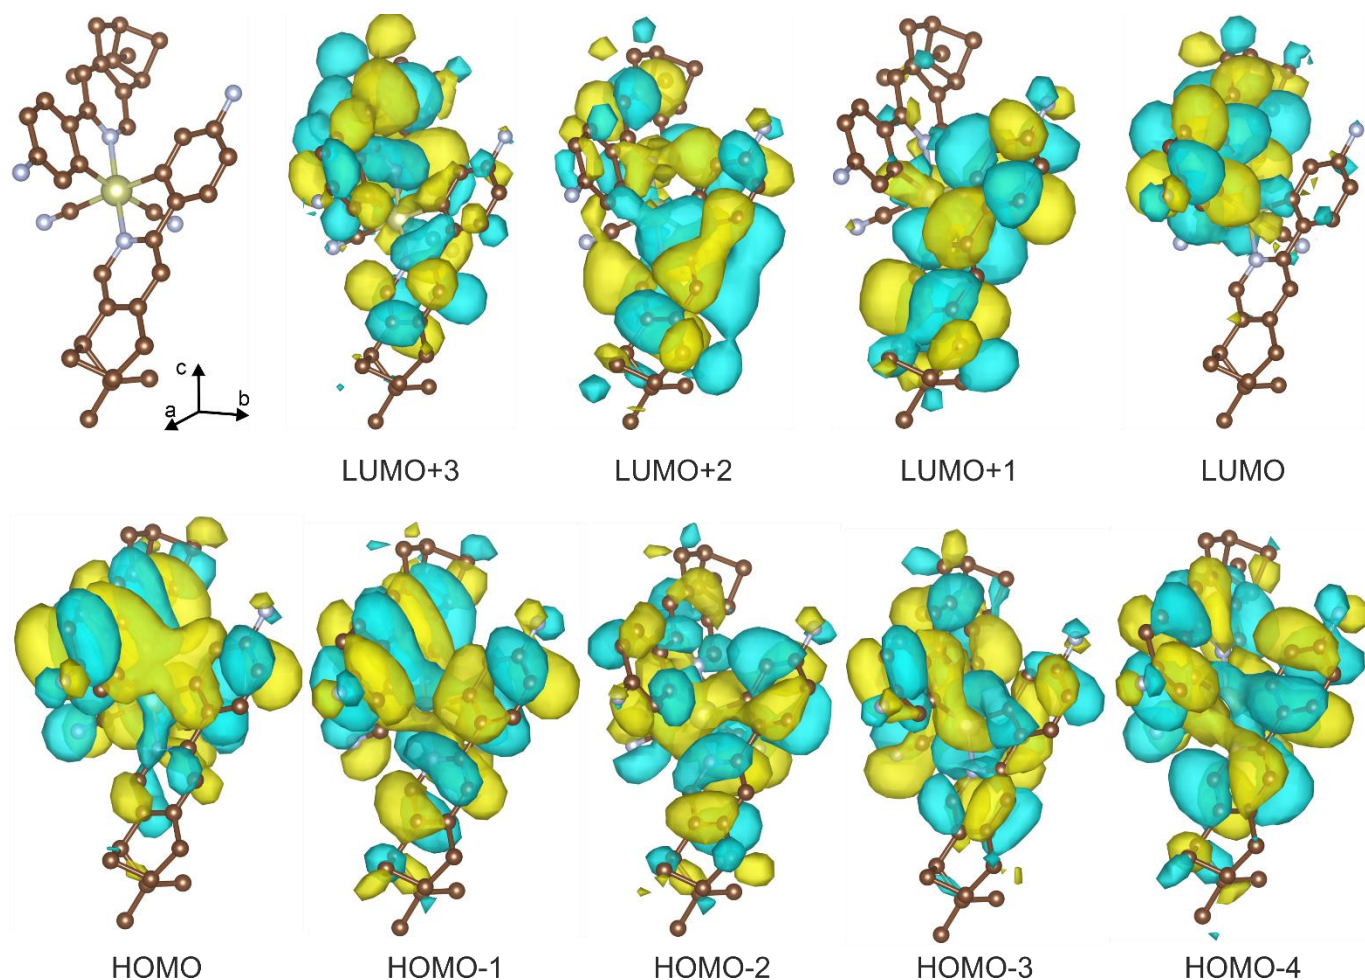

**Fig. S35** Visualization of selected molecular orbitals for the optimized excited state (i.e., the first excited SO-state, Table S26) of  $[\text{Ir}^{\text{III}}(\text{CN})_2(\text{R},\text{R}\text{-Fpinppy})_2]^-$  complexes. Hydrogen atoms were omitted for clarity. The yellow part represents a positive sign of electron density, while light blue represents a negative sign. Orbitals are plotted with an isosurface level of 0.01.

**Table S27** The computed energies of the five lowest-lying excited singlet and triplet states of  $[\text{Ir}^{\text{III}}(\text{CN})_2(\text{R},\text{R}\text{-Fpinppy})_2]^-$  complexes in their optimized geometry of the first excited electronic state (SO-state, Table S26), shown together with the weights of molecular orbitals (shown in Fig. S35) that contribute to each excitation from the ground state. Each state factor greater than 0.1 was bolded.

| State | Singlets                                                                                                                        |                           | Triplets                                                                                                                                                                                                                                                                              |                           |
|-------|---------------------------------------------------------------------------------------------------------------------------------|---------------------------|---------------------------------------------------------------------------------------------------------------------------------------------------------------------------------------------------------------------------------------------------------------------------------------|---------------------------|
|       | Linear combination of molecular orbitals and corresponding weights                                                              | Energy / $\text{cm}^{-1}$ | Linear combination of molecular orbitals and corresponding weights                                                                                                                                                                                                                    | Energy / $\text{cm}^{-1}$ |
| 1     | HOMO-4→LUMO (0.015)<br>HOMO-1→LUMO (0.012)<br><b>HOMO→LUMO (0.959)</b>                                                          | 23677.0                   | HOMO-4 → LUMO (0.017)<br>HOMO-1 → LUMO (0.207)<br><b>HOMO → LUMO (0.692)</b>                                                                                                                                                                                                          | 17588.9                   |
| 2     | HOMO-1→LUMO+1 (0.034)<br><b>HOMO→LUMO+1 (0.934)</b>                                                                             | 26584.8                   | HOMO-4 → LUMO+1 (0.066)<br>HOMO-4 → LUMO+2 (0.028)<br><b>HOMO-2 → LUMO+1 (0.132)</b><br>HOMO-1 → LUMO (0.0206)<br>HOMO-1 → LUMO+1 (0.374)<br>HOMO-1 → LUMO+2 (0.014)<br><b>HOMO → LUMO+1 (0.234)</b>                                                                                  | 23070.3                   |
| 3     | HOMO-3→LUMO (0.081)<br>HOMO-2→LUMO (0.045)<br><b>HOMO-1→LUMO (0.834)</b>                                                        | 27249.7                   | HOMO-5 → LUMO (0.018)<br>HOMO-4 → LUMO (0.044)<br>HOMO-3 → LUMO (0.034)<br>HOMO-2 → LUMO (0.077)<br><b>HOMO-1 → LUMO (0.531)</b><br>HOMO-1 → LUMO+1 (0.012)<br><b>HOMO → LUMO (0.237)</b>                                                                                             | 24446.3                   |
| 4     | HOMO-4→LUMO (0.039)<br><b>HOMO-2→LUMO (0.862)</b><br>HOMO-1→LUMO (0.063)                                                        | 28326.6                   | HOMO-8 → LUMO (0.024)<br><b>HOMO-4 → LUMO (0.108)</b><br><b>HOMO-3 → LUMO (0.415)</b><br><b>HOMO-2 → LUMO (0.136)</b><br>HOMO-1 → LUMO+2 (0.013)<br>HOMO-1 → LUMO+3 (0.036)<br>HOMO → LUMO (0.0205)<br>HOMO → LUMO+1 (0.023)<br>HOMO → LUMO+2 (0.029)<br><b>HOMO → LUMO+3 (0.119)</b> | 26343.9                   |
| 5     | <b>HOMO-3→LUMO (0.626)</b><br>HOMO-1→LUMO (0.048)<br><b>HOMO-1→LUMO+1 (0.208)</b><br>HOMO→LUMO+2 (0.024)<br>HOMO→LUMO+3 (0.034) | 29447.5                   | HOMO-4 → LUMO (0.010)<br>HOMO-4 → LUMO+1 (0.027)<br>HOMO-4 → LUMO+2 (0.026)<br>HOMO-3 → LUMO (0.017)<br>HOMO-3 → LUMO+1 (0.037)<br>HOMO-3 → LUMO+2 (0.011)<br><b>HOMO-2 → LUMO+1 (0.160)</b><br>HOMO-1 → LUMO+1 (0.018)<br>HOMO-1 → LUMO+2 (0.010)<br><b>HOMO → LUMO+1 (0.599)</b>    | 26658.9                   |

**Table S28** The computed energies of singlet states and SO-states for the excited-state geometry of  $[\text{Ir}^{\text{III}}(\text{CN})_2(\text{R},\text{R}\text{-Fpinpy})_2]^-$  complexes (i.e., the optimized geometry for the first excited SO-state, Table S26), and the composition of SO-states in terms of singlet and triplet states for the 30 lowest-lying states.

| TD-DFT (singlets) |                           |       |                           |                    | SOC corrected TD-DFT (mixed) |                           |       |                           |       |                           |
|-------------------|---------------------------|-------|---------------------------|--------------------|------------------------------|---------------------------|-------|---------------------------|-------|---------------------------|
| State             | Energy / $\text{cm}^{-1}$ | State | Energy / $\text{cm}^{-1}$ | Spin               | State                        | Energy / $\text{cm}^{-1}$ | State | Energy / $\text{cm}^{-1}$ | State | Energy / $\text{cm}^{-1}$ |
| 1                 | 23677.1                   | 1     | 18242.2                   | 1 (99%)            | 31                           | 29483.7                   | 61    | 33598.2                   | 91    | 36610.6                   |
| 2                 | 26583.3                   | 2     | 18243.6                   | 1 (99%)            | 32                           | 30133.4                   | 62    | 33678.7                   | 92    | 36715.1                   |
| 3                 | 27250.3                   | 3     | 18248.3                   | 1 (99%)            | 33                           | 30253.9                   | 63    | 33916.1                   | 93    | 36805.2                   |
| 4                 | 28326.0                   | 4     | 23456.8                   | 0 (5%)<br>1 (91%)  | 34                           | 30352.8                   | 64    | 33977.7                   | 94    | 37160.1                   |
| 5                 | 29446.4                   | 5     | 23652.6                   | 1 (97%)            | 35                           | 30394.6                   | 65    | 34028.9                   | 95    | 37243.3                   |
| 6                 | 29487.2                   | 6     | 23663.1                   | 1 (97%)            | 36                           | 30456.9                   | 66    | 34148.2                   | 96    | 37290.8                   |
| 7                 | 30721.8                   | 7     | 23683.1                   | 0 (61%)<br>1 (31%) | 37                           | 30525.1                   | 67    | 34251                     | 97    | 37327.7                   |
| 8                 | 31409.9                   | 8     | 24429.6                   | 0 (6%)<br>1 (87%)  | 38                           | 30562.5                   | 68    | 34305.8                   | 98    | 37464.7                   |
| 9                 | 31703.4                   | 9     | 24437.3                   | 0 (1%)<br>1 (95%)  | 39                           | 30647.6                   | 69    | 34344                     | 99    | 37525.3                   |
| 10                | 32119.5                   | 10    | 24925.7                   | 0 (24%)<br>1 (70%) | 40                           | 30937.3                   | 70    | 34450.3                   | 100   | 37581                     |
| 11                | 32333.4                   | 11    | 26279.9                   | 0 (51%)<br>1 (43%) | 41                           | 31661.6                   | 71    | 34509.6                   | 101   | 37627.2                   |
| 12                | 33470.3                   | 12    | 26577.1                   | 0 (25%)<br>1 (70%) | 42                           | 31884.8                   | 72    | 34555.6                   | 102   | 37664.7                   |
| 13                | 33826.1                   | 13    | 26854.1                   | 0 (7%)<br>1 (85%)  | 43                           | 31914.9                   | 73    | 34602.8                   | 103   | 37679.9                   |
| 14                | 34210.4                   | 14    | 26859.6                   | 1 (94%)            | 44                           | 31939                     | 74    | 34795.4                   | 104   | 37748.6                   |
| 15                | 34969.6                   | 15    | 27088.5                   | 0 (22%)<br>1 (72%) | 45                           | 32205.1                   | 75    | 35086.3                   | 105   | 37830.9                   |
| 16                | 35201.5                   | 16    | 27103.2                   | 0 (1%)<br>1 (94%)  | 46                           | 32285.9                   | 76    | 35243.8                   | 106   | 38084.3                   |
| 17                | 35520.4                   | 17    | 27284.7                   | 0 (9%)<br>1 (84%)  | 47                           | 32370.6                   | 77    | 35266.8                   | 107   | 38106.1                   |
| 18                | 36488.1                   | 18    | 27922.3                   | 0 (26%)<br>1 (70%) | 48                           | 32433.4                   | 78    | 35302.8                   | 108   | 38140.2                   |
| 19                | 36857.7                   | 19    | 28267.4                   | 1 (96%)            | 49                           | 32573.8                   | 79    | 35428.5                   | 109   | 38173.3                   |
| 20                | 36978.1                   | 20    | 28296                     | 0 (5%)<br>1 (88%)  | 50                           | 32651.5                   | 80    | 35440.7                   | 110   | 38209.3                   |
| 21                | 37579.3                   | 21    | 28439.1                   | 0 (31%)<br>1 (62%) | 51                           | 32657.9                   | 81    | 35487.7                   | 111   | 38263.8                   |
| 22                | 37754.7                   | 22    | 28629.5                   | 0 (30%)<br>1 (64%) | 52                           | 32823.4                   | 82    | 35727.4                   | 112   | 38410.2                   |
| 23                | 38016.3                   | 23    | 28942                     | 0 (7%)<br>1 (83%)  | 53                           | 33029.5                   | 83    | 35754.8                   | 113   | 38498.4                   |
| 24                | 38249.3                   | 24    | 28971.5                   | 0 (2%)<br>1 (88%)  | 54                           | 33112.5                   | 84    | 35854.8                   | 114   | 38801.8                   |
| 25                | 38628.0                   | 25    | 29124                     | 0 (9%)<br>1 (85%)  | 55                           | 33125.7                   | 85    | 36006.4                   | 115   | 38929.7                   |
| 26                | 39005.9                   | 26    | 29175.8                   | 0 (2%)<br>1 (91%)  | 56                           | 33212.7                   | 86    | 36123.9                   | 116   | 39030.2                   |
| 27                | 39836.7                   | 27    | 29232.5                   | 0 (9%)<br>1 (82%)  | 57                           | 33362.5                   | 87    | 36210.2                   | 117   | 39112.6                   |
| 28                | 39913.6                   | 28    | 29288.2                   | 0 (2%)<br>1 (88%)  | 58                           | 33375.2                   | 88    | 36234.4                   | 118   | 39167.7                   |
| 29                | 40451.9                   | 29    | 29358.5                   | 1 (92%)            | 59                           | 33451.9                   | 89    | 36423.5                   | 119   | 39183.1                   |
| 30                | 40621.3                   | 30    | 29398.1                   | 1 (92%)            | 60                           | 33545.9                   | 90    | 36602.8                   | 120   | 39250.5                   |



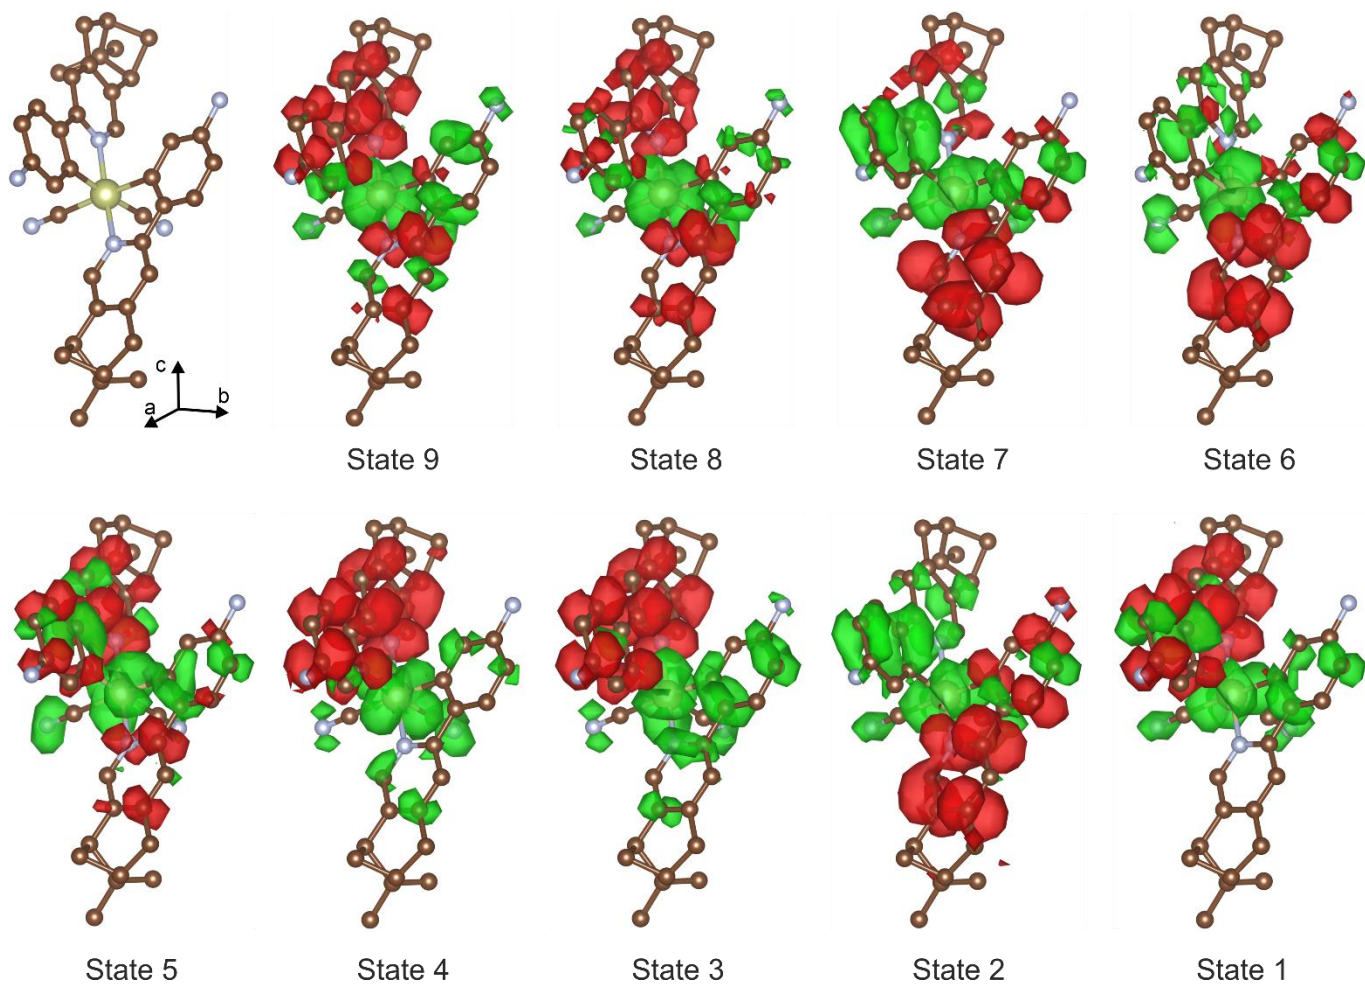

**Fig. S36** The difference electron density maps of the nine lowest SO-states for the excited-state geometry of  $[\text{Ir}^{\text{III}}(\text{CN})_2(\text{R,R-Fpinppy})_2]^-$  complexes (i.e., the optimized geometry for the first excited SO-state, Table S26). The red color represents the positive (build-up) change in electron density, and the green represents the negative change (outflow) of electron density. Hydrogen atoms were omitted for clarity. The densities were plotted with an isosurface level of 0.0009.

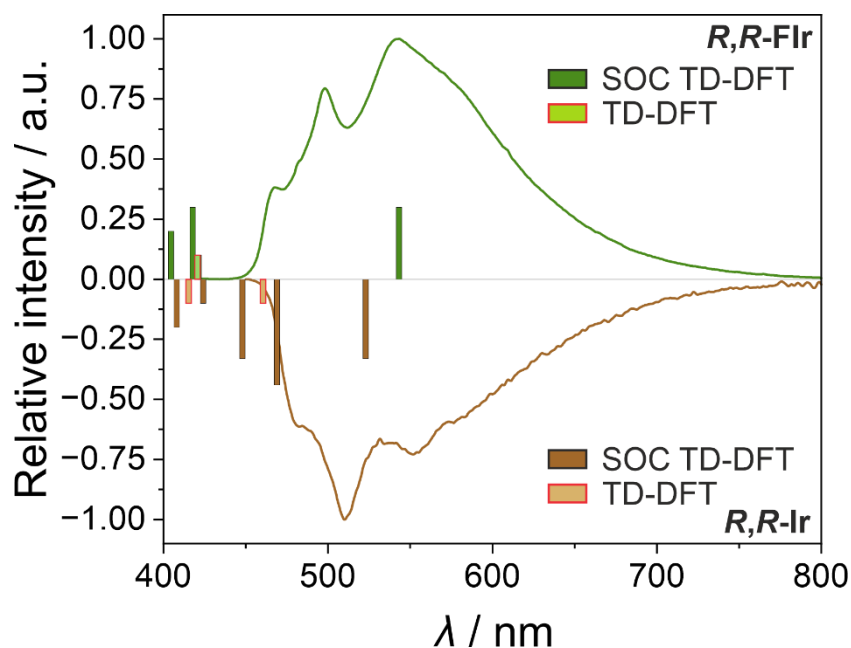

**Fig. S37** Comparison of experimental room-temperature emission spectra gathered for ***R,R*-FIr** and the previously published ***R,R*-Ir<sup>S1</sup>** with the energies of the electronic transitions calculated TD-DFT and SOC-containing TD-DFT approaches for the optimized excited-state geometry of  $[\text{Ir}^{\text{III}}(\text{CN})_2(\text{R,R-Fpinppy})_2]^-$  (for ***R,R*-FIr**) and  $[\text{Ir}^{\text{III}}(\text{CN})_2(\text{R,R-pinppy})_2]^-$  (for ***R,R*-Ir**). The height of the bars is connected with the number of states with similar energy. Results for ***R,R*-Ir** were plotted as negative to allow for easier comparison between the compounds.

**Table S29** Summary of the representative parameters characterizing luminescent thermometry in **Eu<sub>2</sub>Ir<sub>2</sub>** and **Eu<sub>2</sub>Flr<sub>2</sub>** materials, including maximal relative thermal sensitivity values ( $S_{r,max}$ ) and temperature ranges for which the  $S_r$  exceeds 1 % K<sup>-1</sup> (criterion for high optical thermometric performance). The related selected temperature dependences of thermometric parameters ( $\Delta$ ) and subsequent thermal sensitivity are presented in Fig. 4–7 while the whole set of characteristics of optical thermometry in the mentioned materials is presented in Fig. S21–S30.

| Eu <sub>2</sub> Ir <sub>2</sub>                                                                             |                                               |                                                        |                                           | Eu <sub>2</sub> Flr <sub>2</sub> |                                               |                                                        |                                           |
|-------------------------------------------------------------------------------------------------------------|-----------------------------------------------|--------------------------------------------------------|-------------------------------------------|----------------------------------|-----------------------------------------------|--------------------------------------------------------|-------------------------------------------|
| $\lambda_{\text{exc}}$ / nm                                                                                 | $\Delta$ parameter                            | $S_{r,\text{max}}$ / % K <sup>-1</sup><br>(at $T$ / K) | $T$ range for $S_r > 1$ % K <sup>-1</sup> | $\lambda_{\text{exc}}$ / nm      | $\Delta$ parameter                            | $S_{r,\text{max}}$ / % K <sup>-1</sup><br>(at $T$ / K) | $T$ range for $S_r > 1$ % K <sup>-1</sup> |
| Thermometry based on the emission intensity ratios                                                          |                                               |                                                        |                                           |                                  |                                               |                                                        |                                           |
| 356                                                                                                         | $I_{593.5 \text{ nm}} / I_{470.0 \text{ nm}}$ | 1.30 (200)                                             | 160 – 270                                 | 361                              | $I_{593.5 \text{ nm}} / I_{460.0 \text{ nm}}$ | 1.26 (205)                                             | 165 – 275                                 |
|                                                                                                             | $I_{617.0 \text{ nm}} / I_{470.0 \text{ nm}}$ | 2.42 (200)                                             | 145 – 280                                 |                                  | $I_{617.0 \text{ nm}} / I_{460.0 \text{ nm}}$ | 1.73 (210)                                             | 160 – 280                                 |
|                                                                                                             | $I_{690.0 \text{ nm}} / I_{470.0 \text{ nm}}$ | 1.18 (175)                                             | 145 – 225                                 |                                  | $I_{690.0 \text{ nm}} / I_{460.0 \text{ nm}}$ | 1.23 (200)                                             | 160 – 260                                 |
|                                                                                                             | $I_{695.5 \text{ nm}} / I_{470.0 \text{ nm}}$ | 0.79 (175)                                             | –                                         |                                  | $I_{695.5 \text{ nm}} / I_{460.0 \text{ nm}}$ | 1.42 (205)                                             | 165 – 280                                 |
| 380                                                                                                         | $I_{593.5 \text{ nm}} / I_{470.0 \text{ nm}}$ | 1.18 (205)                                             | 170 – 260                                 | 380                              | $I_{593.5 \text{ nm}} / I_{460.0 \text{ nm}}$ | 1.10 (220)                                             | 190 – 260                                 |
|                                                                                                             | $I_{617.0 \text{ nm}} / I_{470.0 \text{ nm}}$ | 2.92 (240)                                             | 150 – 290                                 |                                  | $I_{617.0 \text{ nm}} / I_{460.0 \text{ nm}}$ | 1.60 (220)                                             | 170 – 280                                 |
|                                                                                                             | $I_{690.0 \text{ nm}} / I_{470.0 \text{ nm}}$ | 1.31 (185)                                             | 150 – 255                                 |                                  | $I_{690.0 \text{ nm}} / I_{460.0 \text{ nm}}$ | 1.44 (220)                                             | 175 – 280                                 |
|                                                                                                             | $I_{695.5 \text{ nm}} / I_{470.0 \text{ nm}}$ | 152 (200)                                              | 150 – 280                                 |                                  | $I_{695.5 \text{ nm}} / I_{460.0 \text{ nm}}$ | 1.42 (225)                                             | 180 – 280                                 |
| 407                                                                                                         | $I_{593.5 \text{ nm}} / I_{470.0 \text{ nm}}$ | 0.83 (210)                                             | –                                         | –                                |                                               |                                                        |                                           |
|                                                                                                             | $I_{617.0 \text{ nm}} / I_{470.0 \text{ nm}}$ | 2.26 (215)                                             | 160 – 280                                 |                                  |                                               |                                                        |                                           |
|                                                                                                             | $I_{690.0 \text{ nm}} / I_{470.0 \text{ nm}}$ | 0.60 (205)                                             | –                                         |                                  |                                               |                                                        |                                           |
|                                                                                                             | $I_{695.5 \text{ nm}} / I_{470.0 \text{ nm}}$ | 1.26 (204)                                             | 170 – 270                                 |                                  |                                               |                                                        |                                           |
| 356                                                                                                         | $I_{593.5 \text{ nm}} / I_{504.5 \text{ nm}}$ | 1.13 (200)                                             | 170 – 250                                 | 361                              | $I_{593.5 \text{ nm}} / I_{492.5 \text{ nm}}$ | 1.18 (205)                                             | 170 – 260                                 |
|                                                                                                             | $I_{617.0 \text{ nm}} / I_{504.5 \text{ nm}}$ | 2.40 (205)                                             | 150 – 280                                 |                                  | $I_{617.0 \text{ nm}} / I_{492.5 \text{ nm}}$ | 1.63 (205)                                             | 155 – 280                                 |
|                                                                                                             | $I_{690.0 \text{ nm}} / I_{504.5 \text{ nm}}$ | 1.02 (180)                                             | 165 – 195                                 |                                  | $I_{690.0 \text{ nm}} / I_{492.5 \text{ nm}}$ | 1.16 (195)                                             | 160 – 245                                 |
|                                                                                                             | $I_{695.5 \text{ nm}} / I_{504.5 \text{ nm}}$ | 0.61 (160)                                             | –                                         |                                  | $I_{695.5 \text{ nm}} / I_{492.5 \text{ nm}}$ | 1.33 (205)                                             | 160 – 280                                 |
| 380                                                                                                         | $I_{593.5 \text{ nm}} / I_{504.5 \text{ nm}}$ | 0.97 (205)                                             | –                                         | 380                              | $I_{593.5 \text{ nm}} / I_{492.5 \text{ nm}}$ | 0.87 (225)                                             | –                                         |
|                                                                                                             | $I_{617.0 \text{ nm}} / I_{504.5 \text{ nm}}$ | 2.36 (215)                                             | 155 – 280                                 |                                  | $I_{617.0 \text{ nm}} / I_{492.5 \text{ nm}}$ | 1.45 (230)                                             | 180 – 280                                 |
|                                                                                                             | $I_{690.0 \text{ nm}} / I_{504.5 \text{ nm}}$ | 1.11 (185)                                             | 155 – 225                                 |                                  | $I_{690.0 \text{ nm}} / I_{492.5 \text{ nm}}$ | 1.24 (230)                                             | 185 – 280                                 |
|                                                                                                             | $I_{695.5 \text{ nm}} / I_{504.5 \text{ nm}}$ | 1.30 (200)                                             | 155 – 270                                 |                                  | $I_{695.5 \text{ nm}} / I_{492.5 \text{ nm}}$ | 1.22 (235)                                             | 195 – 280                                 |
| 407                                                                                                         | $I_{593.5 \text{ nm}} / I_{504.5 \text{ nm}}$ | 0.60 (210)                                             | –                                         | –                                |                                               |                                                        |                                           |
|                                                                                                             | $I_{617.0 \text{ nm}} / I_{504.5 \text{ nm}}$ | 2.44 (245)                                             | 165 – 280                                 |                                  |                                               |                                                        |                                           |
|                                                                                                             | $I_{690.0 \text{ nm}} / I_{504.5 \text{ nm}}$ | 0.38 (180)                                             | –                                         |                                  |                                               |                                                        |                                           |
|                                                                                                             | $I_{695.5 \text{ nm}} / I_{504.5 \text{ nm}}$ | 1.01 (205)                                             | 195 – 225                                 |                                  |                                               |                                                        |                                           |
| Thermometry based on the ratio between integrated areas of emission bands<br>(dependence on the bands)      |                                               |                                                        |                                           |                                  |                                               |                                                        |                                           |
| 380                                                                                                         | $A_{590 \text{ nm}} / A_{\text{Ir}}$          | 0.40 (190)                                             | –                                         | 380                              | $A_{590 \text{ nm}} / A_{\text{Ir}}$          | 0.52 (280)                                             | –                                         |
|                                                                                                             | $A_{617 \text{ nm}} / A_{\text{Ir}}$          | 1.86 (200)                                             | 140 – 280                                 |                                  | $A_{617 \text{ nm}} / A_{\text{Ir}}$          | 1.32 (220)                                             | 175 – 280                                 |
|                                                                                                             | $A_{690 \text{ nm}} / A_{\text{Ir}}$          | 0.82 (180)                                             | –                                         |                                  | $A_{690 \text{ nm}} / A_{\text{Ir}}$          | 1.00 (235)                                             | –                                         |
| Thermometry based on the ratio between integrated areas of emission bands<br>(dependence on the excitation) |                                               |                                                        |                                           |                                  |                                               |                                                        |                                           |
| 356                                                                                                         | $A_{617 \text{ nm}} / A_{\text{Ir}}$          | 1.87 (195)                                             | 135 – 280                                 | 361                              | $A_{617 \text{ nm}} / A_{\text{Ir}}$          | 1.41 (195)                                             | 150 – 280                                 |
| 380                                                                                                         | $A_{617 \text{ nm}} / A_{\text{Ir}}$          | 1.86 (200)                                             | 140 – 280                                 | 380                              | $A_{617 \text{ nm}} / A_{\text{Ir}}$          | 1.32 (220)                                             | 175 – 280                                 |
| 407                                                                                                         | $A_{617 \text{ nm}} / A_{\text{Ir}}$          | 1.63 (215)                                             | 160 – 280                                 |                                  |                                               |                                                        |                                           |
| Thermometry based on emission lifetime                                                                      |                                               |                                                        |                                           |                                  |                                               |                                                        |                                           |
| 380                                                                                                         | $\tau_{\text{Ir}}$                            | 1.45 (110)                                             | 78 – 171                                  | 380                              | $\tau_{\text{Ir}}$                            | 0.95 (80)                                              | –                                         |
| 361                                                                                                         | $\tau_{\text{Eu}}$                            | 1.08 (260)                                             | 238 – 260                                 | 361                              | $\tau_{\text{Eu}}$                            | 1.00 (280)                                             | –                                         |



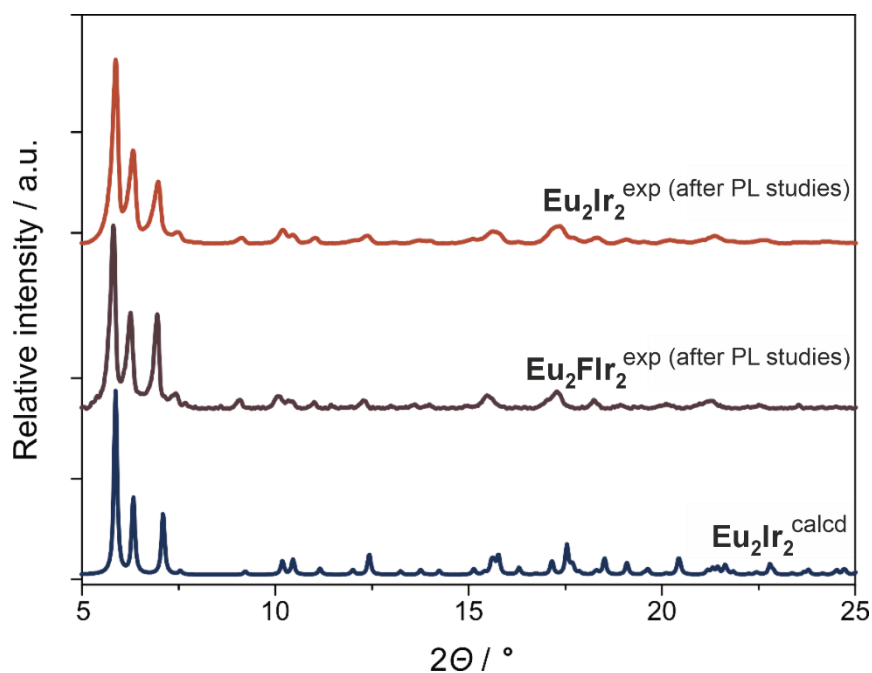

**Fig. S38** Comparison of the representative parts of the experimental (exp) P-XRD patterns gathered for the polycrystalline samples of  $\text{Eu}_2\text{Ir}_2$  and  $\text{Eu}_2\text{Flr}_2$  after performing on them the full set of solid-state temperature-variable photoluminescent (PL) measurements (related to the characterization of presented optical thermometry) with the P-XRD pattern calculated (calcd) for the structural model of  $\text{Eu}_2\text{Ir}_2$  obtained within the single-crystal X-ray diffraction experiment.

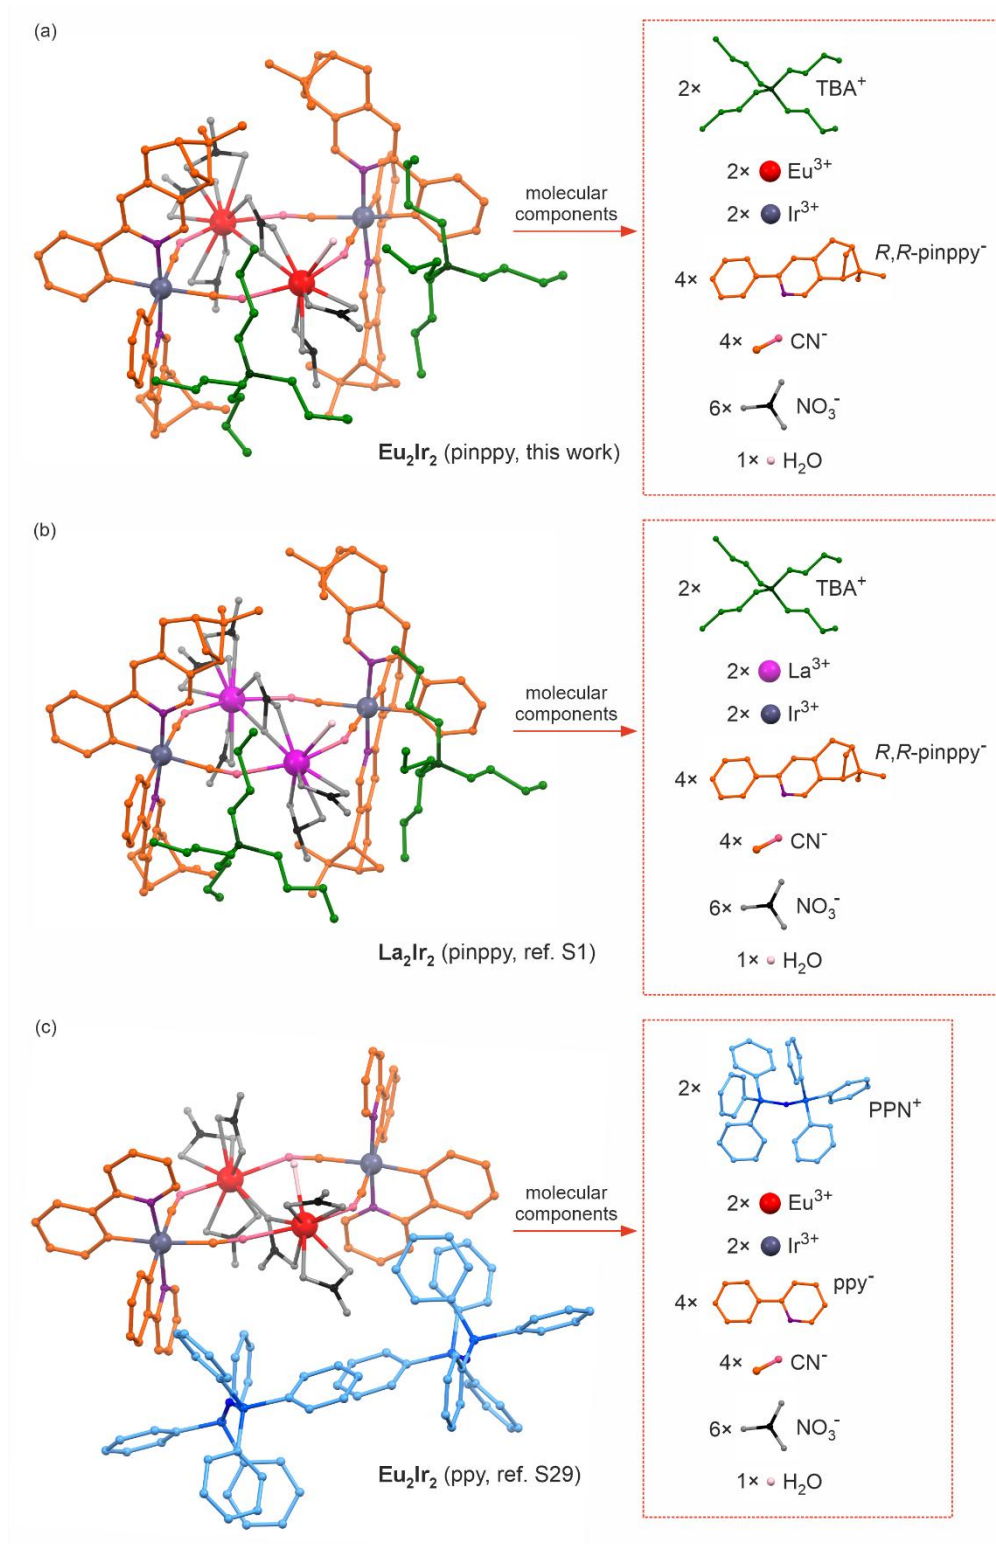

**Fig. S39** Comparison of the molecular building units of the reported compound of  $\text{Eu}_2\text{Ir}_2$  (a) with those for the previously reported  $\text{La}_2\text{Ir}_2$  structural analog (b), and the previously reported closely related  $\text{Eu}_2\text{Ir}_2$  compound with ppy ligands used instead of  $R,R$ -pinppy as well as  $\text{PPN}^+$  cations used instead of the  $\text{TBA}^+$  ones (c).<sup>S1,S29</sup> The full formulas of the presented compounds are as follows: (a)  $\text{Eu}_2\text{Ir}_2$  (with pinppy, this work) –  $(\text{TBA})_2\{[\text{Eu}^{\text{III}}(\text{NO}_3)_3(\text{H}_2\text{O})_{0.5}]_2[\text{Ir}^{\text{III}}(\text{CN})_2(R,R\text{-pinppy})_2]_2\} \cdot 2\text{H}_2\text{O}$ , (b)  $\text{La}_2\text{Ir}_2$  (with pinppy, ref. S1) –  $(\text{TBA})_2\{[\text{La}^{\text{III}}(\text{NO}_3)_3(\text{H}_2\text{O})_{0.5}]_2[\text{Ir}^{\text{III}}(\text{CN})_2(R,R\text{-pinppy})_2]_2\}$ , (c)  $\text{Eu}_2\text{Ir}_2$  (with ppy, ref. S29) –  $(\text{PPN})_2\{[\text{Eu}^{\text{III}}(\text{NO}_3)_3(\text{H}_2\text{O})_{0.5}]_2[\text{Ir}^{\text{III}}(\text{CN})_2(\text{ppy})]_2\} \cdot 5\text{MeCN}$  ( $\text{TBA}$  = tetrabutylammonium,  $R,R$ -pinppy $^-$  = a carbanion form ( $R,R$ )-2-phenyl-4,5-pinenopyridine,  $\text{PPN}$  = bis(triphenylphosphine)iminium, ppy = a carbanion of 2-phenylpyridine). For the structures of (a) and (b), two alternative positions of nitrato ligands and coordinated water molecules (with partial occupancies) were found, but, for clarity, only single positions of the atoms are presented. The solvent molecules of crystallization are omitted. On the right side, all molecular components incorporated in the respective molecular building units are shown. All charged components (along with water molecules) were separately listed, and their number in the discussed molecular building unit is presented for each case. The related calculations of the overall charge of each of the illustrated compounds are included in Table S30.

**Table S30** Detailed calculations of the combined charges of cationic and anionic components of the molecular building units of the reported compound of **Eu<sub>2</sub>Ir<sub>2</sub>**, the previously reported **La<sub>2</sub>Ir<sub>2</sub>** structural analog, and the previously reported closely related **Eu<sub>2</sub>Ir<sub>2</sub>** compound with ppy ligands used instead of *R,R*-pinppy as well as PPN<sup>+</sup> cations used instead of the TBA<sup>+</sup> ones.<sup>S1,S29</sup> The visualization of the related molecular building units is presented in Fig. S39.

| Compound                                                                                                                     | <b>Eu<sub>2</sub>Ir<sub>2</sub></b> (with pinppy, this work)                                                                                                                                                                       | <b>La<sub>2</sub>Ir<sub>2</sub></b> (with pinppy, ref. S1)                                                                                                                                                       | <b>Eu<sub>2</sub>Ir<sub>2</sub></b> (with ppy, ref. S29)                                                                                                                                 |
|------------------------------------------------------------------------------------------------------------------------------|------------------------------------------------------------------------------------------------------------------------------------------------------------------------------------------------------------------------------------|------------------------------------------------------------------------------------------------------------------------------------------------------------------------------------------------------------------|------------------------------------------------------------------------------------------------------------------------------------------------------------------------------------------|
| Formula                                                                                                                      | (TBA) <sub>2</sub> {[Eu <sup>III</sup> (NO <sub>3</sub> ) <sub>3</sub> (H <sub>2</sub> O) <sub>0.5</sub> ] <sub>2</sub> [Ir <sup>III</sup> (CN) <sub>2</sub> ( <i>R,R</i> -pinppy) <sub>2</sub> ] <sub>2</sub> }·2H <sub>2</sub> O | (TBA) <sub>2</sub> {[La <sup>III</sup> (NO <sub>3</sub> ) <sub>3</sub> (H <sub>2</sub> O) <sub>0.5</sub> ] <sub>2</sub> [Ir <sup>III</sup> (CN) <sub>2</sub> ( <i>R,R</i> -pinppy) <sub>2</sub> ] <sub>2</sub> } | (PPN) <sub>2</sub> {[Eu <sup>III</sup> (NO <sub>3</sub> ) <sub>3</sub> (H <sub>2</sub> O) <sub>0.5</sub> ] <sub>2</sub> [Ir <sup>III</sup> (CN) <sub>2</sub> (ppy)] <sub>2</sub> }·5MeCN |
| Figure visualizing a molecular building unit                                                                                 | Fig. S39a                                                                                                                                                                                                                          | Fig. S39b                                                                                                                                                                                                        | Fig. S39c                                                                                                                                                                                |
| Cationic components of a molecular building unit                                                                             | 2 x TBA <sup>+</sup>                                                                                                                                                                                                               | 2 x TBA <sup>+</sup>                                                                                                                                                                                             | 2 x PPN <sup>+</sup>                                                                                                                                                                     |
|                                                                                                                              | 2 x Eu <sup>3+</sup>                                                                                                                                                                                                               | 2 x La <sup>3+</sup>                                                                                                                                                                                             | 2 x Eu <sup>3+</sup>                                                                                                                                                                     |
|                                                                                                                              | 2 x Ir <sup>3+</sup>                                                                                                                                                                                                               | 2 x Ir <sup>3+</sup>                                                                                                                                                                                             | 2 x Ir <sup>3+</sup>                                                                                                                                                                     |
| Combined charge of cationic components                                                                                       | (14+)                                                                                                                                                                                                                              | (14+)                                                                                                                                                                                                            | (14+)                                                                                                                                                                                    |
| Anionic components of a molecular building unit                                                                              | 4 x <i>R,R</i> -pinppy <sup>−</sup>                                                                                                                                                                                                | 4 x <i>R,R</i> -pinppy <sup>−</sup>                                                                                                                                                                              | 4 x ppy <sup>−</sup>                                                                                                                                                                     |
|                                                                                                                              | 4 x CN <sup>−</sup>                                                                                                                                                                                                                | 4 x CN <sup>−</sup>                                                                                                                                                                                              | 4 x CN <sup>−</sup>                                                                                                                                                                      |
|                                                                                                                              | 6 x NO <sub>3</sub> <sup>−</sup>                                                                                                                                                                                                   | 6 x NO <sub>3</sub> <sup>−</sup>                                                                                                                                                                                 | 6 x NO <sub>3</sub> <sup>−</sup>                                                                                                                                                         |
| Combined charge of anionic components                                                                                        | (14−)                                                                                                                                                                                                                              | (14−)                                                                                                                                                                                                            | (14−)                                                                                                                                                                                    |
| Overall charge of a molecular building unit                                                                                  | 0                                                                                                                                                                                                                                  | 0                                                                                                                                                                                                                | 0                                                                                                                                                                                        |
| Charge of a molecular cluster (i.e., combined molecular components of a building unit without TBA <sup>+</sup> counter-ions) | (2−)                                                                                                                                                                                                                               | (2−)                                                                                                                                                                                                             | (2−)                                                                                                                                                                                     |

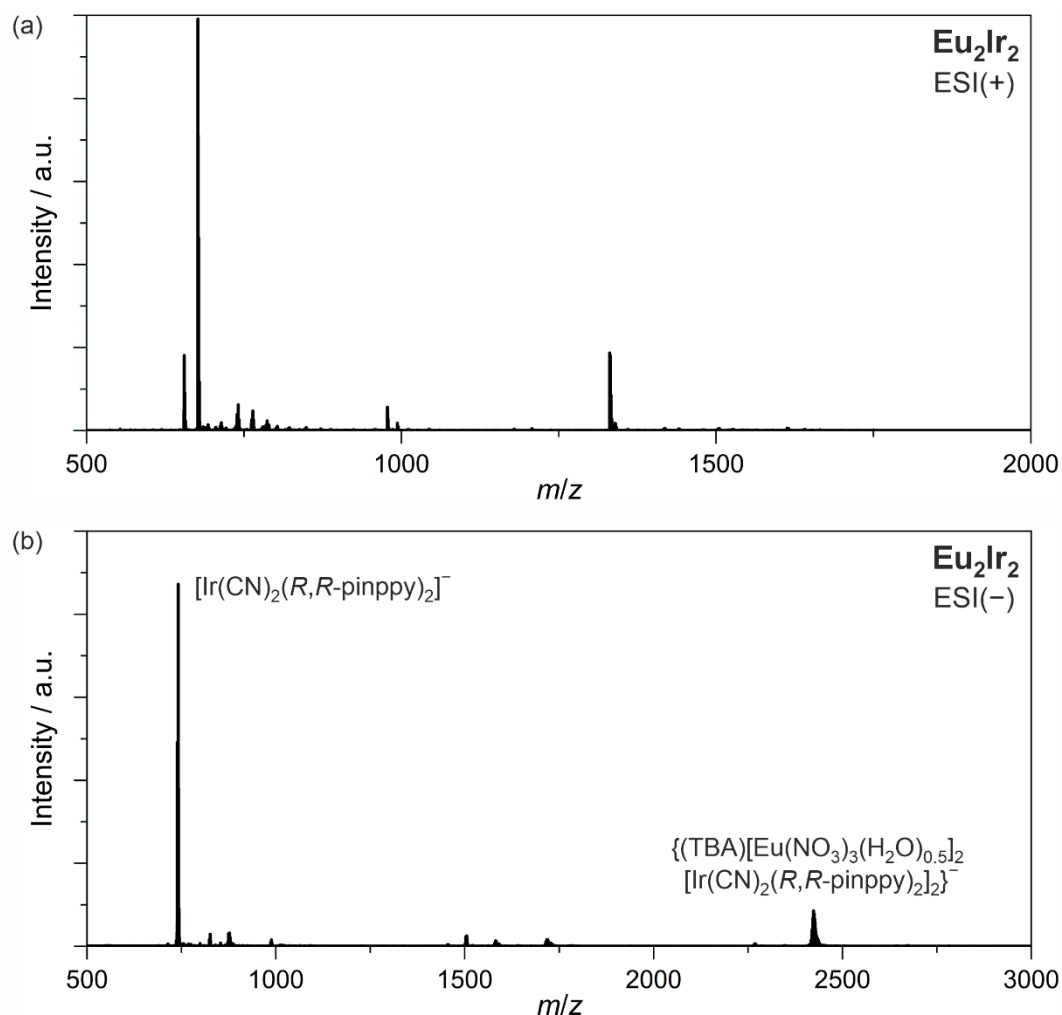

**Fig. S40** ESI-TOF mass spectra (MS) for the acetonitrile solution ( $c = 1 \text{ mg} \cdot \text{mL}^{-1}$ ) of  $\text{Eu}_2\text{Ir}_2$  in the 500–2000  $m/z$  range for the positive ionization (a) and in the 500–3000  $m/z$  range for the negative ionization (b). In (b), the two postulated compositions of species for the indicated  $m/z$  values were presented. The other peaks are discussed in the comment placed on the next page.

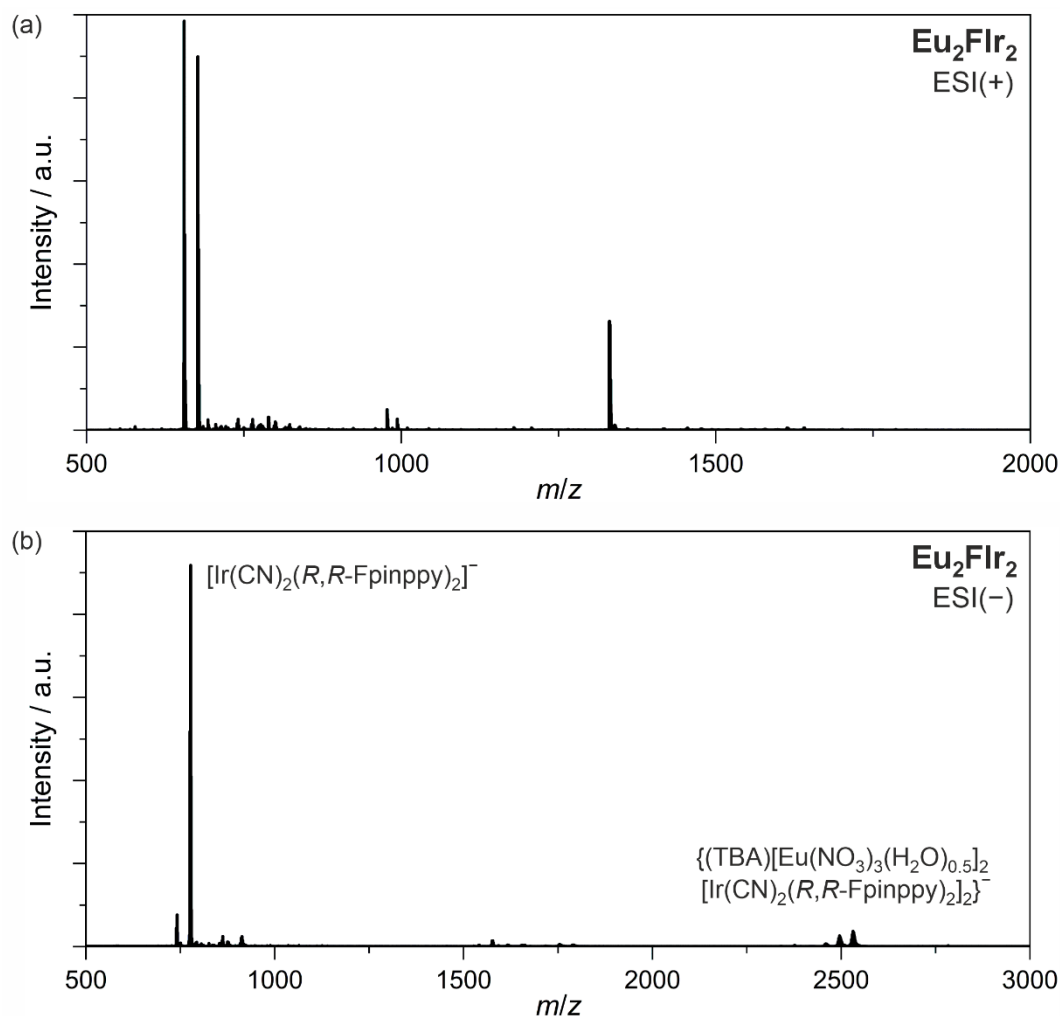

**Fig. S41** ESI-TOF mass spectra (MS) for the acetonitrile solution ( $c = 1 \text{ mg}\cdot\text{mL}^{-1}$ ) of  $\text{Eu}_2\text{Flr}_2$  in the 500–2000  $m/z$  range for the positive ionization (a) and in the 500–3000  $m/z$  range for the negative ionization (b). In (b), the two postulated compositions of species for the indicated  $m/z$  values were presented. The other peaks are discussed in the comment placed below.

**Comment to Fig. S40 and S41:** To collect the ESI-TOF mass spectra (MS), the air-stable powder samples of  $\text{Eu}_2\text{Ir}_2$  and  $\text{Eu}_2\text{Flr}_2$  were dissolved in pure acetonitrile (HPLC grade). The spectra were obtained for both positive and negative ionization modes. In positive ionisation, the same set of peaks with slightly amended intensity ratios is observed for both compounds (Fig. S40a and S41a, Table S31). These peaks can be mainly attributed to the presence of polynuclear  $\text{Eu}^{\text{III}}$ -based species with the mixture of nitrate anions and solvent molecules, which can form upon the decomposition of cluster species in the solution and/or during electrospray ionization. The Ir(III)-based complexes do not contribute significantly to the part of the spectra related to the positive ionization, as there are no distinct differences between the positions of the peaks for the two compounds differing in the mass of the pinppy-type ligands coordinated to the d-block metal ion. Conversely, the negative ionization spectra for both analogues (Fig. S40b and S41b, Table S31) confirm that most of the heterometallic coordination clusters undergo decomposition, resulting in the appearance of the main peak related to the free cyclometalated dicyanido-Ir(III) complexes. Much weaker, almost residual, signals related to the whole clusters, associated with one of the tetrabutylammonium cations, can be detected in both samples at high  $m/z$  ranges. Their overall contribution to the mass spectra is minor, indicating decomposition, which presumably does not only occur during ionization but also because of their instability in pure acetonitrile.

**Table S31** Comparison of the 15 most intense peaks in the mass spectra (ESI-TOF-MS) of **Eu<sub>2</sub>Ir<sub>2</sub>** and **Eu<sub>2</sub>Flr<sub>2</sub>** obtained for the solution of corresponding compounds in acetonitrile, in both the positive and negative ionization (see Fig. S40 and S41, respectively). The comment on the observed peaks is placed on the previous page.

| <b>Eu<sub>2</sub>Ir<sub>2</sub></b> |          |                            |          | <b>Eu<sub>2</sub>Flr<sub>2</sub></b> |          |                            |          |
|-------------------------------------|----------|----------------------------|----------|--------------------------------------|----------|----------------------------|----------|
| <b>positive ionization</b>          |          | <b>negative ionization</b> |          | <b>positive ionization</b>           |          | <b>negative ionization</b> |          |
| <i>m/z</i>                          | <i>I</i> | <i>m/z</i>                 | <i>I</i> | <i>m/z</i>                           | <i>I</i> | <i>m/z</i>                 | <i>I</i> |
| 676.9939                            | 214087   | <b>741.2415</b>            | 61067    | 655.0227                             | 59090    | <b>777.2248</b>            | 36714    |
| 677.9969                            | 100231   | <b>739.2387</b>            | 34434    | 676.9996                             | 53940    | <b>775.2229</b>            | 20705    |
| 1331.0169                           | 40323    | <b>742.2449</b>            | 26623    | 656.0251                             | 28254    | <b>778.2282</b>            | 16367    |
| 655.0169                            | 39083    | 740.2427                   | 16291    | 678.0026                             | 26109    | 776.2258                   | 9992     |
| 1332.0204                           | 38834    | 743.2473                   | 6291     | 1331.0286                            | 15734    | 779.2312                   | 3531     |
| 678.9996                            | 25408    | 2423.5282                  | 5951     | 1332.0326                            | 15204    | 741.2425                   | 3068     |
| 656.0199                            | 19602    | 2424.5286                  | 5475     | 1333.0345                            | 7296     | 739.2401                   | 1770     |
| 1333.0242                           | 18351    | 2425.5282                  | 5429     | 657.0288                             | 7161     | 2531.4709                  | 1488     |
| 741.059                             | 13440    | 2422.5275                  | 4838     | 679.0056                             | 6549     | 742.2463                   | 1347     |
| 977.8349                            | 12161    | 2421.5259                  | 4680     | 977.845                              | 2987     | 2532.4721                  | 1342     |
| 764.0429                            | 10187    | 2426.5285                  | 11709    | 1334.0369                            | 2387     | 2533.4725                  | 1335     |
| 739.0567                            | 8387     | 2427.5282                  | 3950     | 789.0067                             | 1903     | 2529.4733                  | 1181     |
| 1334.0237                           | 6157     | 2428.5325                  | 2982     | 789.2549                             | 1865     | 2530.4753                  | 1166     |
| 978.8383                            | 5974     | 2420.528                   | 2961     | 993.8355                             | 1626     | 776.4788                   | 1120     |
| 765.0473                            | 5687     | 2419.5248                  | 2666     | 741.0668                             | 1601     | 2534.4753                  | 1106     |

## Comment on the negative charge of *R,R*-pinppy and *R,R*-Fpinppy ligands within Ir(III) complexes in reported materials and their molecular precursors

It is important to clarify that both in the reported materials of **Eu<sub>2</sub>Ir<sub>2</sub>** and **Eu<sub>2</sub>Flr<sub>2</sub>**, as well as in their molecular precursors of ***R,R*-Ir** and ***R,R*-Flr**, the organic ligands of *R,R*-pinppyH and *R,R*-FpinppyH exist in the negatively charged (1<sup>−</sup>) forms, which we abbreviate as *R,R*-pinppy and *R,R*-Fpinppy, respectively. These ligands are initially obtained in the neutral forms as visualized in Scheme 1 (main article) and a detailed scheme in the Experimental details. They both consist of a pinene-functionalized pyridine ring combined by a C–C bond with a phenyl ring (a fluorinated phenyl ring for the case of *R,R*-FpinppyH). However, upon the formation of Ir(III) complexes, the C–H activation of one of the C–H bonds of the phenyl ring is induced. The C–H activation occurs on the C–H group of a phenyl ring that is the closest to the pyridine ring, and this process is strictly related to the concomitant occurrence of the cyclometalation leading to the C,N-bidentate coordination of deprotonated *R,R*-pinppy and *R,R*-Fpinppy ligands to the Ir(III) centers. In other words, the formation of cyclometalated Ir(III) complexes is related to the appearance of the carbanion form of *R,R*-pinppyH and *R,R*-FpinppyH ligands, i.e., the generation of negatively charged *R,R*-pinppy<sup>−</sup> and *R,R*-Fpinppy<sup>−</sup> ligands.

The confirmation of the appearance of the key C–Ir bond is given by the SC-XRD experiments on the molecular precursors of ***R,R*-Ir** and ***R,R*-Flr**, and further a main heterometallic material of **Eu<sub>2</sub>Ir<sub>2</sub>** (Fig. 1, S4, and S5, as well as ref. S1). The related structural models undoubtedly indicate the presence of short C–Ir distances (2.05–2.06 Å), which are very close to the analogous N–Ir bonds for the coordinated pyridine part of the ligands, as typically observed for cyclometalated Ir(III) complexes bearing a carboanion form of 2-phenylpyridine (or its derivatives) as a ligand.<sup>S30–S49</sup> In this context, it is important to state that such a C–H activation of 2-phenylpyridine-type ligands occurring upon the cyclometalation and formation of Ir(III) complexes is broadly observed and is one of the most extensively studied as a source of variously functionalized cyclometalated Ir(III) complexes, mainly for their optical and optoelectronic properties.<sup>S30–S49</sup> For instance, the archetypal organo-iridium(III) complex, i.e., [Ir<sup>III</sup>(ppy)<sub>3</sub>]<sup>0</sup>, which was reported as one of the very first high-performance electroluminescent metal complexes,<sup>S30,S49,S50</sup> is based on three 2-phenylpyridine ligands in their deprotonated (carbanion) forms (ppy<sup>−</sup>) coordinated to the Ir(III) center. This type of the C–H activation of 2-phenylpyridine leading to its carbanion form is also observed for many other metal centers, such as Pt(II), Au(III), or Ru(II).<sup>S51–S53</sup> It can be considered as one of the main reactions utilized for organometallic complexes of transition metal ions, especially those explored for their broad optical and optoelectronic applications.<sup>S30–S53</sup> In Fig. S42, the representative set of the published cyclometalated Ir(III) complexes bearing the carbanion forms of the various derivatives of 2-phenylpyridine is shown to support the above-presented discussion. Following this discussion, everywhere in the article, we use the abbreviations of *R,R*-pinppyH and *R,R*-FpinppyH for the as-synthesized neutral forms of the 2-phenylpyridine derivatives, whereas the abbreviations of *R,R*-pinppy and *R,R*-Fpinppy are used for the carbanion forms of the respective ligands.

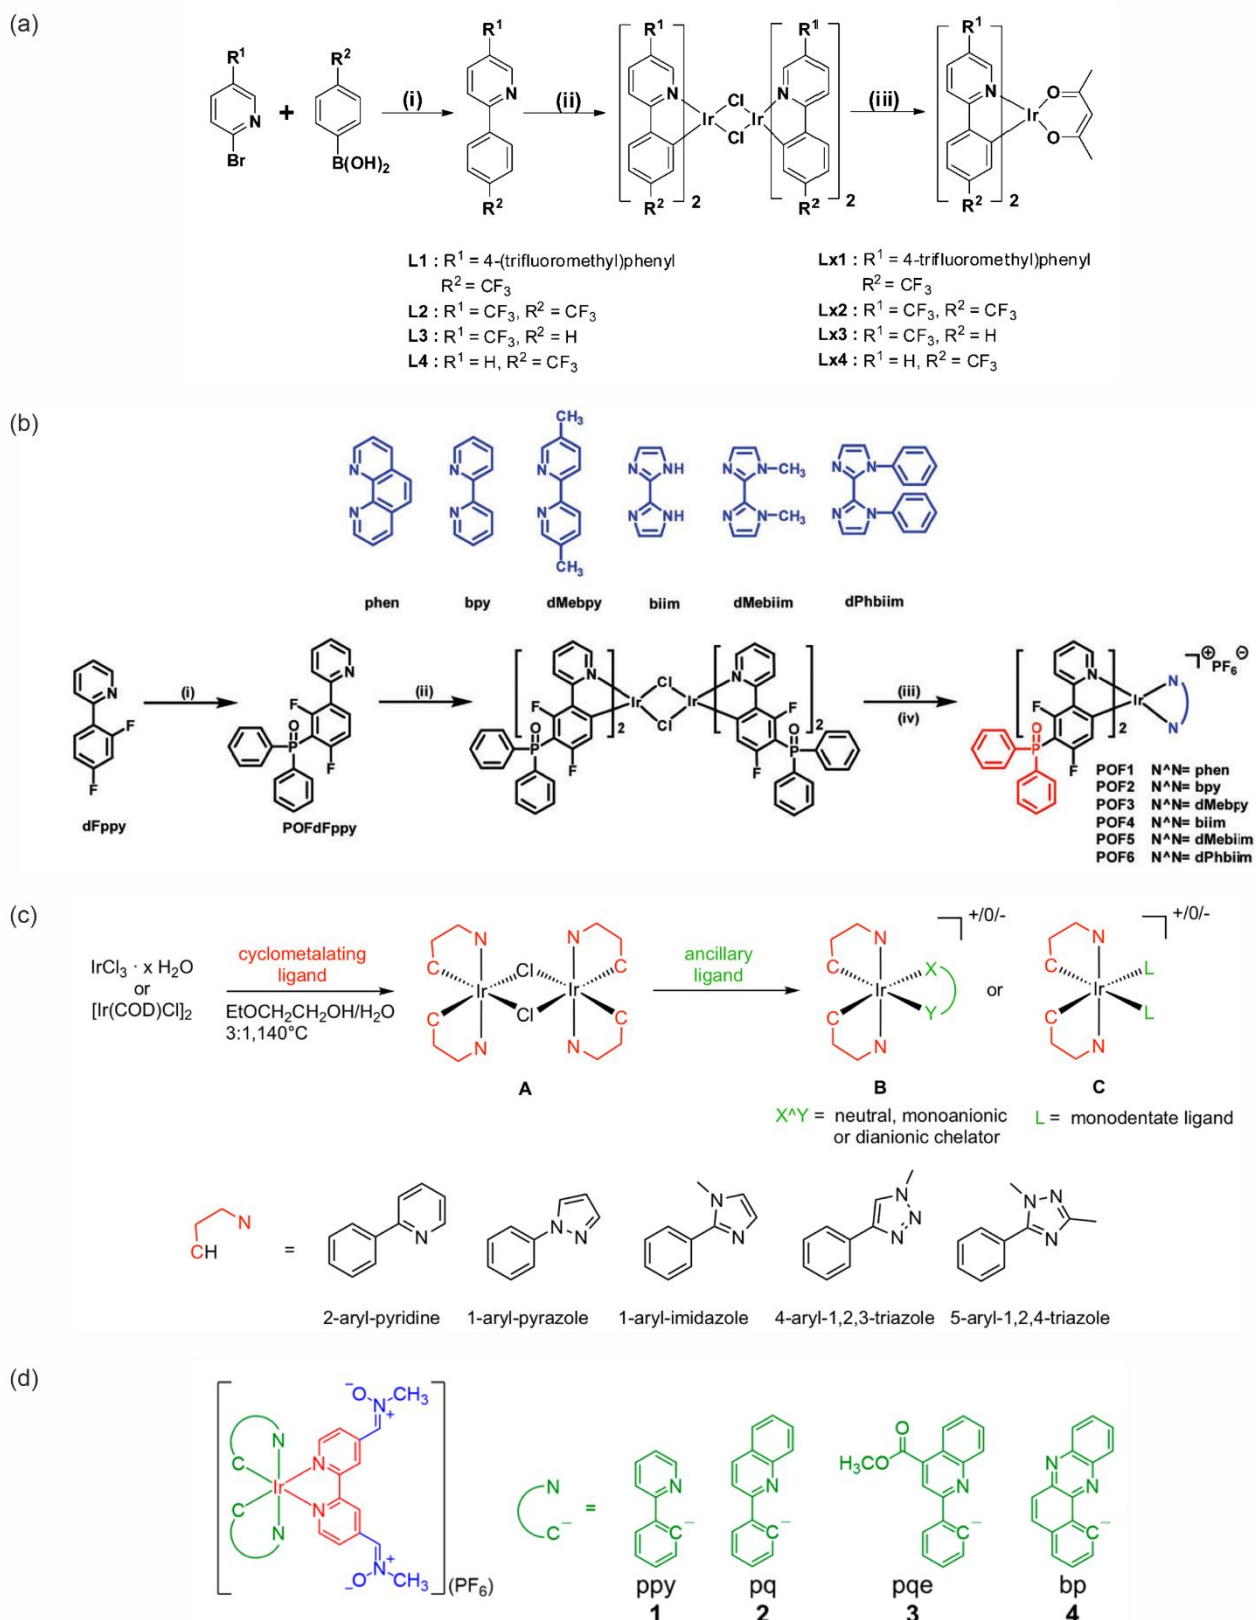

**Fig. S42** The representative set of published cyclometalated Ir(III) complexes bearing the carbanion form of 2-phenylpyridine and its derivatives, including trifluoromethyl-substituted 2-phenylpyridine with acetoacetonate co-ligands (a),<sup>S32</sup> diphenylphosphoryl-substituted 2-phenylpyridine with N,N-bidentate co-ligands (b),<sup>S33</sup> 2-arylpyridine and its analogs with other N-containing aromatic rings used instead of pyridine with various co-ligands (c),<sup>S39</sup> and 2-phenylpyridine and their more extended analogs with bis-nitrone-containing co-ligands (d).<sup>S40</sup> Part (a) was reproduced from Ref. S32 with permission from the Royal Society of Chemistry. Part (b) was reproduced from Ref. S33 with permission from the Royal Society of Chemistry. Part (c) was adapted under terms of the CC-BY license, ref. S39. Part (d) was adapted with permission from Ref. S40. Copyright 2024 American Chemical Society.



## References to Supporting Information

- S1 J. Rzepiela, M. Liberka, M. Zychowicz, J. Wang, H. Tokoro, K. Piotrowska, S. Baś, S. Ohkoshi and S. Chorazy, *Inorg. Chem. Front.*, 2024, **11**, 1366–1380.
- S2 G. M. Sheldrick, *Acta Crystallogr., Sect. A: Found. Adv.*, 2015, **71**, 3–8.
- S3 L. J. Farrugia, *J. Appl. Crystallogr.*, 2012, **45**, 849–854.
- S4 R. Jankowski, J. J. Zakrzewski, M. Zychowicz, J. Wang, Y. Oki, S. Ohkoshi, S. Chorazy and B. Sieklucka, *J. Mater. Chem. C*, 2021, **9**, 10705–10717.
- S5 S. Chorazy, J. J. Zakrzewski, J. Wang, S. Ohkoshi and B. Sieklucka, *CrysEngComm*, 2018, **20**, 5695–5706.
- S6 M. Liberka, M. Zychowicz and S. Chorazy, *Inorg. Chem. Front.*, 2024, **11**, 2081–2097.
- S7 M. Llunell, D. Casanova, J. Cirera, J. Bofill, P. Alemany, S. Alvarez, M. Pinsky and D. Avnir, *SHAPE v. 2.1. Program for the Calculation of Continuous Shape Measures of Polygonal and Polyhedral Molecular Fragments*, University of Barcelona: Barcelona, Spain, 2013.
- S8 D. Casanova, J. Cirera, M. Llunell, P. Alemany, D. Avnir and S. Alvarez, *J. Am. Chem. Soc.*, 2004, **126**, 1755–1763.
- S9 A. Ruiz-Martínez, D. Casanova and S. Alvarez, *Chem. Eur. J.*, 2008, **14**, 1291–1303.
- S10 A. Ruiz-Martínez and S. Alvarez, *Chem. Eur. J.*, 2009, **15**, 7470–7480.
- S11 D. A. Kleinman, *Phys. Rev.*, 1962, **128**, 1761–1775.
- S12 D. A. Kleinman, *Phys. Rev.*, 1977, **126**, 1977–1979.
- S13 H.-J. Zhao, Y.-F. Zhang and L. Chen, *J. Am. Chem. Soc.*, 2012, **134**, 1993–1995.
- S14 G. R. Crane and J. G. Bergman, *J. Chem. Phys.*, 1976, **64**, 27–29.
- S15 C. A. Dailey, B. J. Burke and G. J. Simpson, *Chem. Phys. Lett.*, 2004, **390**, 8–13.
- S16 J. Wang, J. J. Zakrzewski, M. Zychowicz, Y. Xin, H. Tokoro, S. Chorazy and S. Ohkoshi, *Angew. Chem. Int. Ed.*, 2023, **62**, e202306372.
- S17 F. Neese, *WIREs Comput. Mol. Sci.*, 2022, **12**, e1606.
- S18 K. Momma and F. Izumi, *J. Appl. Crystallogr.*, 2011, **44**, 1272–1276.
- S19 F. Weigend and R. Ahlrichs, *Phys. Chem. Chem. Phys.*, 2005, **7**, 3297–3305.
- S20 E. Caldeweyher, S. Ehlert, A. Hansen, H. Neugebauer, S. Spicher, C. Bannwarth and S. Grimme, *J. Chem. Phys.*, 2019, **150**, 154122.
- S21 R. Cammi, B. Mennucci and J. Tomasi, *J. Phys. Chem. A*, 2000, **104**, 5631–5637.
- S22 E. van Lenthe, E. J. Baerends and J. G. Snijders, *J. Chem. Phys.*, 1993, **99**, 4597–4610.
- S23 C. van Wüllen, *J. Chem. Phys.*, 1998, **109**, 392–399.
- S24 D. A. Pantazis, X.-Y. Chen, C. R. Landis and F. J. Neese, *J. Chem. Theory Comput.*, 2008, **4**, 908–919.
- S25 M. Buhl, C. Reimann, D. A. Pantazis, T. Bredow and F. Neese, *J. Chem. Theory Comput.*, 2008, **4**, 1449–1459.
- S26 F. Neese, F. Wennmohs, A. Hansen and U. Becker, *Chem. Phys.*, 2009, **356**, 98–109.
- S27 R. Izsák and F. Neese, *J. Chem. Phys.*, 2011, **135**, 144105.
- S28 F. Neese, *J. Chem. Phys.*, 2005, **122**, 034107.
- S29 N. Mohd Ali, V. L. MacLeod, P. Jennison, I. V. Sazanovich, C. A. Hunter, J. A. Weinstein and M. D. Ward, *Dalton Trans.* 2012, **41**, 2408–2419.
- S30 K. Dedeian, P. I. Djurovich, F. O. Garces, G. Carlson and R. J. Watts, *Inorg. Chem.* 1991, **30**, 1687–1688.
- S31 P. Wang, F.-F. Wang, Y. Chen, Q. Niu, L. Lu, H.-M. Wang, X.-C. Gao, B. Wei, H.-W. Wu, X. Cai and D.-C. Zou, *J. Mater. Chem. C* 2013, **1**, 4821–4825.
- S32 C. Liu, X. Lv, Y. Xing and J. Qiu, *J. Mater. Chem. C* 2015, **3**, 8010–8017.
- S33 H. Yu, C. Liu, Z. Yu, L. Zhang and J. Xiu, *J. Mater. Chem. C* 2017, **5**, 3519–3527.
- S34 Y. Zhang, X. Chen, D. Song, D. Zhong, X. Yang, Y. Sun, B. Liu, G. Zhou and Z. Wu, *Inorg. Chem. Front.* 2020, **7**, 1651–1666.
- S35 D. Rota Martir, C. Momblona, A. Pertegas, D. B. Cordes, A. M. Z. Slawin, H. J. Bolink and E. Zysman-Colman, *ACS Appl. Mater. Interfaces* 2016, **8**, 33907–33915.
- S36 A. Y. Gitlina, F. Fadaei-Tirani, A. Ruggi, C. Plaice and K. Severin, *Chem. Sci.* 2022, **13**, 10370–10374.
- S37 W.-Y. Wong, N.-Y. Chau, Q. Wang, L. Jiang, J. Li and D. Ma, *J. Mater. Chem. C* 2024, **12**, 14485–14495.
- S38 A. Santoro, A. M. Prokhorov, V. N. Kozhevnikov, A. C. Whitwood, B. Donnio, J. A. G. Williams and D. B. Bruce, *J. Am. Chem. Soc.* 2011, **133**, 5248–5251.

- S39 F. Monti, A. Baschieri, L. Sambri and N. Armaroli, *Acc. Chem. Res.* 2021, **54**, 1492–1505.
- S40 E. C.-L. Mak, Z. Chen, L. C.-C. Lee, P. K.-K. Leung, A. M.-H. Yip, J. Shum, S.-M. Yiu, V. W.-W. Yam and K. K.-W. Lo, *J. Am. Chem. Soc.* 2024, **146**, 25589–25599.
- S41 E. E. Turner, D. J. Breen, G. Kosgei, L. A. Crandall, G. M. Curtin, E. Jakubikova, R. M. O'Donnell, C. J. Ziegler and J. J. Rack, *Inorg. Chem.* 2022, **61**, 18842–18849.
- S42 J.-X. Xie, C.-C. Lee, L.-M. Huang, H.-T. Lin, D. Luo, C.-H. Hsieh, S.-W. Liu and C.-H. Chen, *ACS Appl. Mater. Interfaces* 2023, **15**, 44022–44032.
- S43 M. S. Lowry, J. I. Goldsmith, J. D. Slinker, R. Rohl, R. A. Pascal Jr., G. G. Malliaras and S. Bernhard, *Chem. Mater.* 2005, **17**, 5712–5719.
- S44 X. Liu, J. Liu, D. Zhu, X. Yan, J. Chen, L. Duan, Y. Kang and D. Ma, *J. Am. Chem. Soc.* 2024, **146**, 29955–29963.
- S45 S. Lamansky, P. Djurovich, D. Murphy, F. Abdel-Razzaq, R. Kwong, I. Tsyba, M. Bortz, B. Mui, R. Bau and M. E. Thompson, *Inorg. Chem.* 2001, **40**, 1704–1711.
- S46 B. Schmid, F. O. Garces and R. J. Watts, *Inorg. Chem.* 1994, **33**, 9–14.
- S47 A. Nakagawa, Y. Hisamatsu, S. Moromizato, M. Kohno and S. Aoki, *Inorg. Chem.* 2014, **53**, 409–422.
- S48 T. U. Connell, C. L. Fraser, M. L. Czyn, Z. M. Smith, D. J. Hayne, E. H. Doeven, J. Aguiaro, D. J. D. Wilson, J. L. Adcock, A. D. Scully, D. E. Gomez, N. W. Barnett, A. Polyzos and P. S. Francis, *J. Am. Chem. Soc.* 2019, **141**, 17646–17658.
- S49 T. Hofbeck and H. Yersin, *Inorg. Chem.* 2010, **49**, 9290–9299.
- S50 Y. Kawamura, K. Goushi, J. Brooks, J. J. Brown, H. Sasabe and C. Adachi, *Appl. Phys. Lett.* 2005, **86**, 071104.
- S51 J. Wu, B. Xu, Y. Xu, L. Yue, J. Chen, G. Xie and J. Zhao, *Inorg. Chem.* 2023, **62**, 19142–19152.
- S52 V. K.-M. Au, K. M.-C. Wong, N. Zhu and V. W.-W. Yam, *Chem. Eur. J.* 2011, **17**, 130–142.
- S53 B. Pena, N. A. Leed, K. R. Dunbar and C. Turro, *J. Phys. Chem. C* 2012, **116**, 22186–22195.
